# Supplementary material for: Interplay between chalcogen bonds and dynamic covalent bonds
Source: Royal Society of Chemistry journal article supplement (doi:10.1039/d2qo00684g), 2022-01-01
Supplement: d2qo00684g1.pdf [file d2qo00684g1.pdf]

# Interplay between Chalcogen Bonds and Dynamic Covalent Bonds

Shuaipeng Jia,<sup>a, b</sup> Hebo Ye,<sup>a,\*</sup> and Lei You<sup>a, b, c,\*</sup>

a. State Key Laboratory of Structural Chemistry, Fujian Institute of Research on the Structure of Matter, Chinese Academy of Sciences, Fuzhou 350002, China.

b. University of Chinese Academy of Sciences, Chinese Academy of Sciences, Beijing 100049, China.

c. Fujian Science & Technology Innovation Laboratory for Optoelectronic Information of China, Fuzhou 350108, China.

# Table of Contents

|                                                                   |                |
|-------------------------------------------------------------------|----------------|
| <b>1. General Methods.....</b>                                    | <b>S3-S4</b>   |
| <b>2. Synthesis and Characterization.....</b>                     | <b>S5-S23</b>  |
| <b>3. Dynamic Covalent Reactions</b>                              |                |
| <b>(1) Imine formation.....</b>                                   | <b>S24-S38</b> |
| <b>(2) Imine exchange.....</b>                                    | <b>S39-S46</b> |
| <b>4. DFT Calculations.....</b>                                   | <b>S47-S57</b> |
| <b>5. Control over Thermodynamic and Kinetic Selectivity.....</b> |                |
| .....                                                             | <b>S58-S76</b> |
| <b>6. Molecular Coordinates.....</b>                              | <b>S77-S87</b> |
| <b>7. References.....</b>                                         | <b>S88</b>     |

## 1. General Methods

**General.**  $^1\text{H}$  NMR and  $^{13}\text{C}$  NMR spectra were recorded on a 400 MHz Bruker Biospin Avance III spectrometer or a 400 MHz JEOL JNM-ECZ400S spectrometer. The chemical shifts ( $\delta$ ) for  $^1\text{H}$  NMR spectra, given in ppm, are referenced to the residual proton signal of the deuterated solvent. Mass spectral analysis (ESI-HRMS) were performed on ThermoScientificLCQ Fleet mass spectrometer and a Bruker IMPACT-II spectrometer. Infrared. (IR) spectra were recorded with a KBr pellet, and wavenumbers are given in  $\text{cm}^{-1}$ . Crystallographic data was collected on a Mercury single crystal diffractometer. The structures were solved with direct methods by using SHELXS-97 and refined with the full-matrix least-squares technique based on F2. Deuterium solvents were purchased from Aldrich. All other reagents were obtained from commercial sources and were used without further purification, unless indicated otherwise.

**DCRs in Acetonitrile.** Dynamic Covalent Reactions (DCRs) were performed *in situ* in  $\text{CD}_3\text{CN}$  without isolation and purification. To a stirred solution of **1** (15 mM, 1.0 equiv.) in  $\text{CD}_3\text{CN}$  (0.60 mL), were added 1-butylamine (15 mM, 1.2 equiv.) and activated 3 Å molecular sieves (MS, 4-8 mesh). The mixture was stirred at room temperature overnight and characterized by  $^1\text{H}$  NMR and ESI-MS. For competition experiments, both aldehydes (15 mM each, 1.0 equiv.) were mixed with 1-butylamine (15 mM, 1.0 equiv.) in  $\text{CD}_3\text{CN}$  (0.60 mL). The mixture was tracked by  $^1\text{H}$  NMR until the equilibrium was reached. All competition experiments were performed twice to ensure reproducibility. To explore the thermodynamic and kinetic selectivity,  $\text{Zn}(\text{OTf})_2$  (1.5 mM, 0.1 equiv.) was added to the competition experiments. Furthermore, aldehydes **1**(SPh) and **5** (15 mM each, 1.0 equiv.) were mixed with 1-butylamine (15 mM, 1.0 equiv.) and different Lewis acid (1.5 mM, 0.1 equiv.) in  $\text{CD}_3\text{CN}$  (0.6 mL), and the mixture was stirred overnight and characterized by  $^1\text{H}$  NMR to determine the extent of acceleration.

**DFT Calculations.** Geometry optimization and frequencies calculations were performed by using Gaussian 09 packages,<sup>S1</sup> with the DFT method and basis set of

M06-2X-D3/def2-TZVP. The default settings of def2-TZVP for Te in G09 was made up of relativistic effective core potential and the Stuttgart-Dresden effective core potential frozen core basis set MWB28. We also included the PCM of acetonitrile and the ultrafine integration grid during the optimization and frequency analysis. All the geometries were determined without imaginary frequencies by frequency analysis. The torsion scans of open and closed conformations of **1**(SePh)/**1**(SeMe) along the C-SePh/C-SeMe bond were conducted, and the resulting conformers 1, 2, and 3 were found to account for the major population (Figures S22 and S23). Therefore, these conformers were set as initial structures of **1**(ChR)/**2**(ChR) for optimization and the subsequent analysis. For the simplicity methylamine was used for **2**(ChR). Generalized Kohn-Sham energy decomposition analysis (GKS-EDA) was employed to calculate the total interaction energy of **1/2** and dissect the contributing factors to chalcogen bonding by the modified GAMESS (version: 2020-R2) from XMVB team.<sup>S2</sup> The same levels of M06-2X-D3/def2-TZVP was also used for GKS-EDA calculation. Unlike G09, the mixed basis set for Te was manually specified in GAMESS. The NBO analysis<sup>S3</sup> was implemented by NBO 3.1 module in G09. The electronic density cubes for Atoms in Molecules (AIM) and Noncovalent Interaction (NCI)<sup>S4</sup> were generated by Multiwfn 3.80<sup>S5</sup> and presented by VMD 1.90.<sup>S6</sup> See more details in associated Figures and Tables if necessary.

## 2. Synthesis and Characterization

**Scheme S1.** General synthetic routes of **1(ChPh)** and **3(ChPh)**.

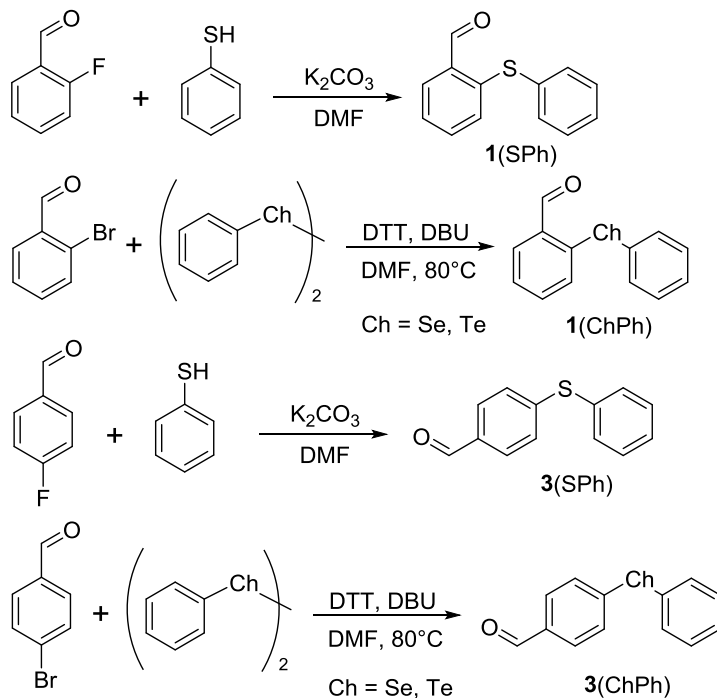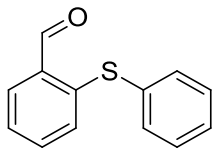

**2-(phenylthio)benzaldehyde:** The reported procedure<sup>S7</sup> was used to afford the title compound as a yellow solid (yield: 88%). <sup>1</sup>H NMR (CDCl<sub>3</sub>): δ 10.19 (s, 1H), 7.74 (dd, *J*=7.6, 1.6 Hz, 2H), 7.47 (ddd, *J*=8.1, 7.3, 1.6 Hz, 1H), 7.29-7.25 (m, 1H), 7.21 (ddd, *J*=7.5, 7.5, 1.1 Hz, 1H), 2.43 (s, 3H).

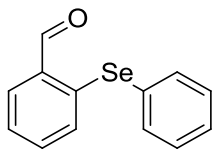

**2-(phenylselenenyl)benzaldehyde:** The reported procedure<sup>S8</sup> was used to afford the title compound as a yellow solid (yield: 78%). <sup>1</sup>H NMR (CD<sub>3</sub>CN): δ 10.16 (s, 1H), 7.95 (d, *J* = 7.2 Hz, 1H), 7.72-7.67 (m, 2H), 7.57-7.46 (m, 3H), 7.44-7.34 (m, 2H), 6.99 (d, *J* = 7.2 Hz, 1H).

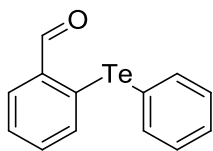

**2-(phenyltellanyl)benzaldehyde:** Diphenyl ditelluride<sup>S9</sup> (246 mg, 0.6 mmol) was added to a solution of DTT (dithiothreitol) (154 mg, 1.0 mmol) in anhydrous DMF (2 mL) under N<sub>2</sub> atmosphere. After stirring at 80 °C for 30 min, *o*-bromobenzaldehyde (185 mg, 1.0 mmol) was added to the reaction mixture, and the mixture was stirred for 15 min. 1,8-Diazabicyclo[5.4.0]undec-7-ene (DBU, 0.375 mL, 2.5 mmol) was added, and the mixture was stirred for further 15 min. The solvent was removed under reduced pressure, and the residue was extracted with ethyl acetate. The combined organic layer was dried over anhydrous MgSO<sub>4</sub>. The crude product was purified by column chromatography (SiO<sub>2</sub>, petroleum ether: ethyl acetate = 20:1) to afford the title compound as a yellow solid (210 mg, 68%). MP: 55.5-55.9 °C. <sup>1</sup>H NMR (CD<sub>3</sub>CN): δ 10.19 (s, 1H), 8.01 (dd, *J* = 7.6, 1.6 Hz, 1H), 7.98-7.94 (m, 2H), 7.54 (t, *J* = 7.6 Hz, 1H), 7.46-7.40 (m, 3H), 7.3 (td, *J* = 7.2, 1.2 Hz, 1H), 7.15 (d, *J* = 8.0 Hz, 1H). <sup>13</sup>C NMR (CD<sub>3</sub>CN): δ 195.0, 142.3, 138.1, 136.9, 134.9, 133.9, 130.8, 130.1, 127.1, 126.1, 117.2. ESI-HRMS *m/z*: [M + H]<sup>+</sup> calcd for C<sub>13</sub>H<sub>11</sub>OTe 312.9867; found: 312.9862.

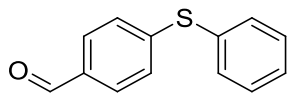

**4-(phenylsulfanyl)benzaldehyde:** The reported procedure<sup>S10</sup> was used to afford the title compound as a white liquid (yield: 91%). <sup>1</sup>H NMR (CDCl<sub>3</sub>): δ 9.91 (s, 1H), 7.72 (d, *J* = 8.4 Hz, 2H), 7.37-7.60 (m, 5H), 7.24 (d, *J* = 8.4 Hz, 2H).

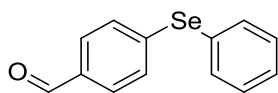

**4-(phenylselenenyl)benzaldehyde:** Diphenyl diselenide<sup>S11</sup> (187 mg, 0.6 mmol) was added to a solution of DTT (dithiothreitol) (154 mg, 1.0 mmol) in anhydrous DMF (2 mL) under N<sub>2</sub> atmosphere. After stirring at 80 °C for 30 min, *p*-bromobenzaldehyde (185 mg, 1.0 mmol) was added to the reaction mixture, and the mixture was stirred for 15 min. 1,8-Diazabicyclo[5.4.0]undec-7-ene (DBU, 0.375 mL, 2.5 mmol) was added, and the mixture was stirred for further 15 min. The solvent was removed under reduced pressure, and the residue was extracted with ethyl acetate. The combined organic layer was dried over anhydrous MgSO<sub>4</sub>. The crude product was

purified by column chromatography (SiO<sub>2</sub>, petroleum ether: ethyl acetate = 30:1) to afford the title compound as a yellow liquid (195 mg, 74%). <sup>1</sup>H NMR (CDCl<sub>3</sub>): δ 9.92 (s, 1H), 7.70 (d, *J* = 8.0 Hz, 2H), 7.65-7.59 (m, 2H), 7.45-7.35 (m, 5H). <sup>13</sup>C NMR (CDCl<sub>3</sub>): δ 191.4, 142.8, 135.6, 134.4, 130.1, 130.1, 129.9, 128.9, 127.9. ESI-HRMS *m/z*: [M + H]<sup>+</sup> calcd for C<sub>13</sub>H<sub>11</sub>OSe 262.9970; found: 262.9968.

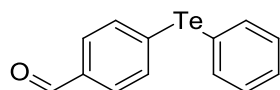

**4-(phenyltellanyl)benzaldehyde:** Diphenyl ditelluride (246 mg,

0.6 mmol) was added to a solution of DTT (dithiothreitol) (154 mg, 1.0 mmol) in anhydrous DMF (2 mL) under N<sub>2</sub> atmosphere. After stirring at 80 °C for 30 min, *p*-bromobenzaldehyde (185 mg, 1.0 mmol) was added to the reaction mixture, and the mixture was stirred for 15 min. 1,8-Diazabicyclo[5.4.0]undec-7-ene (DBU, 0.375 mL, 2.5 mmol) was added, and the mixture was stirred for further 15 min. The solvent was removed under reduced pressure, and the residue was extracted with ethyl acetate. The combined organic layer was dried over anhydrous MgSO<sub>4</sub>. The crude product was purified by column chromatography (SiO<sub>2</sub>, petroleum ether: ethyl acetate = 30:1) to give the title compound as a yellow solid (195 mg, 63%). MP: 46.7-47.1 °C. <sup>1</sup>H NMR (CDCl<sub>3</sub>): δ 9.92 (s, 1H), 7.85 (d, *J* = 6.8 Hz, 2H), 7.67-7.60 (m, 4H), 7.41 (t, *J* = 7.2 Hz, 1H), 7.31 (t, *J* = 7.2 Hz, 2H). <sup>13</sup>C NMR (CDCl<sub>3</sub>): δ 191.7, 140.0, 135.7, 135.2, 130.0, 130.0, 129.0, 126.8, 113.0. ESI-HRMS *m/z*: [M + H]<sup>+</sup> calcd for C<sub>13</sub>H<sub>11</sub>OTe 312.9867; found: 312.9862.

**Scheme S2.** General synthetic routes of **1**(ChMe) and **3**(ChMe).

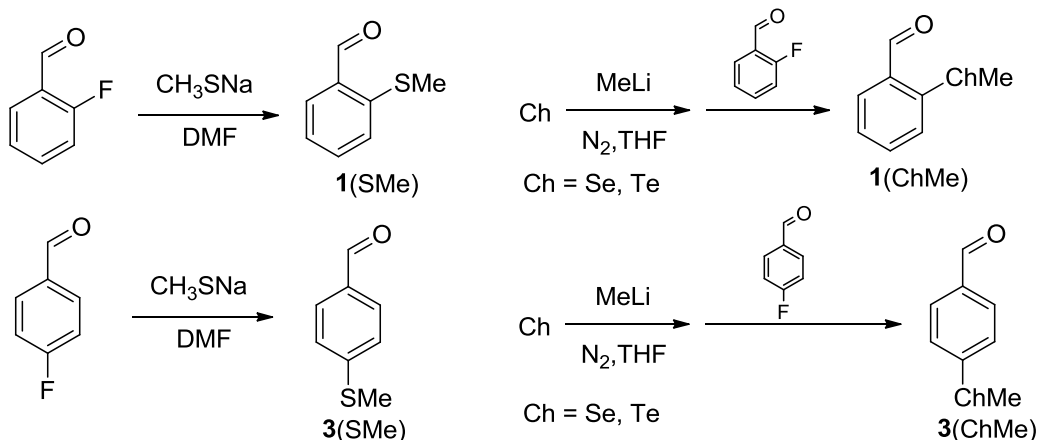

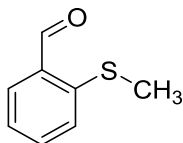

**2-(methylthio)benzaldehyde:** The reported procedure<sup>S12</sup> was used to afford the title compound as a yellow oil (yield: 85%). <sup>1</sup>H NMR (CDCl<sub>3</sub>): δ 10.26 (s, 1H), 7.82 (dd, *J* = 7.6, 1.2 Hz, 1H), 7.54 (td, *J* = 8.0, 1.6 Hz, 1H), 7.35 (d, 8.0 Hz, 1H), 7.21 (td, *J* = 7.2, 1.2 Hz, 1H), 2.50 (s, 3H).

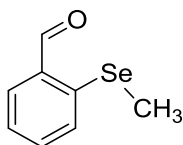

**2-(methylselenyl)benzaldehyde:** Selenium (0.50 g, 6.3 mmol) was suspended in degassed anhydrous THF (40 mL) under argon atmosphere. The suspension was cooled to -10 °C, and MeLi (5.3 mL, 7.0 mmol, 1.1 eq.) was added dropwise. The resulting white suspension was stirred for 40 min. 2-Fluorobenzaldehyde (0.94 g, 7.6 mmol, 1.2 eq.) was added dropwise to give a clear orange solution, which was stirred overnight at room temperature, quenched with water, and extracted with ethyl acetate. The organic layer was washed with brine, dried over anhydrous Na<sub>2</sub>SO<sub>4</sub>, and concentrated in vacuo. The crude mixture was purified by column chromatography (SiO<sub>2</sub>, petroleum ether: ethyl acetate = 20:1) to afford the title compound as a yellow oil (0.86 g, 68%). <sup>1</sup>H NMR (CDCl<sub>3</sub>): δ 10.14 (s, 1H), 7.82 (dd, *J* = 7.6, 1.2 Hz, 1H), 7.52-7.42 (m, 2H), 7.34 (td, *J* = 7.6, 1.2 Hz, 1H), 2.29 (s, 3H). <sup>13</sup>C NMR (CDCl<sub>3</sub>): δ 192.6, 138.8, 135.6, 134.3, 133.9, 127.9, 124.9, 5.92. ESI-HRMS *m/z*: [M + Na]<sup>+</sup> calcd for C<sub>8</sub>H<sub>9</sub>NaOSe 222.9633; found: 222.9630.

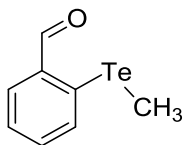

**2-(methyltellanyl)benzaldehyde:** Tellurium (0.80 g, 6.3 mmol) was suspended in degassed anhydrous THF (40 mL) under argon atmosphere. The suspension was cooled to -10 °C, and MeLi (5.3 mL, 7.0 mmol, 1.1 eq.) was added dropwise. The resulting suspension was stirred for 40 min. 2-Fluorobenzaldehyde (0.94 g, 7.6 mmol, 1.2 eq.) was added dropwise to give a clear orange solution, which was stirred overnight at



room temperature, quenched with water, and extracted with ethyl acetate. The organic layer was washed with brine, dried over anhydrous  $\text{Na}_2\text{SO}_4$ , and concentrated in vacuo. The crude mixture was purified by column chromatography ( $\text{SiO}_2$ , petroleum ether: ethyl acetate = 20:1) to afford the title compound as a yellow oil (0.66 g, 42%).  $^1\text{H}$  NMR ( $\text{CDCl}_3$ ):  $\delta$  10.17 (s, 1H), 7.82 (dd,  $J = 7.2, 1.6$  Hz, 1H), 7.61 (d,  $J = 7.6$  Hz, 1H), 7.44 (td,  $J = 7.2, 1.6$  Hz, 1H), 7.38 (td,  $J = 7.2, 1.2$  Hz, 1H), 2.02 (s, 3H).  $^{13}\text{C}$  NMR ( $\text{CDCl}_3$ ):  $\delta$  193.0, 137.2, 136.6, 133.7, 132.4, 125.6, 123.5, -16.1. ESI-HRMS  $m/z$ :  $[\text{M} + \text{H}]^+$  calcd for  $\text{C}_8\text{H}_9\text{OTe}$  250.9716; found: 250.9720.

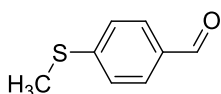

**4-(methylthio)benzaldehyde:** The reported procedure<sup>S6</sup> was used to afford the title compound as a yellow oil (yield: 80%).  $^1\text{H}$  NMR ( $\text{CDCl}_3$ ):  $\delta$  9.92 (s, 1H), 7.77 (d,  $J = 8.4$  Hz, 2H), 7.32 (d,  $J = 8.4$  Hz, 2H), 2.54 (s, 3H).

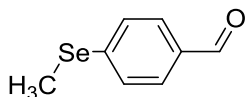

**4-(methylselenyl)benzaldehyde:** Selenium (0.50 g, 6.3 mmol) was suspended in degassed anhydrous THF (40 mL) under argon atmosphere. The suspension was cooled to  $-10$  °C, and MeLi (5.3 mL, 7.0 mmol, 1.1 eq.) was added dropwise. The resulting white suspension was stirred for 40 min. 4-Fluorobenzaldehyde (0.94 g, 7.6 mmol, 1.2 eq.) was added dropwise to give a clear orange solution, which was stirred overnight at room temperature, quenched with water, and extracted with ethyl acetate. The organic layer was washed with brine, dried over anhydrous  $\text{Na}_2\text{SO}_4$ , and concentrated in vacuo. The crude mixture was purified by column chromatography ( $\text{SiO}_2$ , petroleum ether: ethyl acetate = 30:1) to afford the title compound as a yellow oil (0.73 g, 58%).  $^1\text{H}$  NMR ( $\text{CDCl}_3$ ):  $\delta$  9.93 (s, 1H), 7.73 (d,  $J = 8.4$  Hz, 2H), 7.48 (d,  $J = 8.4$  Hz, 2H), 2.42 (s, 3H).  $^{13}\text{C}$  NMR ( $\text{CDCl}_3$ ):  $\delta$  191.6, 142.6, 134.0, 130.1, 129.0, 6.56. ESI-HRMS  $m/z$ :  $[\text{M} + \text{Na}]^+$  calcd for  $\text{C}_8\text{H}_9\text{NaOSe}$  222.9633; found: 222.9631.

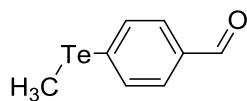

**4-(methyltellanyl)benzaldehyde:** Tellurium (0.80 g, 6.3 mmol) was suspended in degassed anhydrous THF (40 mL) under argon atmosphere. The suspension was cooled to  $-10\text{ }^{\circ}\text{C}$ , and MeLi (5.3 mL, 7.0 mmol, 1.1 eq.) was added dropwise. The resulting suspension was stirred for 40 min. 4-Fluorobenzaldehyde (0.94 g, 7.6 mmol, 1.2 eq.) was added dropwise to give a clear orange solution, which was stirred overnight at room temperature, quenched with water, and extracted with ethyl acetate. The organic layer was washed with brine, dried over anhydrous  $\text{Na}_2\text{SO}_4$ , and concentrated in vacuo. The crude mixture was purified by column chromatography ( $\text{SiO}_2$ , petroleum ether: ethyl acetate = 20:1) to afford the title compound as a yellow oil (0.47 g, 30%).  $^1\text{H}$  NMR ( $\text{CDCl}_3$ ):  $\delta$  9.94 (s, 1H), 7.70 (d,  $J = 8.4$  Hz, 2H), 7.65 (d,  $J = 8.4$  Hz, 2H), 2.28 (s, 3H).  $^{13}\text{C}$  NMR ( $\text{CDCl}_3$ ):  $\delta$  191.2, 135.3, 135.1, 129.9, 124.2, -16.1. ESI-HRMS  $m/z$ :  $[\text{M} + \text{H}]^+$  calcd for  $\text{C}_8\text{H}_9\text{OTe}$  250.9716; found: 250.9719.

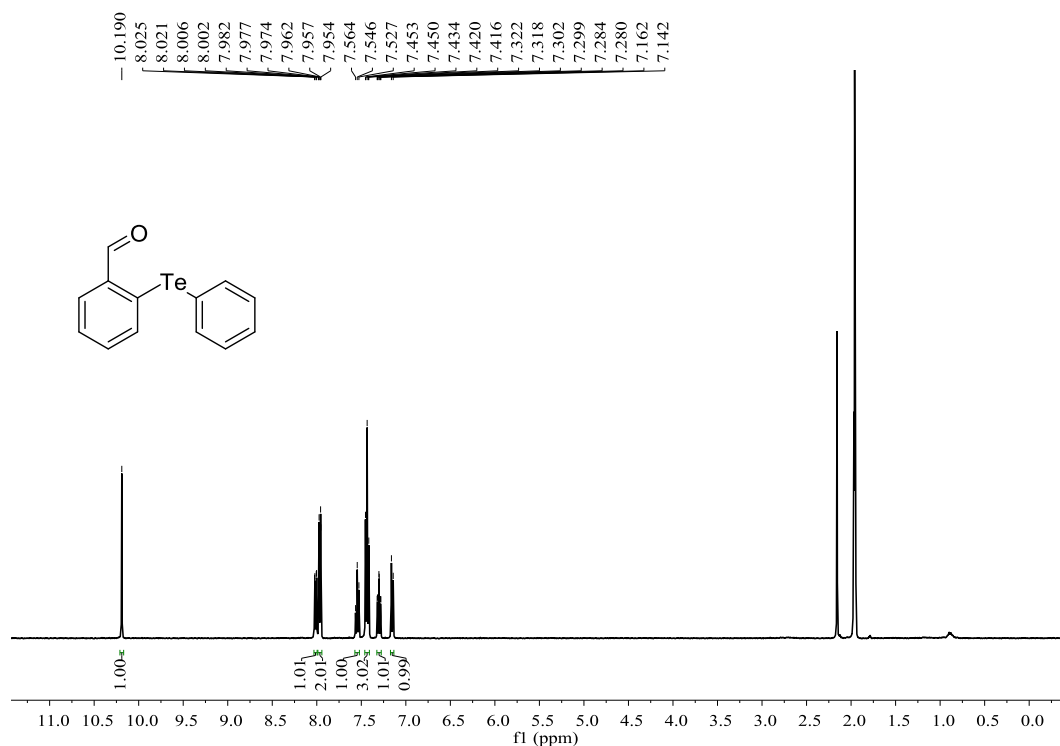

**Figure S1.**  $^1\text{H}$  NMR spectrum of **1**(TePh) in  $\text{CD}_3\text{CN}$ .

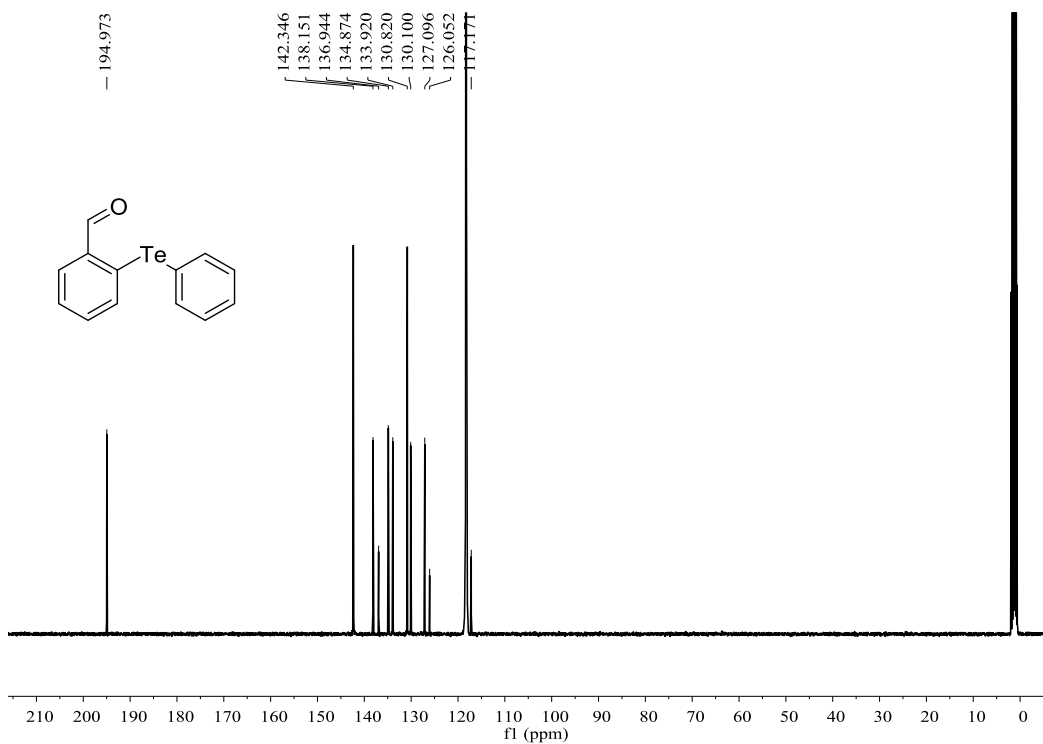

Figure S2.  $^{13}\text{C}$  NMR spectrum of 1(TePh) in  $\text{CD}_3\text{CN}$ .

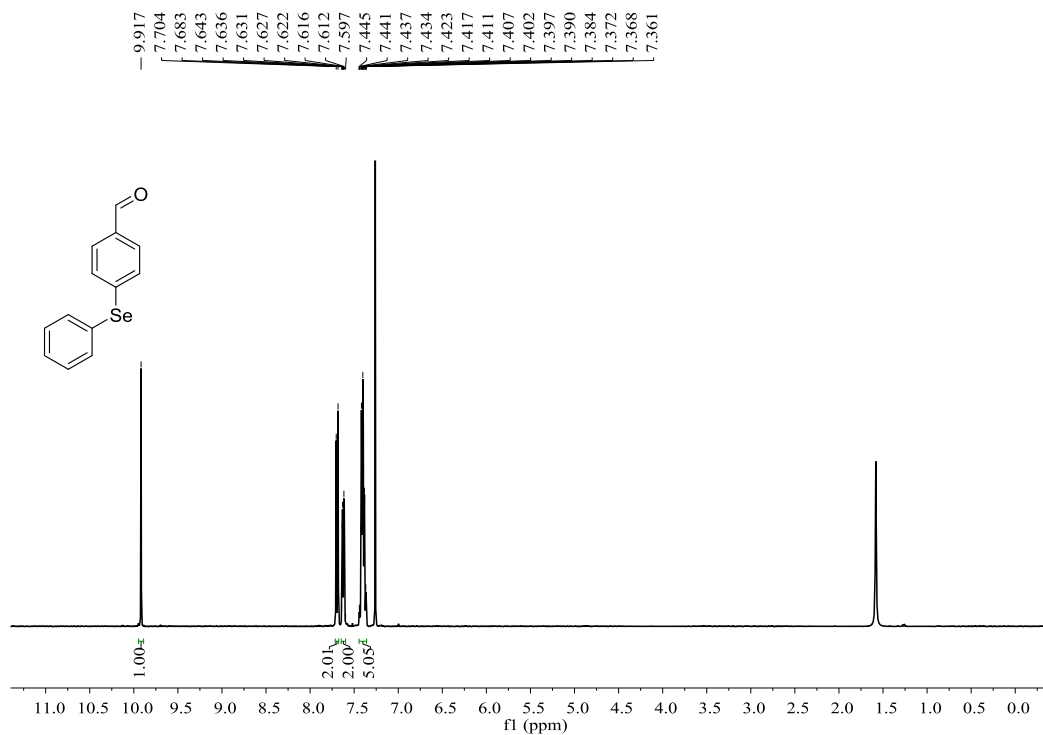

Figure S3.  $^1\text{H}$  NMR spectrum of 3(SePh) in  $\text{CDCl}_3$ .

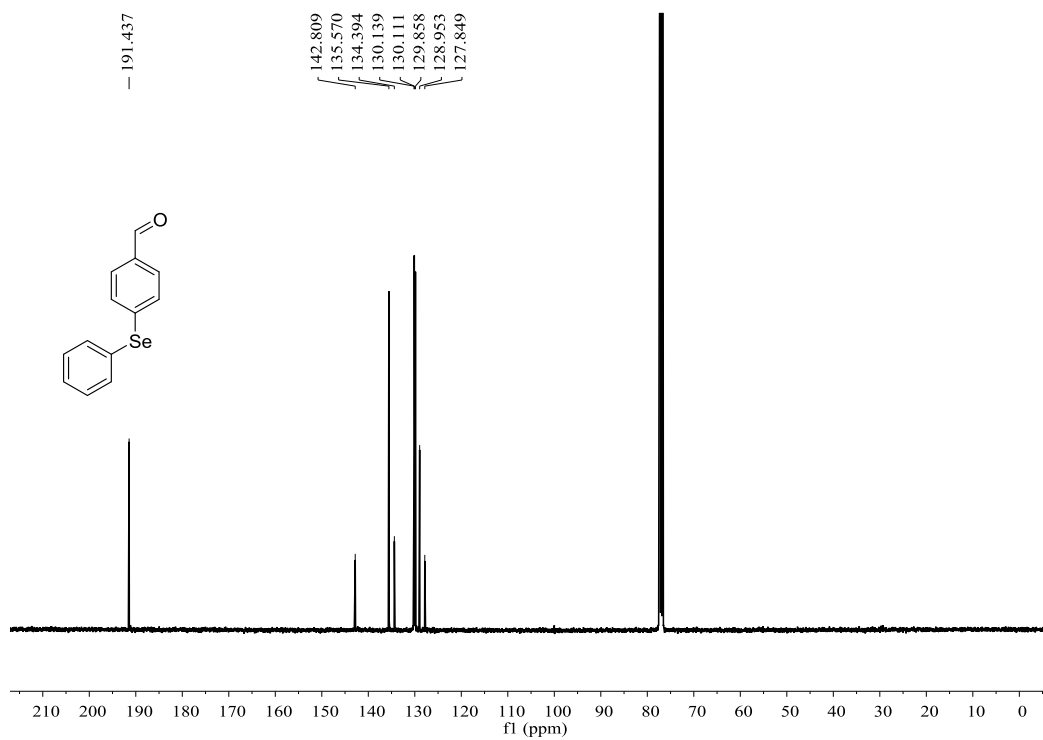

Figure S4.  $^{13}\text{C}$  NMR spectrum of **3(SePh)** in  $\text{CDCl}_3$ .

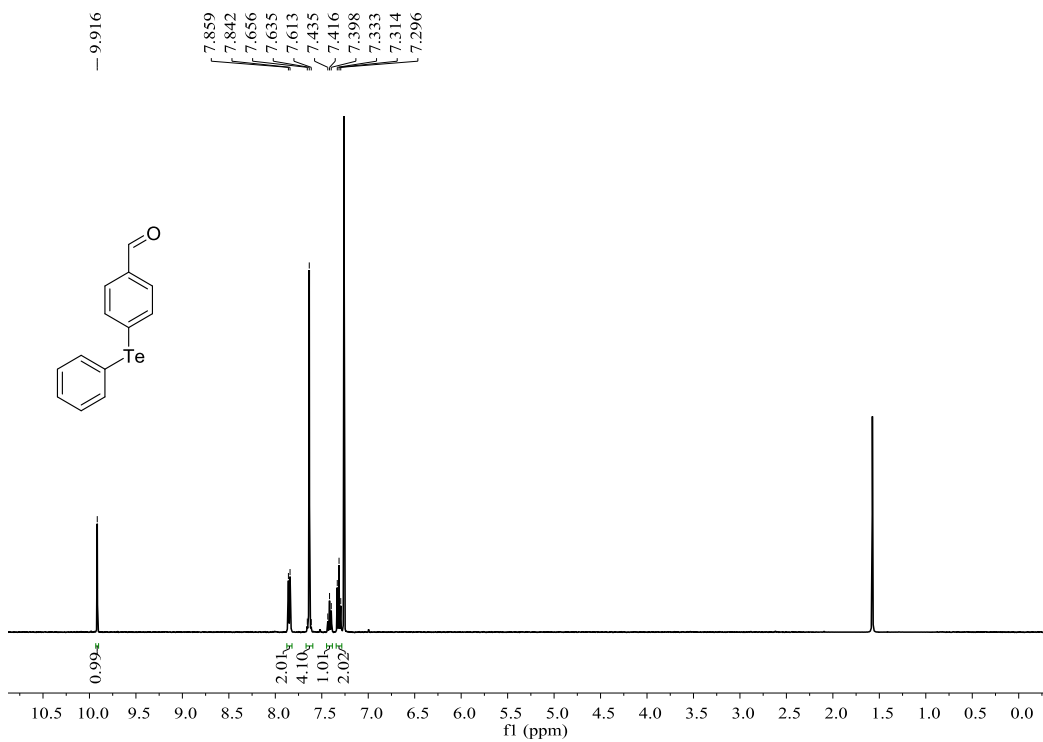

Figure S5.  $^1\text{H}$  NMR spectrum of **3(TePh)** in  $\text{CDCl}_3$ .

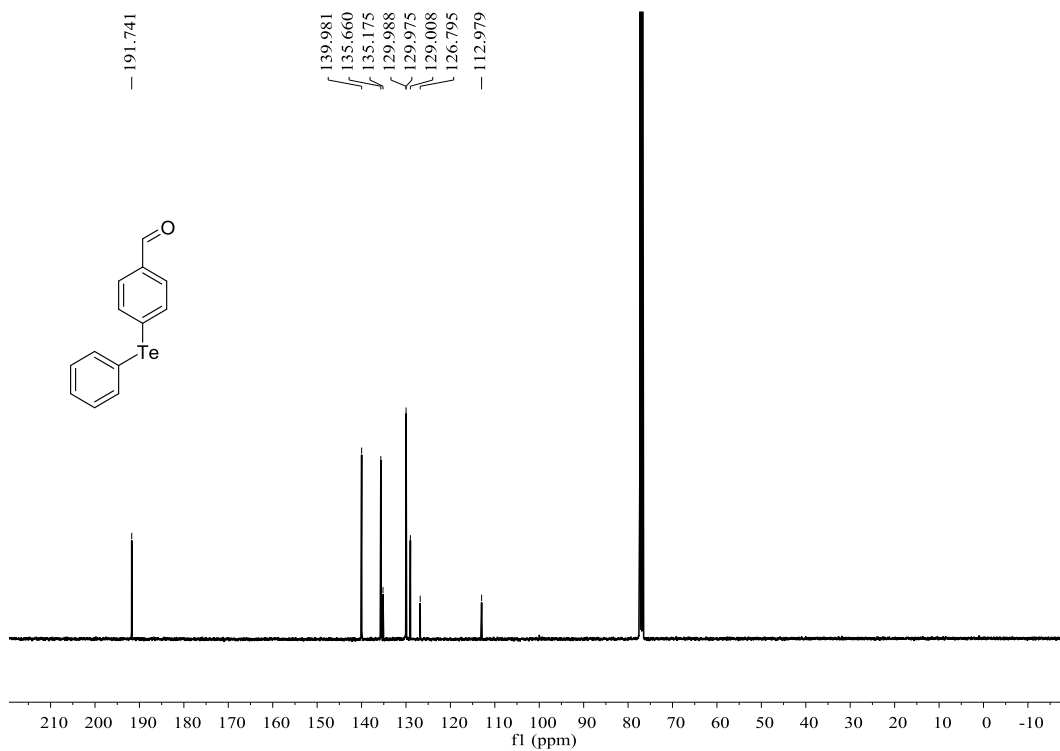

Figure S6.  $^{13}\text{C}$  NMR spectrum of **3**(TePh) in  $\text{CDCl}_3$ .

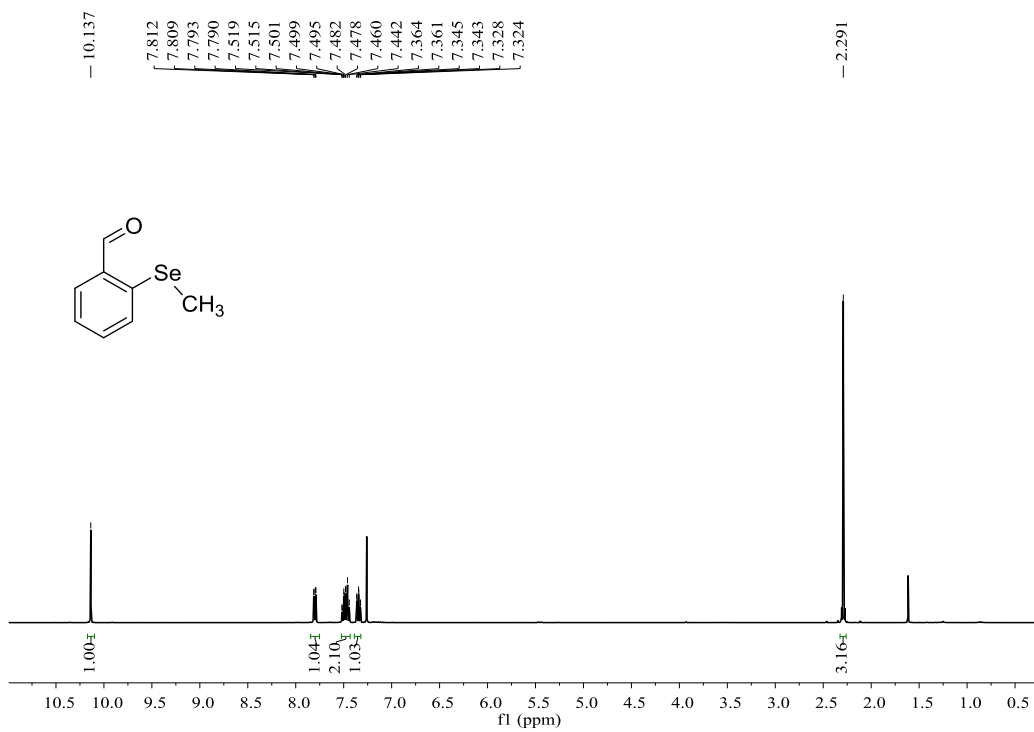

Figure S7.  $^1\text{H}$  NMR spectrum of **1**(SeMe) in  $\text{CDCl}_3$ .

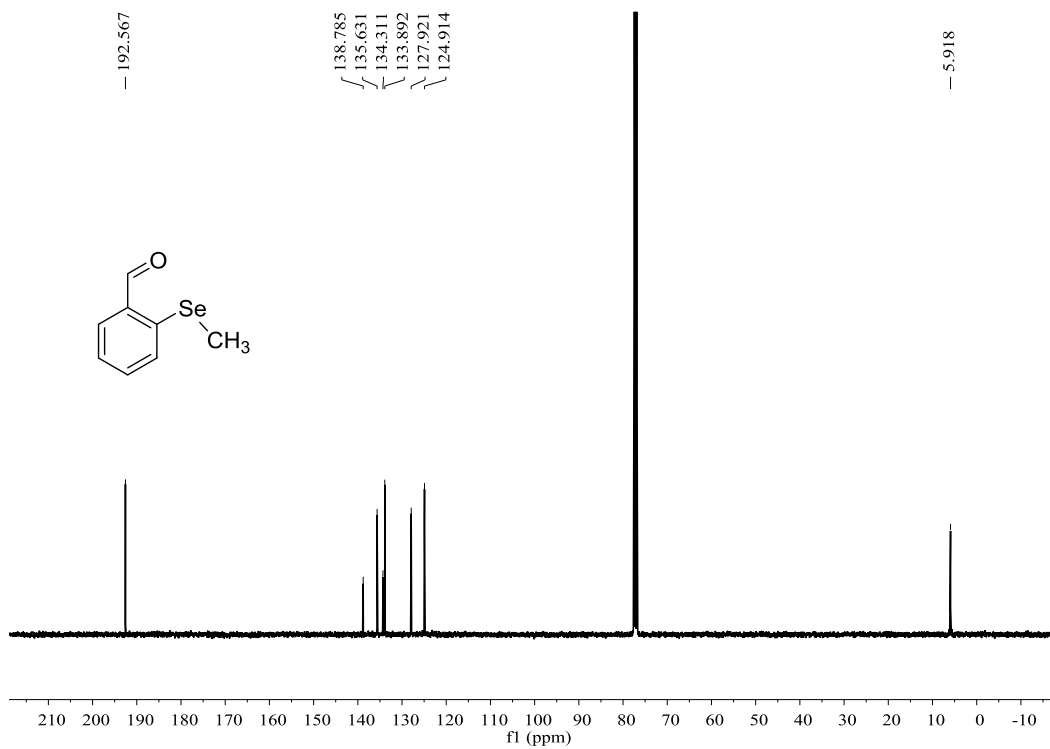

Figure S8.  $^{13}\text{C}$  NMR spectrum of **1**(SeMe) in  $\text{CDCl}_3$ .

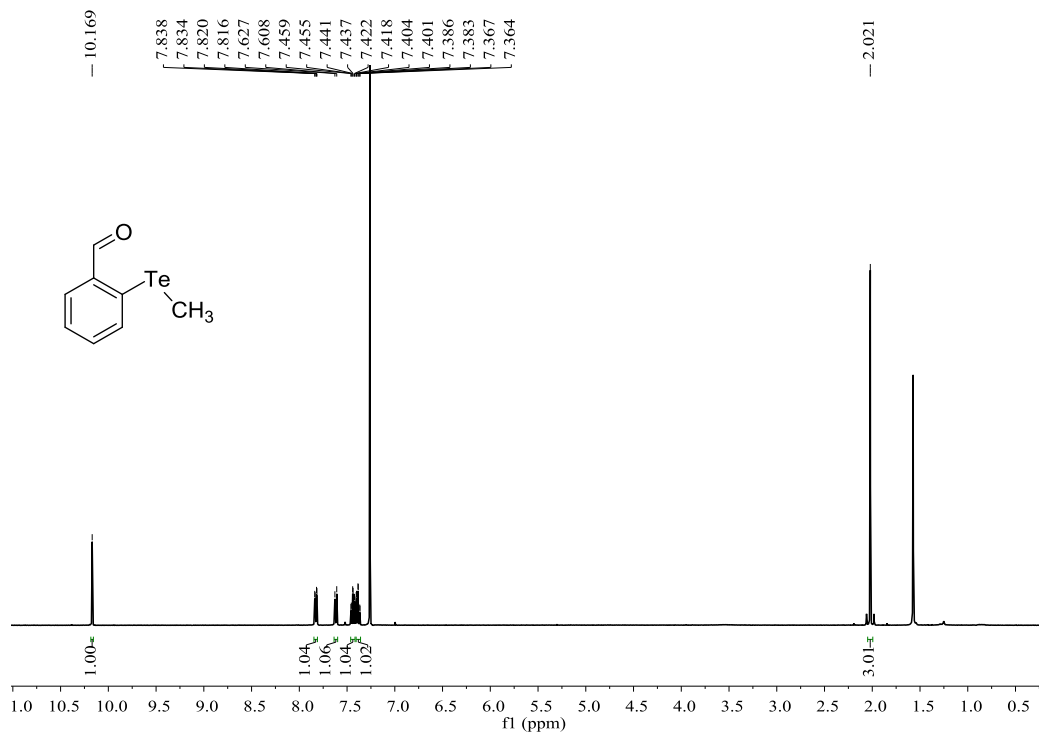

Figure S9.  $^1\text{H}$  NMR spectrum of **1**(TeMe) in  $\text{CDCl}_3$ .

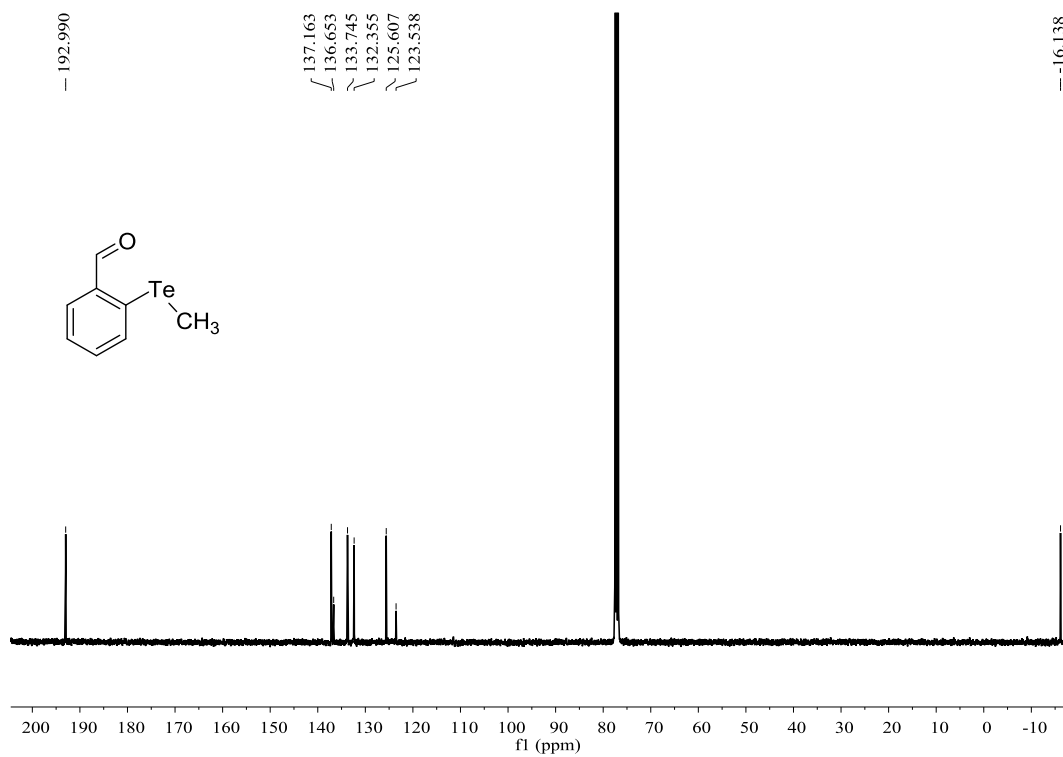

Figure S10.  $^{13}\text{C}$  NMR spectrum of 1(TeMe) in  $\text{CDCl}_3$ .

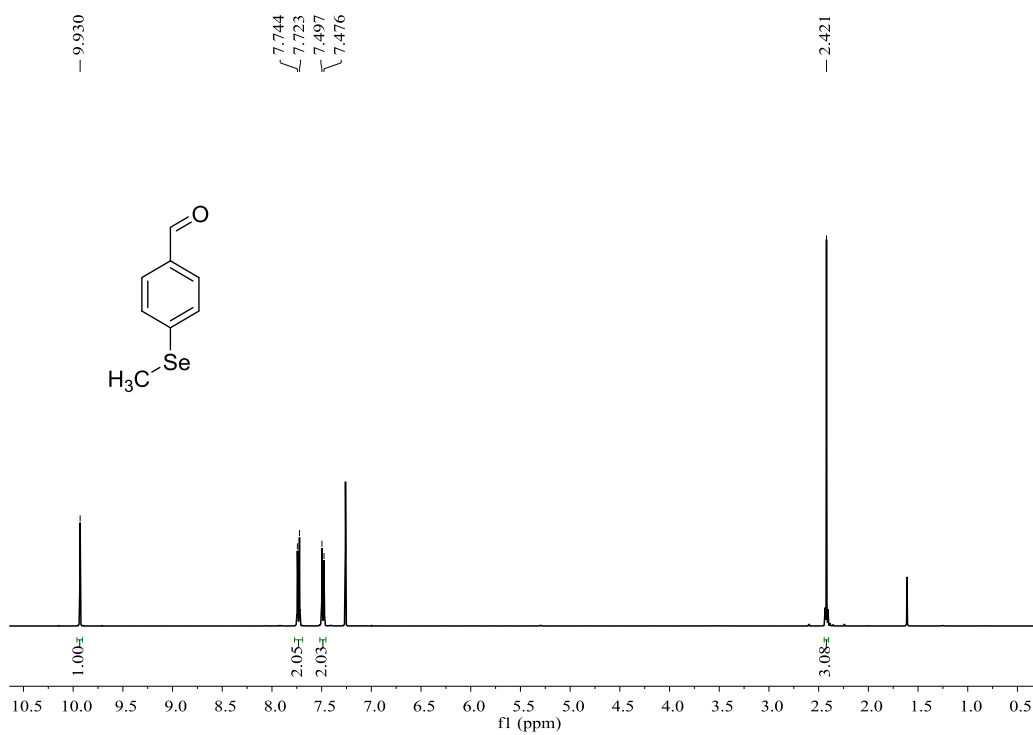

Figure S11.  $^1\text{H}$  NMR spectrum of 2(SeMe) in  $\text{CDCl}_3$ .

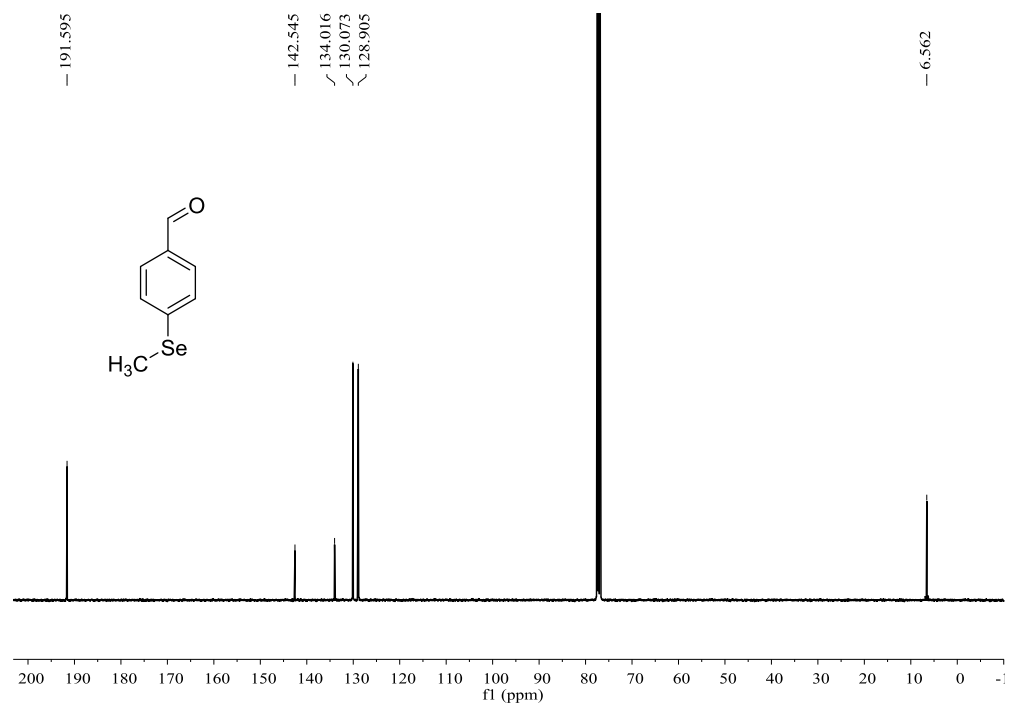

**Figure S12.** <sup>13</sup>C NMR spectrum of 2(SeMe) in CDCl<sub>3</sub>.

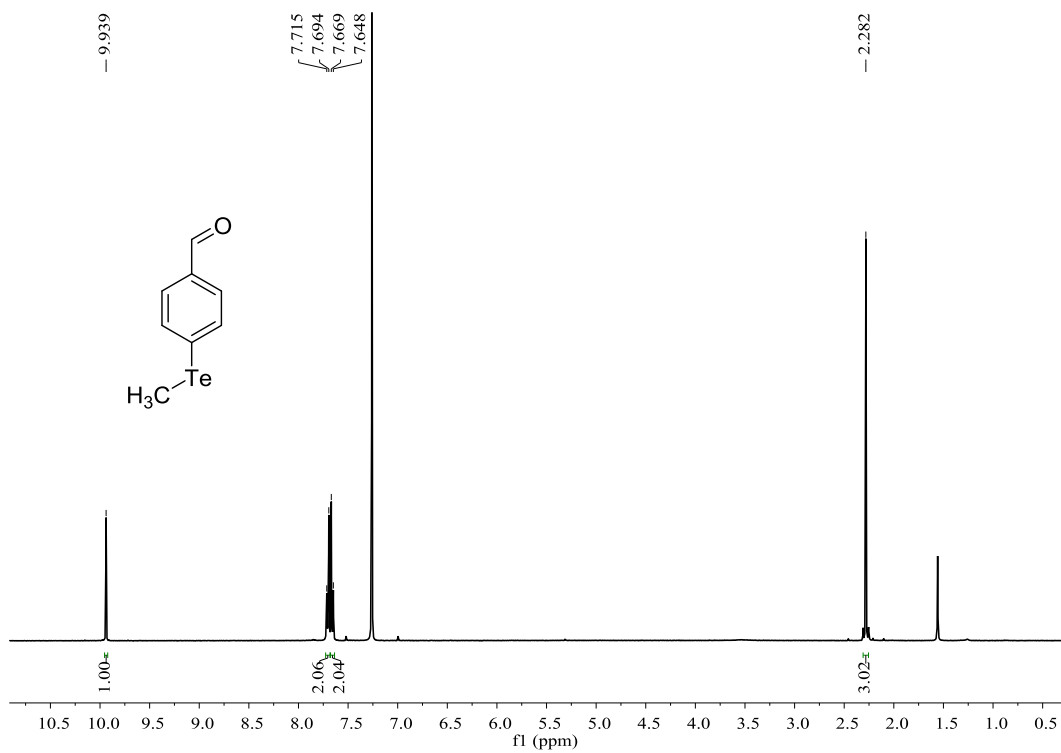

**Figure S13.** <sup>1</sup>H NMR spectrum of 2(TeMe) in CDCl<sub>3</sub>.



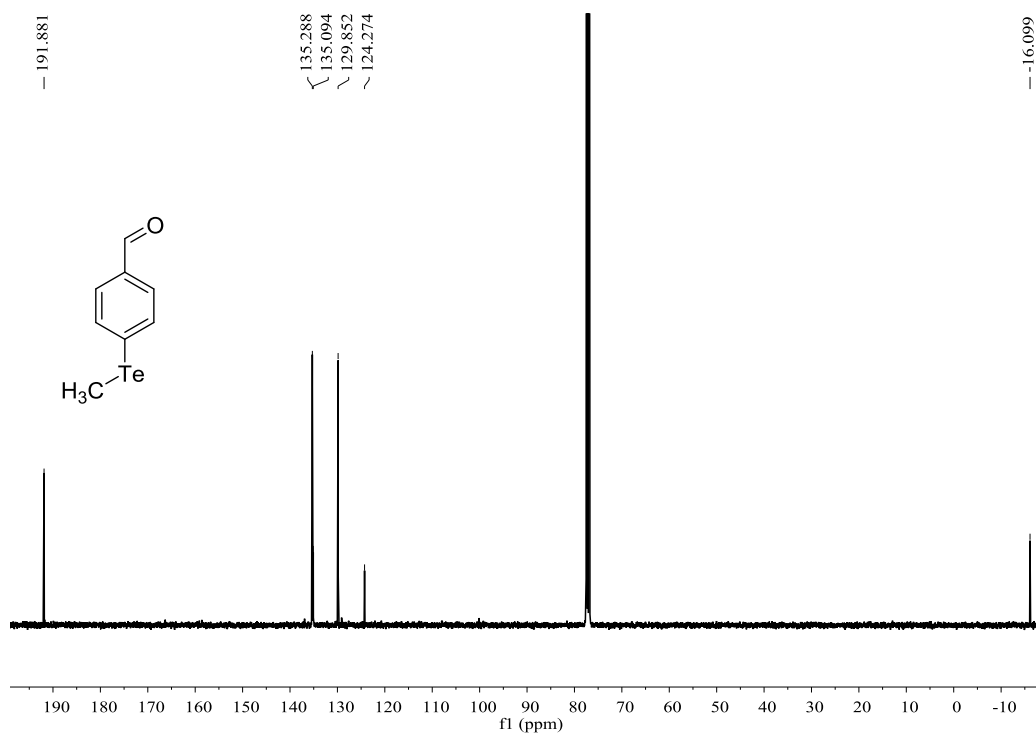

**Figure S14.**  $^{13}\text{C}$  NMR spectrum of 2(TeMe) in  $\text{CDCl}_3$ .

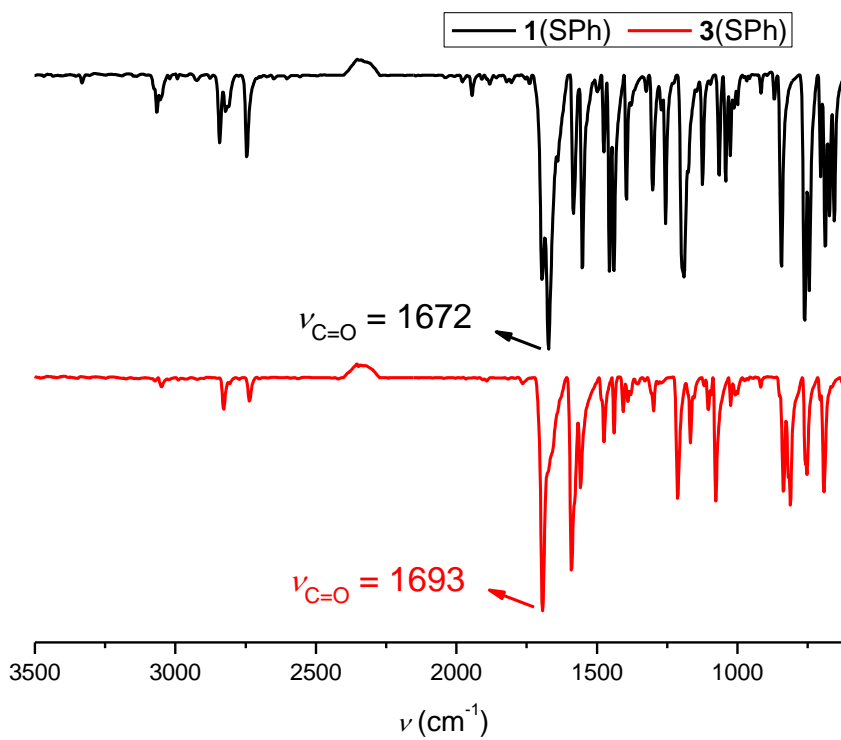

**Figure S15.** IR spectra of 1(SPh) and 3(SPh).

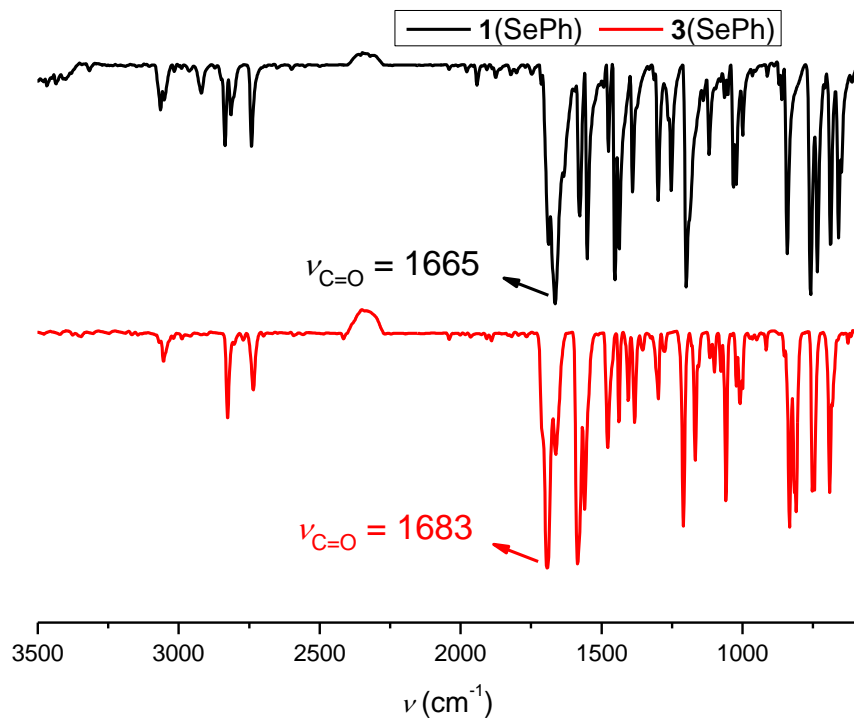

**Figure S16.** IR spectra of **1(SePh)** and **3(SePh)**.

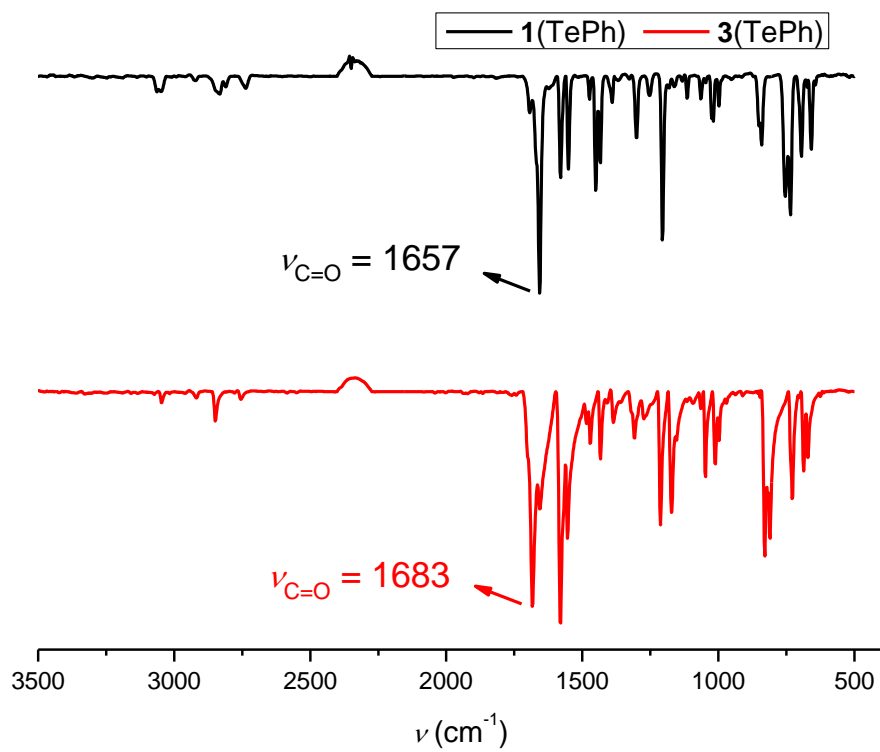

**Figure S17.** IR spectra of **1(TePh)** and **3(TePh)**.

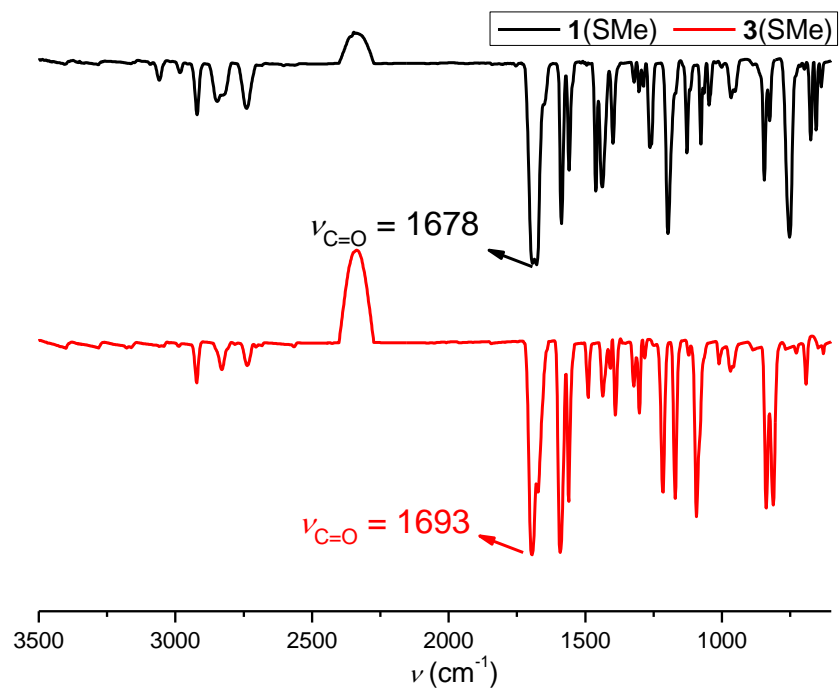

**Figure S18.** IR spectra of **1(SMe)** and **3(SMe)**.

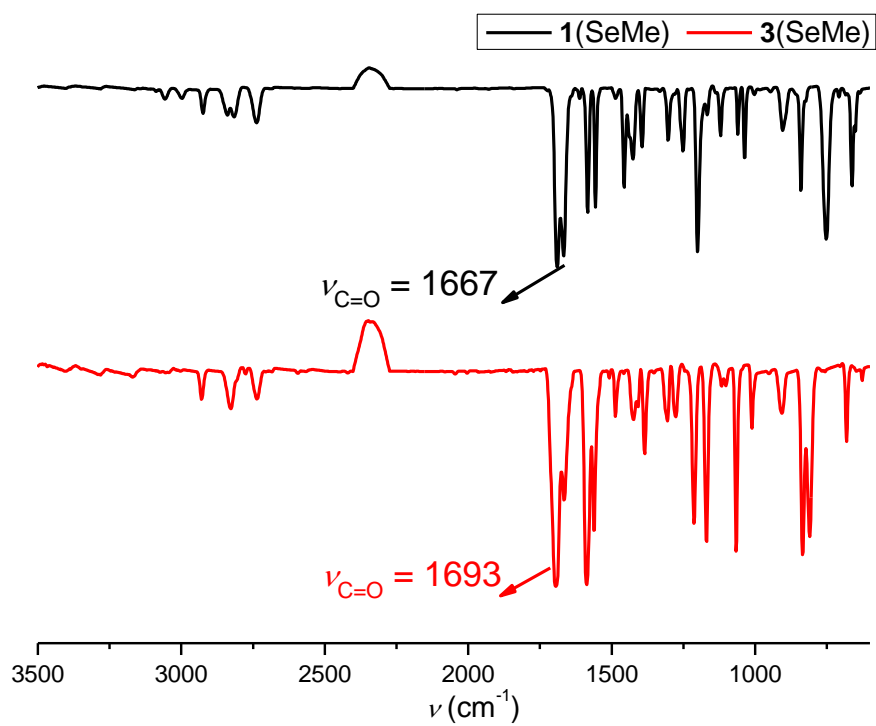

**Figure S19.** IR spectra of **1(SeMe)** and **3(SeMe)**.

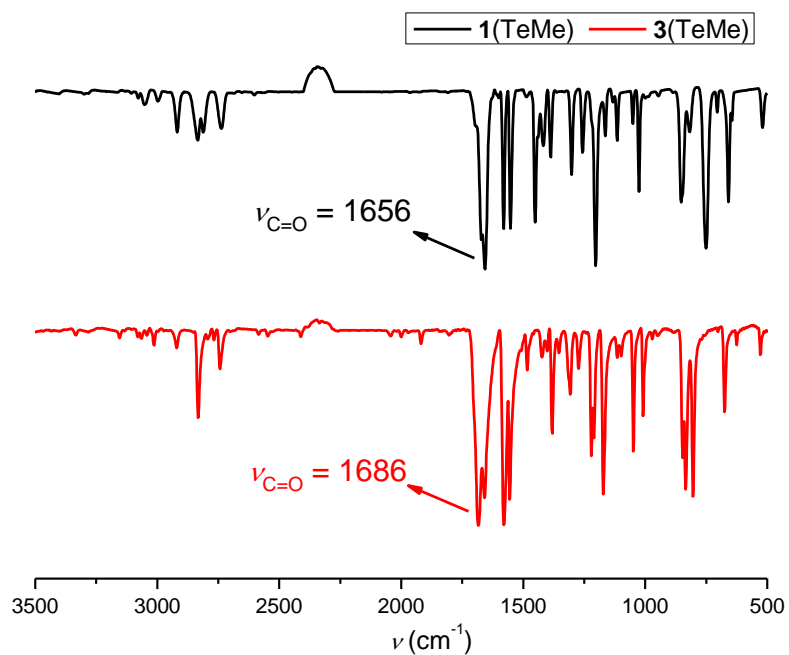

**Figure S20.** IR spectra of **1(TeMe)** and **3(TeMe)**.

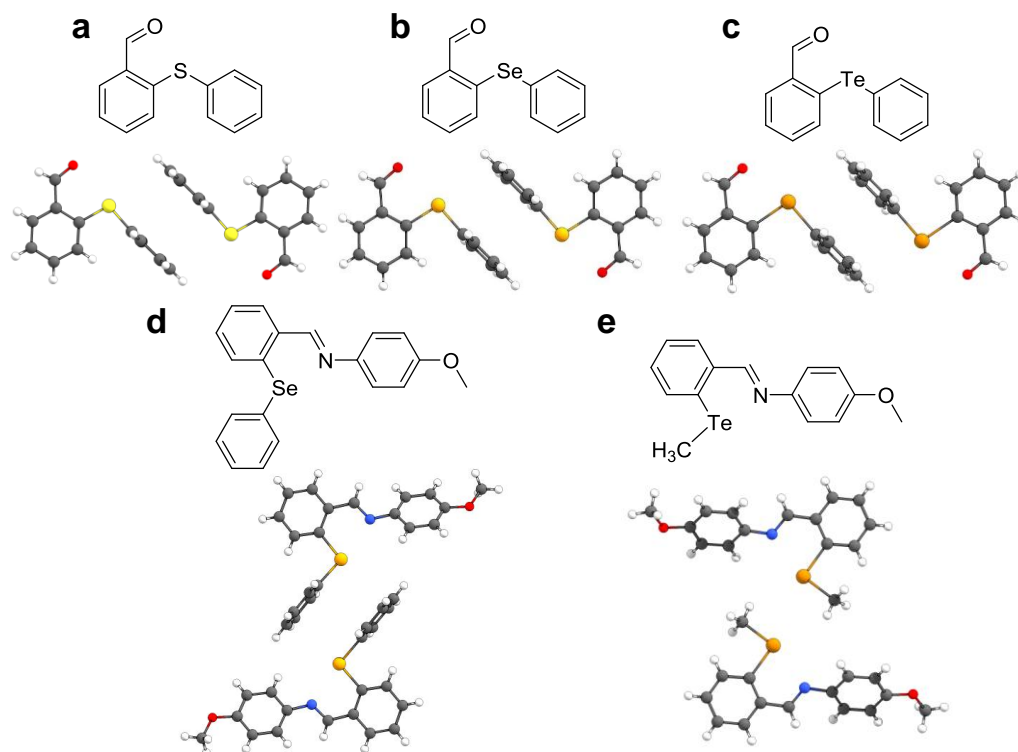

**Figure S21.** Crystal structures of **1(SPh)** (a), **1(SePh)** (b), **1(TePh)** (c), **2(SePh)** (d), and **2(TeMe)** (e).

**Table S1.** Summary of crystallographic data for **1**(ChPh), **2**(SePh).and **2**(TeMe).

|                                                    | <b>1</b> (SPh)                     | <b>1</b> (SePh)                     | <b>1</b> (TePh)                                                | <b>2</b> (SePh)                                                               | <b>2</b> (TeMe)                      |
|----------------------------------------------------|------------------------------------|-------------------------------------|----------------------------------------------------------------|-------------------------------------------------------------------------------|--------------------------------------|
| Formula                                            | C <sub>13</sub> H <sub>10</sub> OS | C <sub>13</sub> H <sub>10</sub> OSe | C <sub>52</sub> H <sub>40</sub> O <sub>4</sub> Te <sub>4</sub> | C <sub>40</sub> H <sub>34</sub> N <sub>2</sub> O <sub>2</sub> Se <sub>2</sub> | C <sub>15</sub> H <sub>15</sub> NOTe |
| Formula weight                                     | 214.29                             | 261.18                              | 1239.24                                                        | 732.61                                                                        | 354.89                               |
| T / K                                              | 293                                | 173                                 | 293                                                            | 293                                                                           | 293                                  |
| Crystallization solvent                            | Cyclohexane                        | CH <sub>3</sub> CN                  | Cyclohexane                                                    | CH <sub>3</sub> CN                                                            | CH <sub>3</sub> CN                   |
| Color                                              | Yellow                             | Yellow                              | Yellow                                                         | Yellow                                                                        | Yellow                               |
| Crystal system                                     | monoclinic                         | monoclinic                          | Triclinic                                                      | monoclinic                                                                    | monoclinic                           |
| Space group                                        | <i>P</i> 2 <sub>1</sub> / <i>n</i> | <i>P</i> 2 <sub>1</sub> / <i>n</i>  | <i>P</i> -1                                                    | <i>P</i> 2 <sub>1</sub>                                                       | <i>P</i> 2 <sub>1</sub> / <i>n</i>   |
| <i>a</i> / Å                                       | 8.015(4)                           | 7.970(3)                            | 10.316(10)                                                     | 11.837(4)                                                                     | 11.210(3)                            |
| <i>b</i> / Å                                       | 17.042(8)                          | 17.025(8)                           | 14.674(2)                                                      | 9.820(4)                                                                      | 8.764(3)                             |
| <i>c</i> / Å                                       | 8.046(4)                           | 8.191(4)                            | 15.854(10)                                                     | 15.814(5)                                                                     | 14.297(4)                            |
| <i>α</i> / °                                       | 90.00                              | 90.00                               | 86.359(10)                                                     | 90.00                                                                         | 90.00                                |
| <i>β</i> / °                                       | 95.110(8)                          | 96.584(4)                           | 85.562(10)                                                     | 110.667(4)                                                                    | 95.914(3)                            |
| <i>γ</i> / °                                       | 90.00                              | 90.00                               | 77.915(10)                                                     | 90.00                                                                         | 90.00                                |
| <i>V</i> / Å <sup>3</sup>                          | 1094.6(9)                          | 1104.0(9)                           | 2336.8(4)                                                      | 1719.7(11)                                                                    | 1397.2(7)                            |
| <i>Z</i>                                           | 4                                  | 4                                   | 2                                                              | 2                                                                             | 4                                    |
| <i>D</i> <sub>x</sub> / g cm <sup>-3</sup>         | 1.300                              | 1.571                               | 1.761                                                          | 1.415                                                                         | 1.687                                |
| <i>μ</i> / mm <sup>-1</sup>                        | 0.263                              | 2.982                               | 13.420                                                         | 2.031                                                                         | 11.428                               |
| <i>F</i> (000)                                     | 448                                | 520                                 | 1184                                                           | 744                                                                           | 692                                  |
| <i>θ</i> range / °                                 | 2.39 to 27.44                      | 4.52 to 48.87                       | 2.43 to 60.572                                                 | 2.61 to 59.82                                                                 | 5.14 to 60.32                        |
| GOF on <i>F</i> <sup>2</sup>                       | 0.980                              | 1.060                               | 0.986                                                          | 0.983                                                                         | 1.087                                |
| <i>R</i> <sub>1</sub> [ <i>I</i> > 2σ( <i>I</i> )] | 0.0421                             | 0.0289                              | 0.0439                                                         | 0.0470                                                                        | 0.0317                               |
| <i>wR</i> <sub>2</sub> (all data)                  | 0.1216                             | 0.0782                              | 0.1217                                                         | 0.1293                                                                        | 0.932                                |

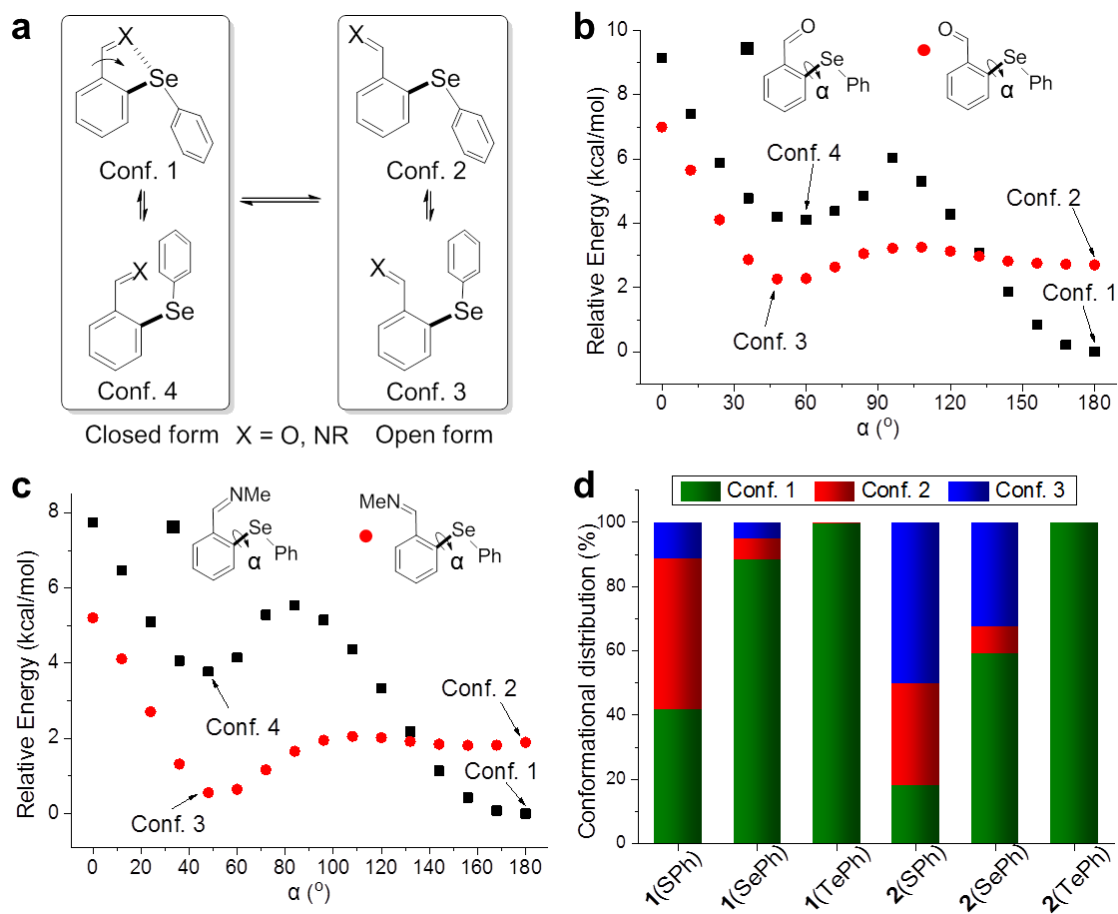

**Figure S22.** (a) The open and closed conformations of **1**(SePh) and **2**(SePh). (b) The plot of energies of open and closed conformers of **1**(SePh) versus  $\alpha$ . (c) The plot of energies of open and closed conformers of **2**(SePh) versus  $\alpha$ . (d) Comparison of conformer distribution of **1**(ChPh) and **2**(ChPh).

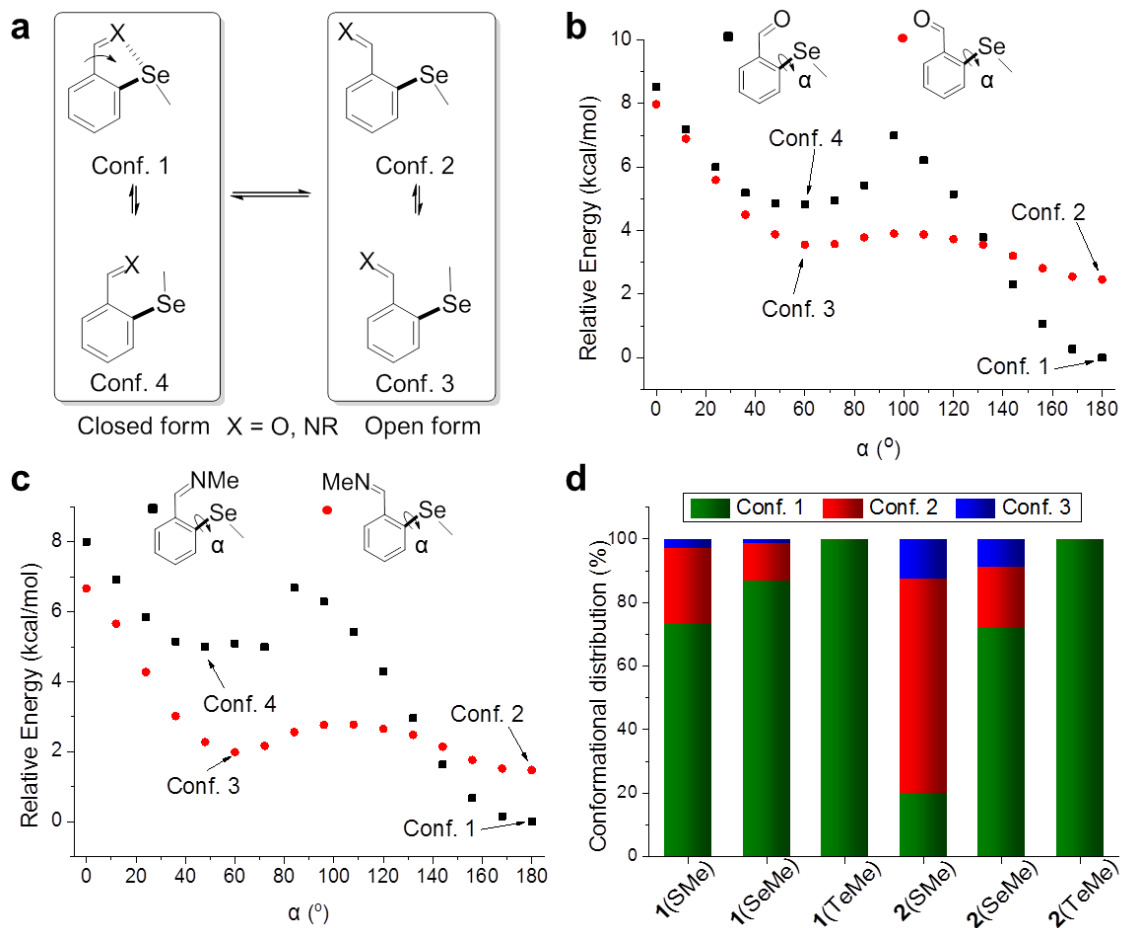

**Figure S23.** (a) The open and closed conformations of **1**(SeMe) and **2**(SeMe). (b) The plot of electronic energies of open and closed conformers of **1**(SeMe) versus  $\alpha$ . (c) The plot of electronic energies of open and closed conformers of **2**(SeMe) versus  $\alpha$ .  $\alpha$  is defined with the rotation about C-SeMe bond (bold). (d) Comparison of conformer distribution of **1**(ChMe) and **2**(ChMe).

### 3. Dynamic Covalent Reactions

#### (1) Imine formation

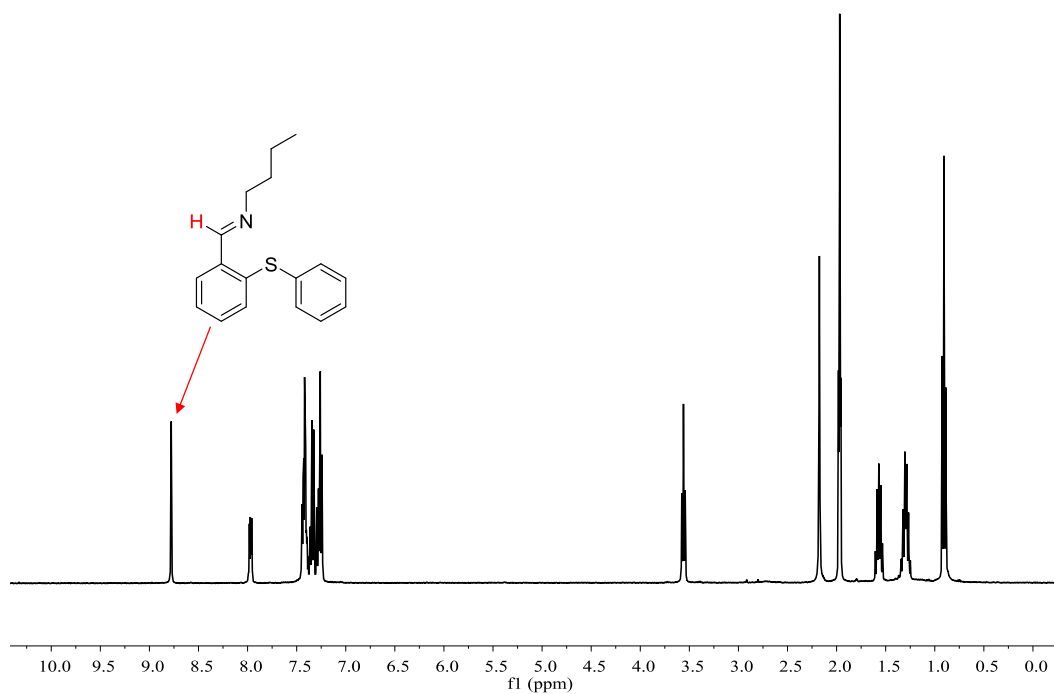

**Figure S24.** <sup>1</sup>H NMR spectrum of the reaction of **1**(SPh) and 1-butylamine in CD<sub>3</sub>CN.

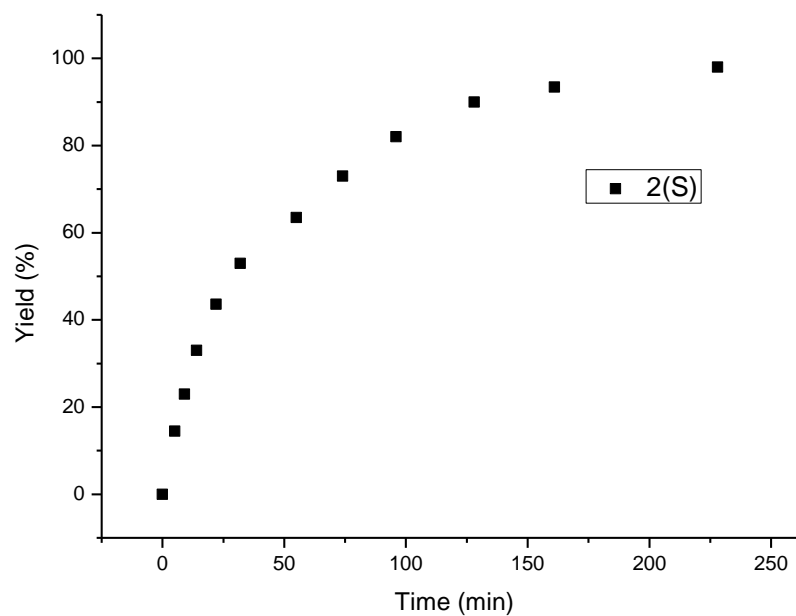

**Figure S25.** Kinetic profile of the reaction of **1**(SPh) and 1-butylamine in CD<sub>3</sub>CN.



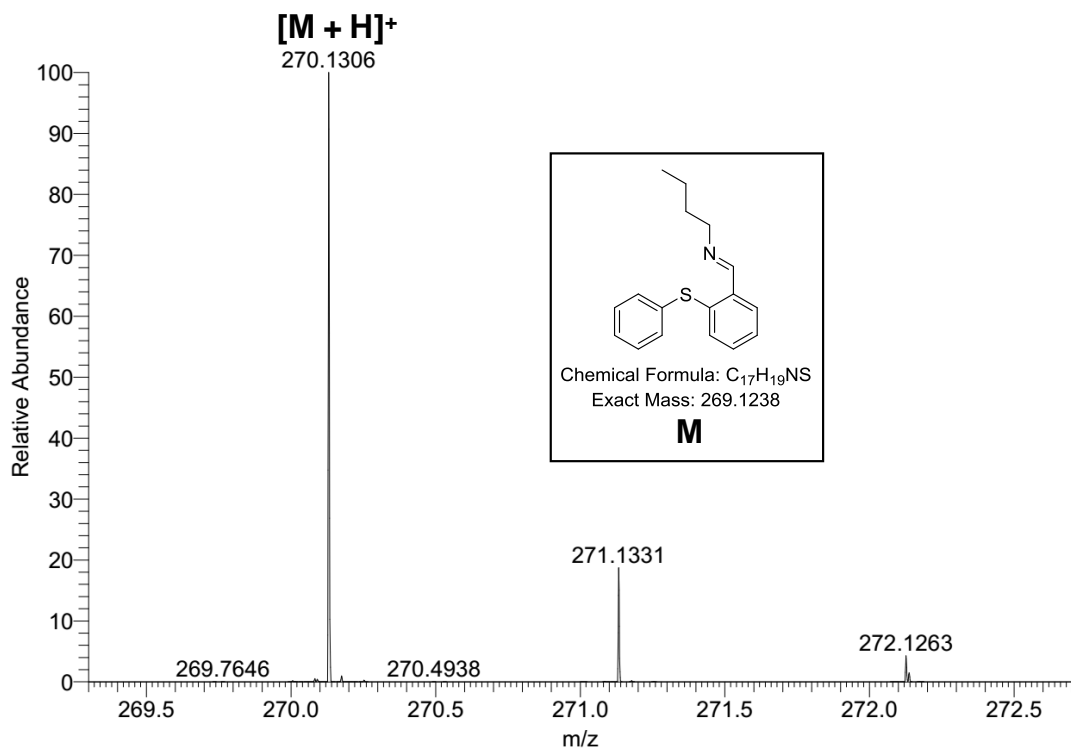

**Figure S26.** ESI-MS spectrum of the reaction of **1**(SPh) and 1-butylamine in  $CD_3CN$ .

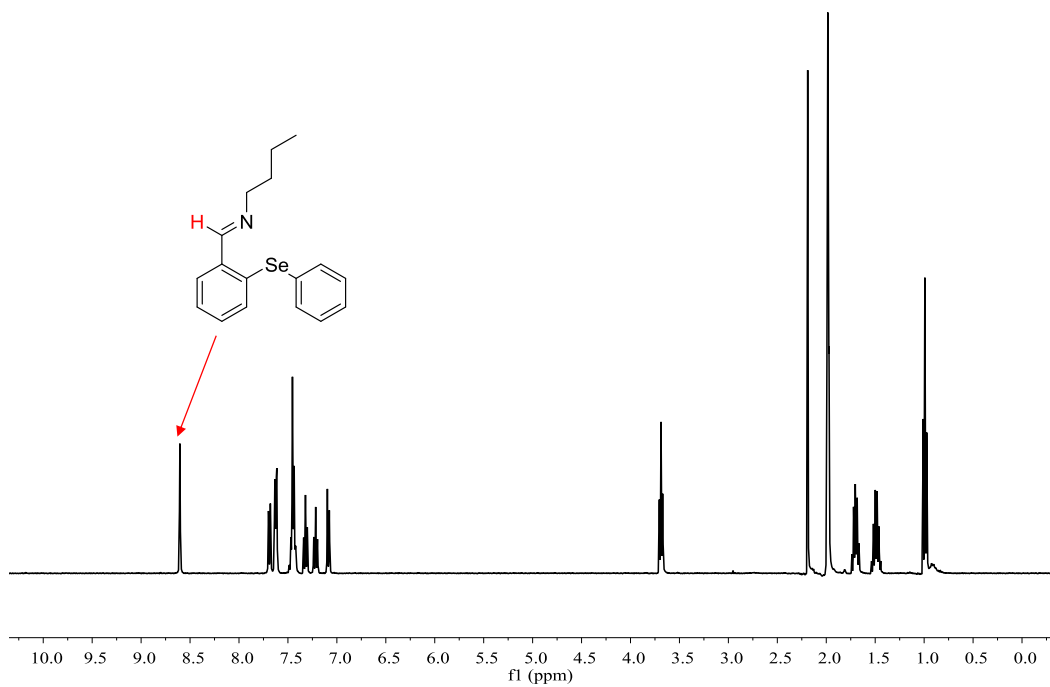

**Figure S27.**  $^1H$  NMR spectrum of the reaction of **1**(SePh) and 1-butylamine in  $CD_3CN$ .

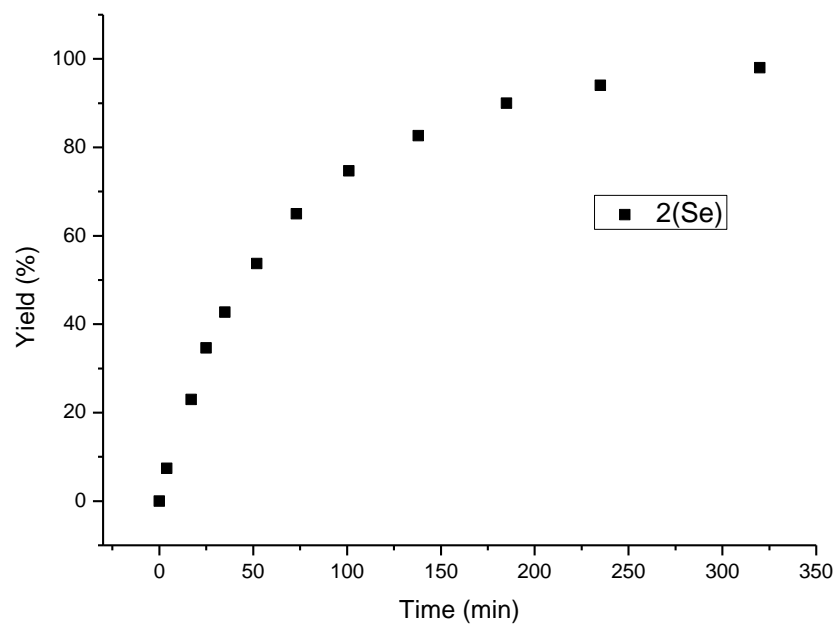

**Figure S28.** Kinetic profile of the reaction of **1(SePh)** and 1-butylamine in  $\text{CD}_3\text{CN}$ .

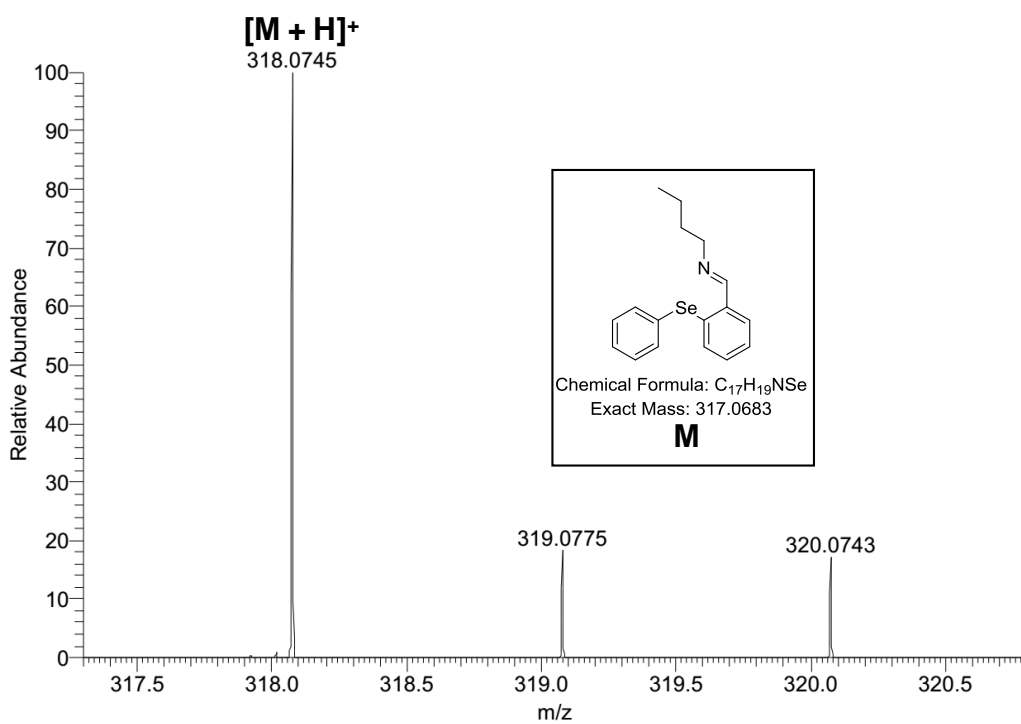

**Figure S29.** ESI-MS spectrum of the reaction of **1(SePh)** and 1-butylamine in  $\text{CD}_3\text{CN}$ .

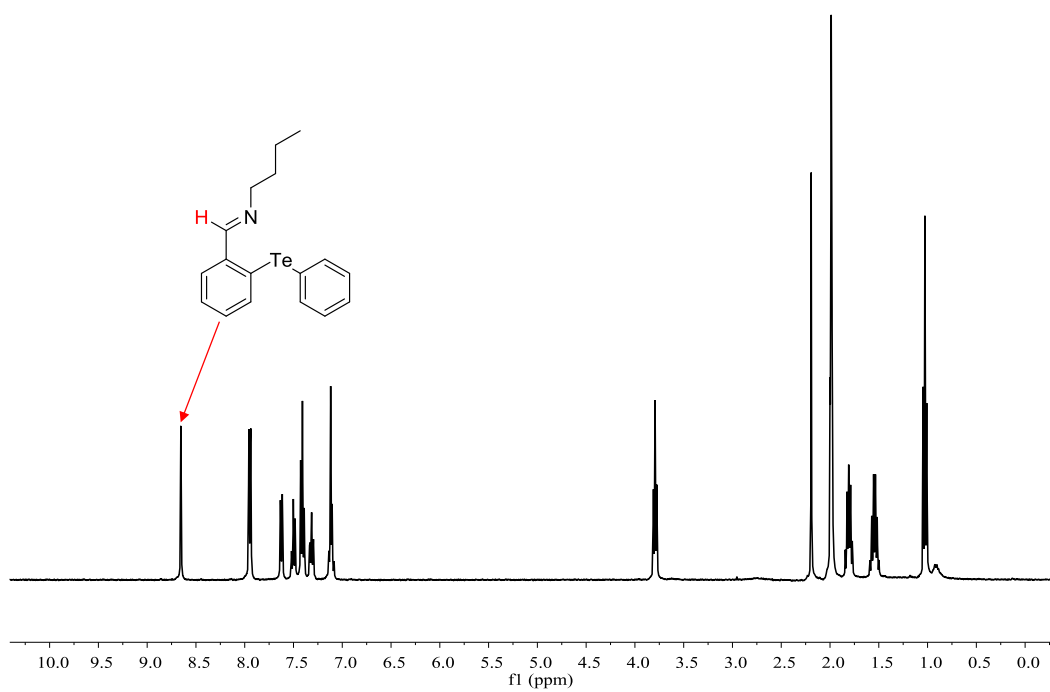

**Figure S30.**  $^1\text{H}$  NMR spectrum of the reaction of **1(TePh)** and 1-butylamine in  $\text{CD}_3\text{CN}$ .

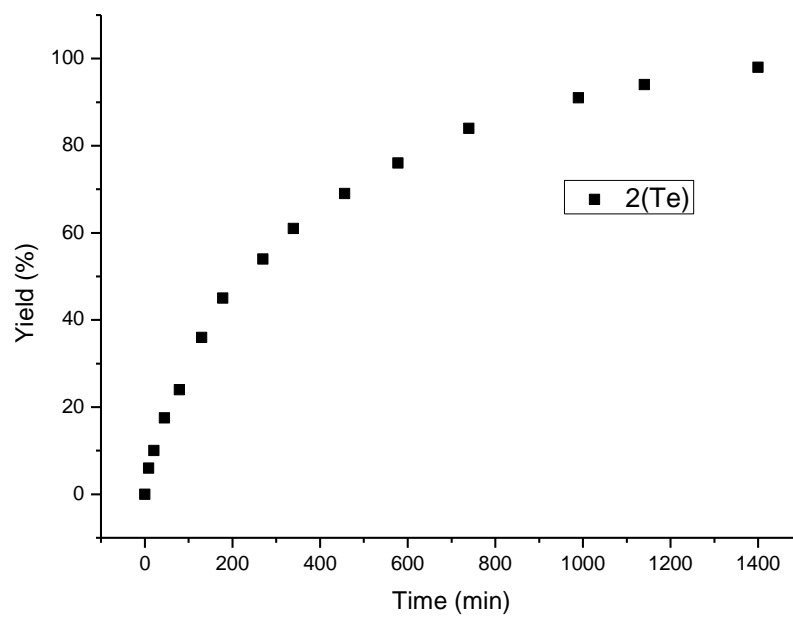

**Figure S31.** Kinetic profile of the reaction of **1(TePh)** and 1-butylamine in  $\text{CD}_3\text{CN}$ .

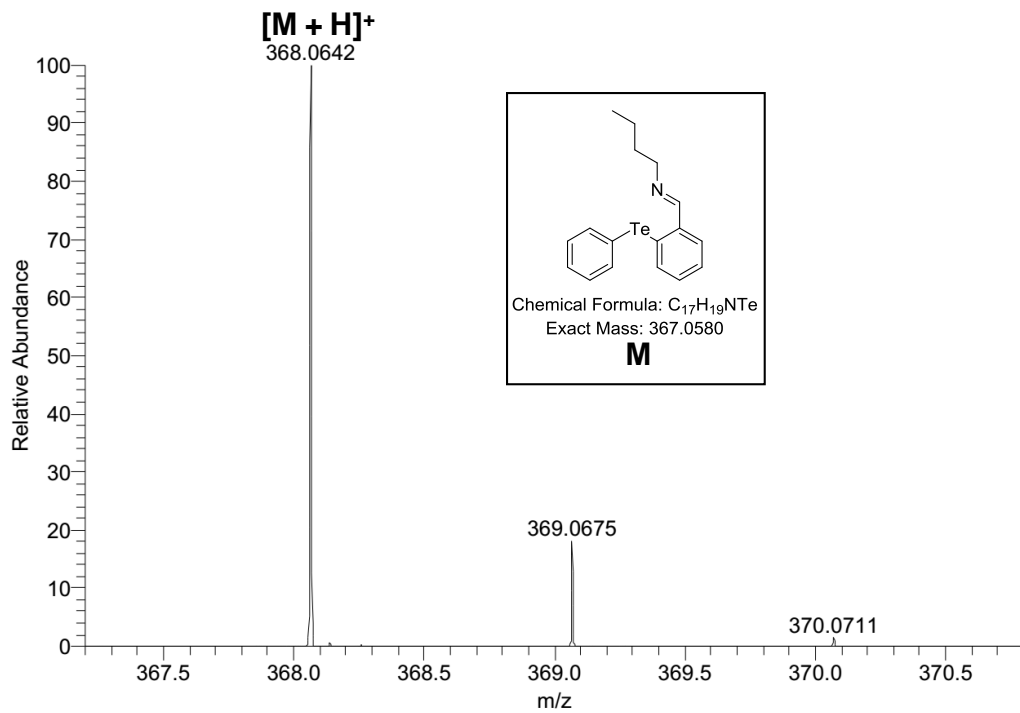

**Figure S32.** ESI-MS spectrum of the reaction of **1**(TePh) and 1-butylamine in  $CD_3CN$ .

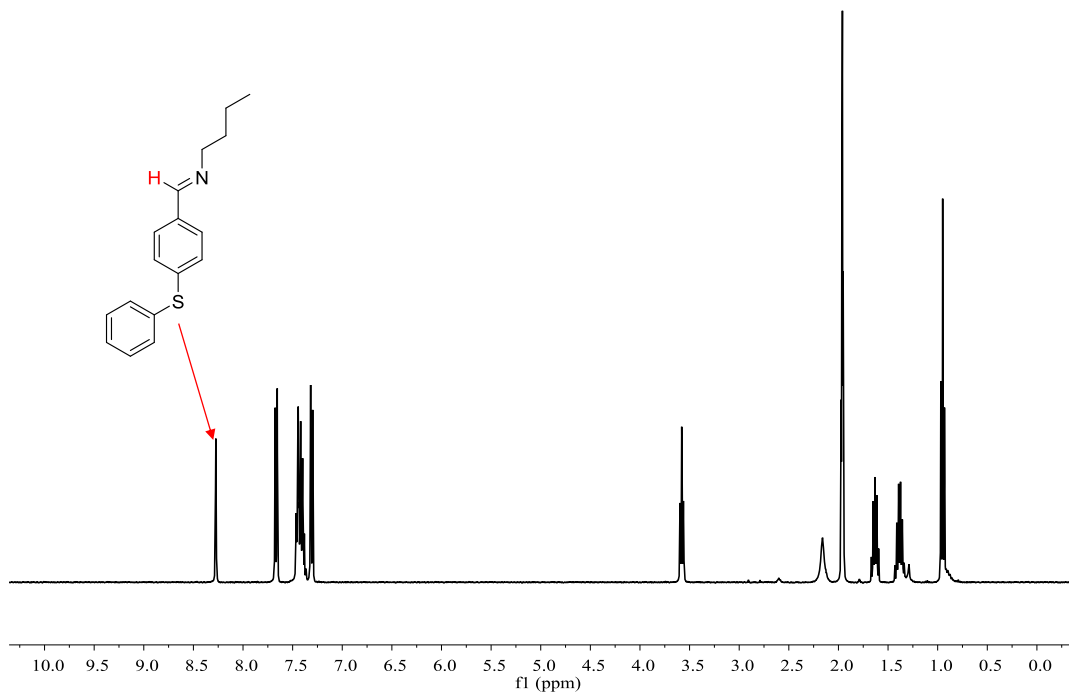

**Figure S33.**  $^1H$  NMR spectrum of the reaction of **3**(SPh) and 1-butylamine in  $CD_3CN$ .

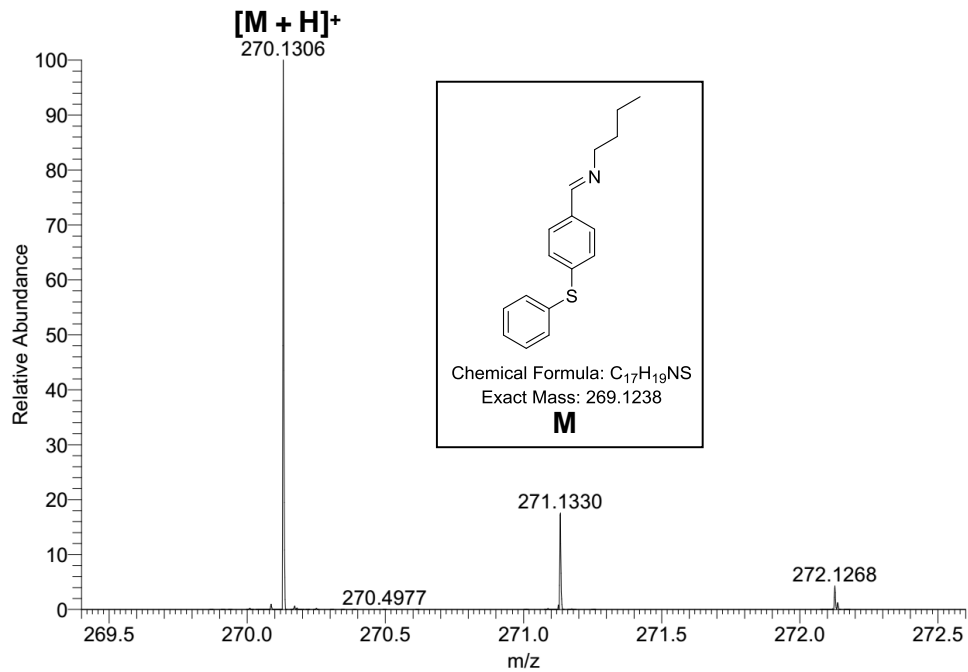

**Figure S34.** ESI-MS spectrum of the reaction of **3**(SPh) and 1-butylamine in CD<sub>3</sub>CN.

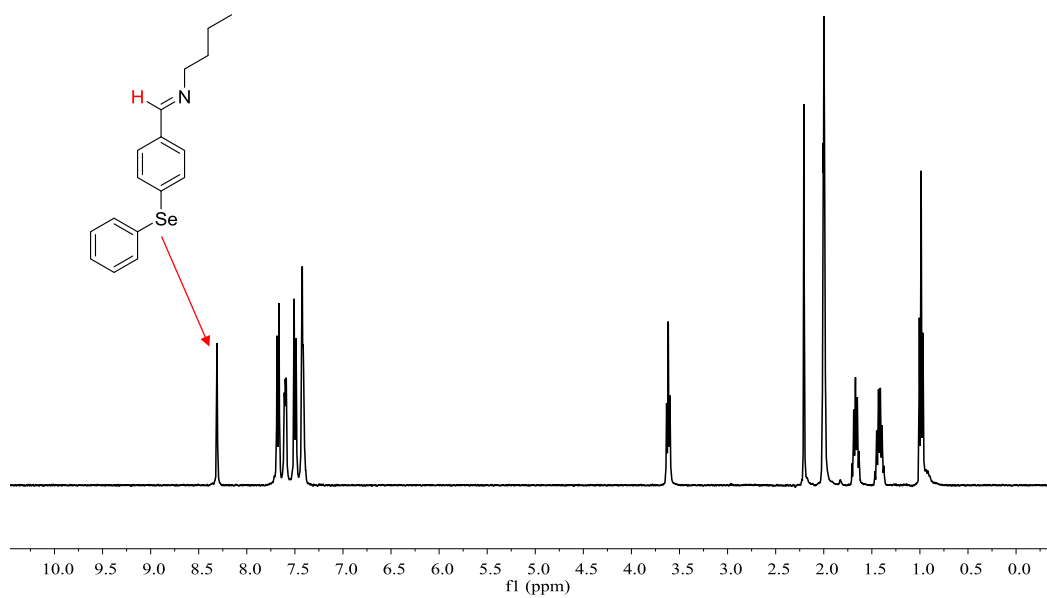

**Figure S35.** <sup>1</sup>H NMR spectrum of the reaction of **3**(SePh) and 1-butylamine in CD<sub>3</sub>CN.

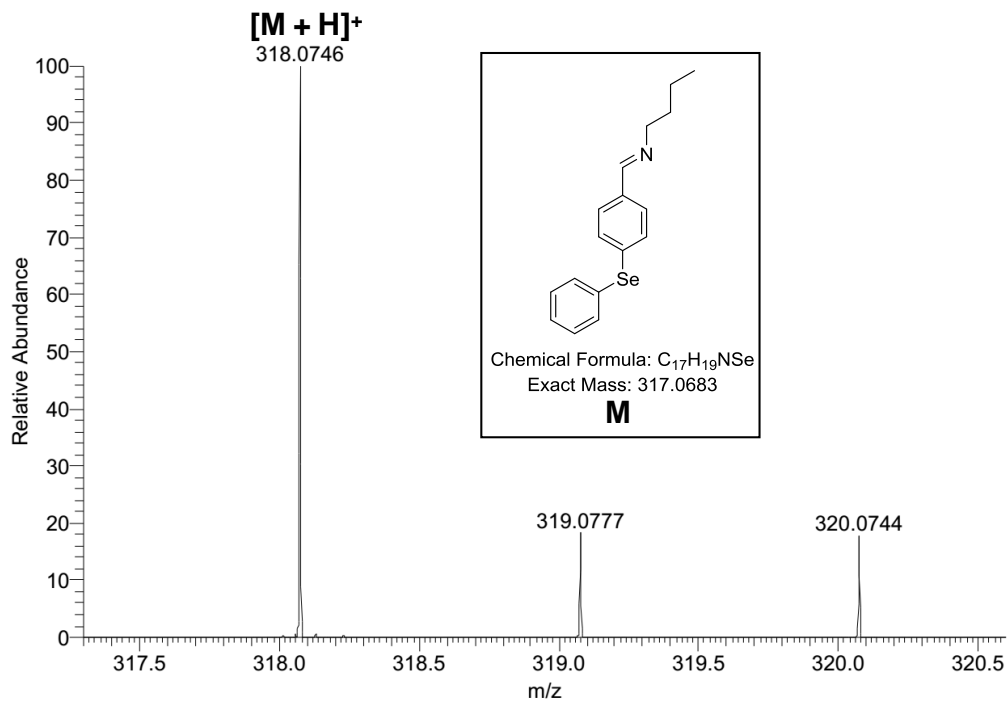

**Figure S36.** ESI-MS spectrum of the reaction of **3**(SePh) and 1-butylamine in  $CD_3CN$ .

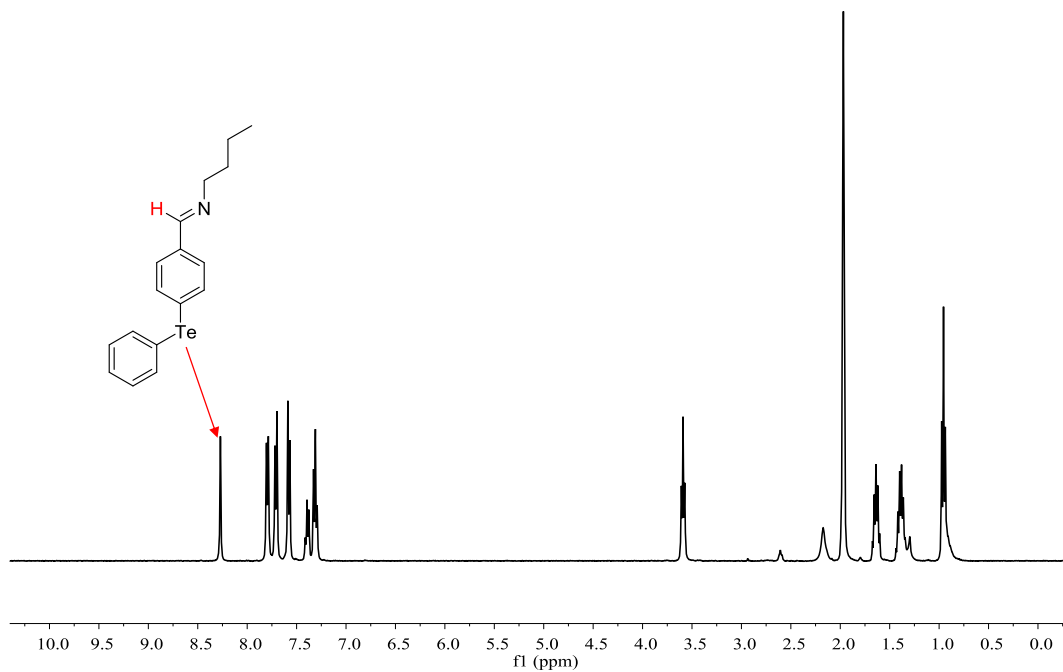

**Figure S37.**  $^1H$  NMR spectrum of the reaction of **3**(TePh) and 1-butylamine in  $CD_3CN$ .

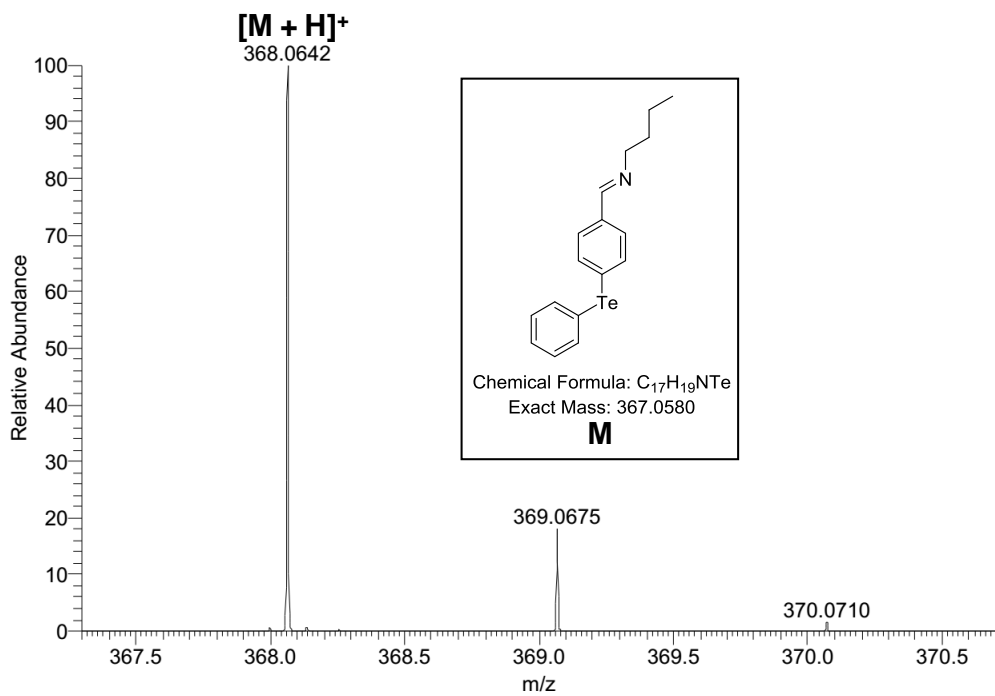

**Figure S38.** ESI-MS spectrum of the reaction of **3**(TePh) and 1-butylamine in  $CD_3CN$ .

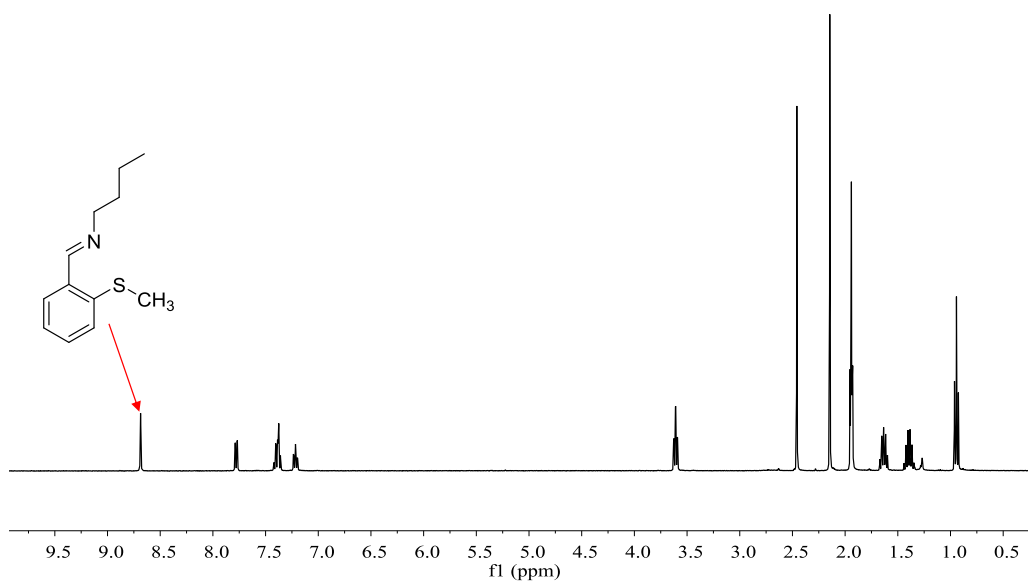

**Figure S39.**  $^1H$  NMR spectrum of the reaction of **1**(SMe) and 1-butylamine in  $CD_3CN$ .

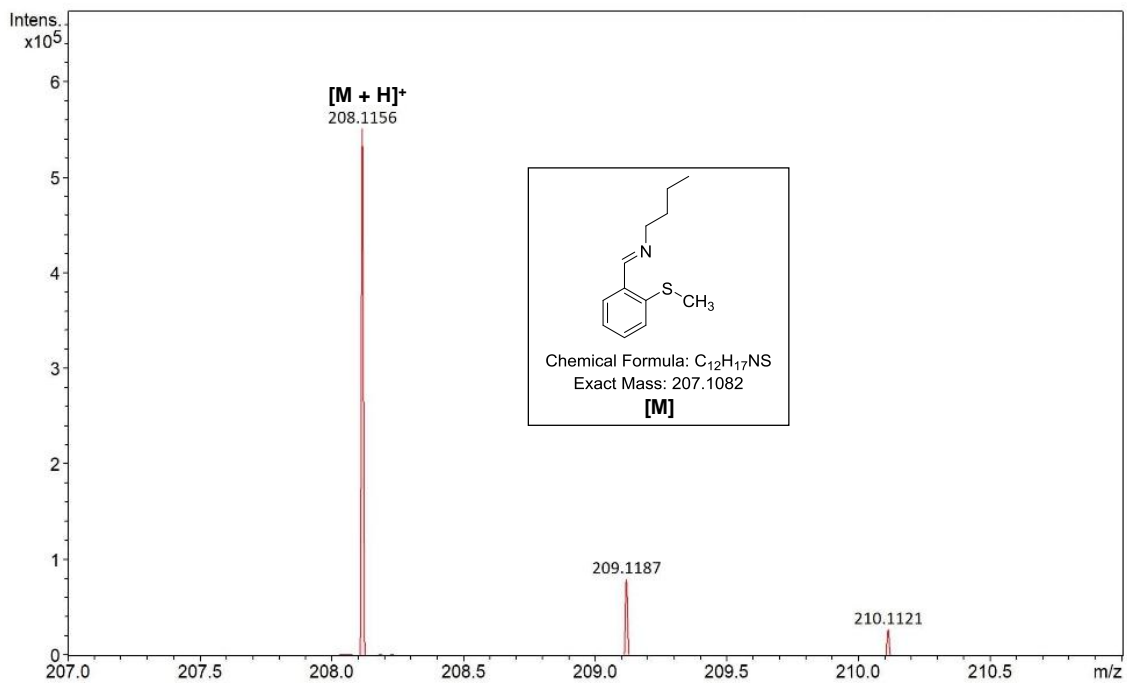

**Figure S40.** ESI-MS spectrum of the reaction of **1**(SMe) and 1-butylamine in CD<sub>3</sub>CN.

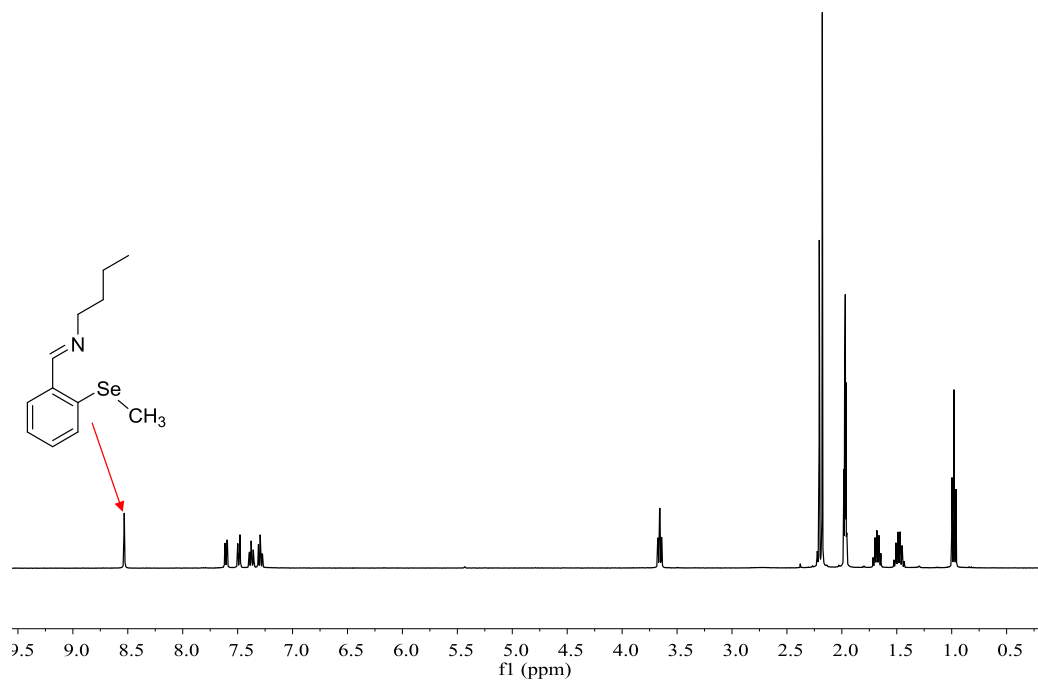

**Figure S41.** <sup>1</sup>H NMR spectrum of the reaction of **1**(SeMe) and 1-butylamine in CD<sub>3</sub>CN.



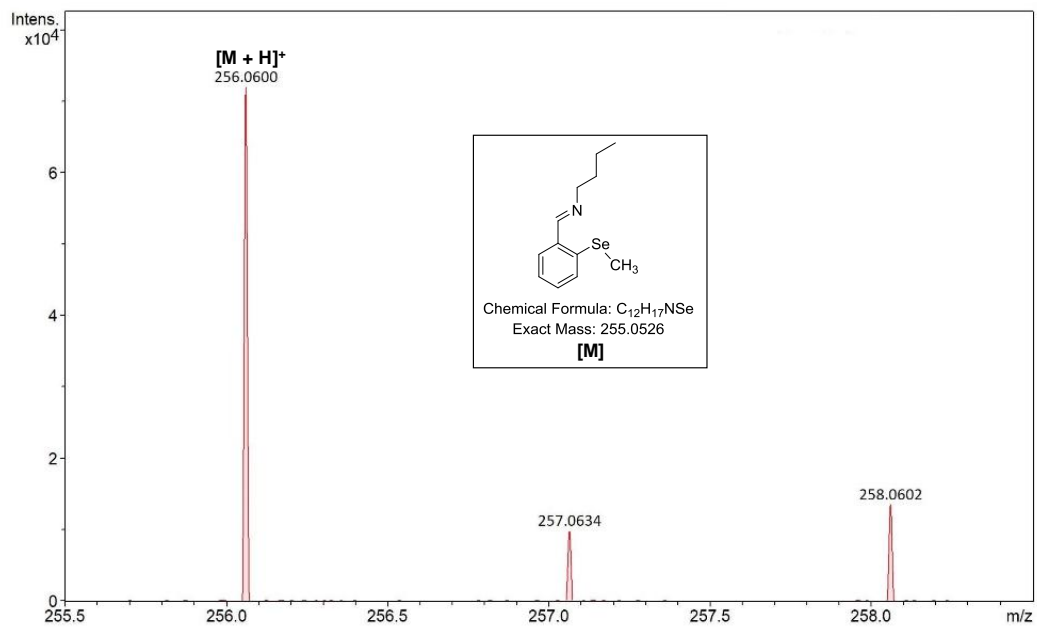

**Figure S42.** ESI-MS spectrum of the reaction of **1**(SeMe) and 1-butylamine in CD<sub>3</sub>CN.

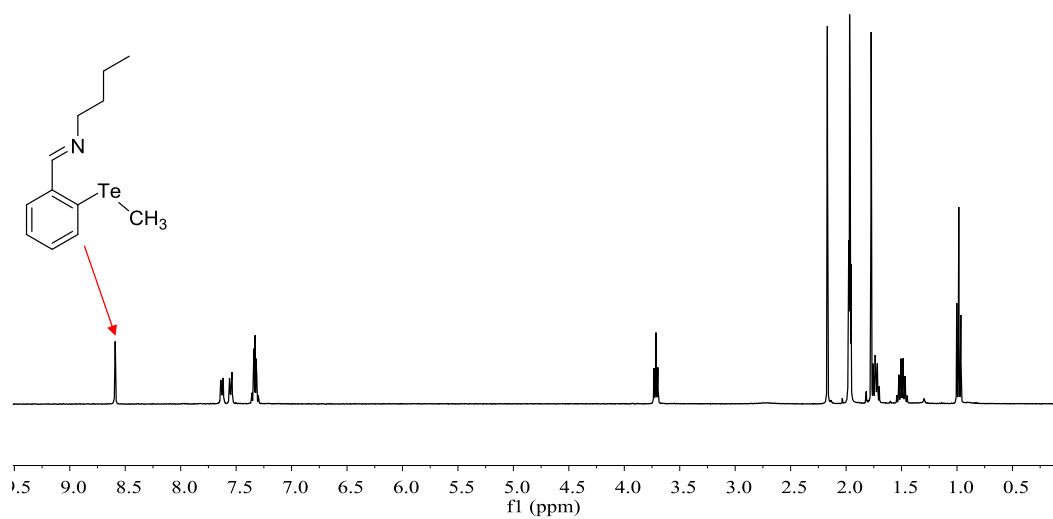

**Figure S43.** <sup>1</sup>H NMR spectrum of the reaction of **1**(TeMe) and 1-butylamine in CD<sub>3</sub>CN.

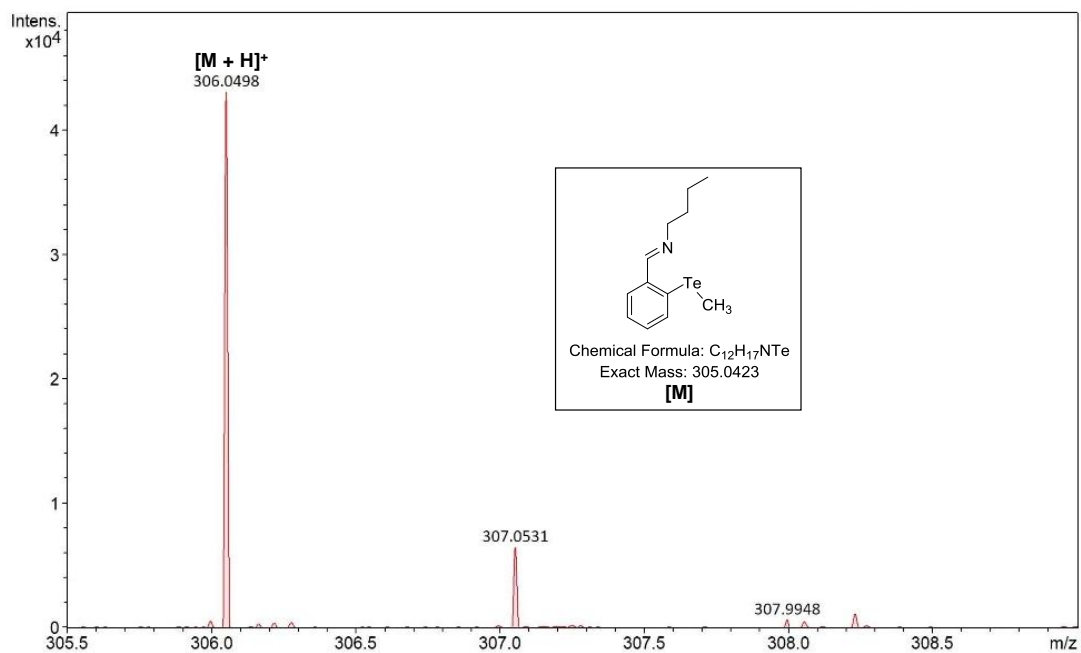

**Figure S44.** ESI-MS spectrum of the reaction of **1**(TeMe) and 1-butylamine in CD<sub>3</sub>CN.

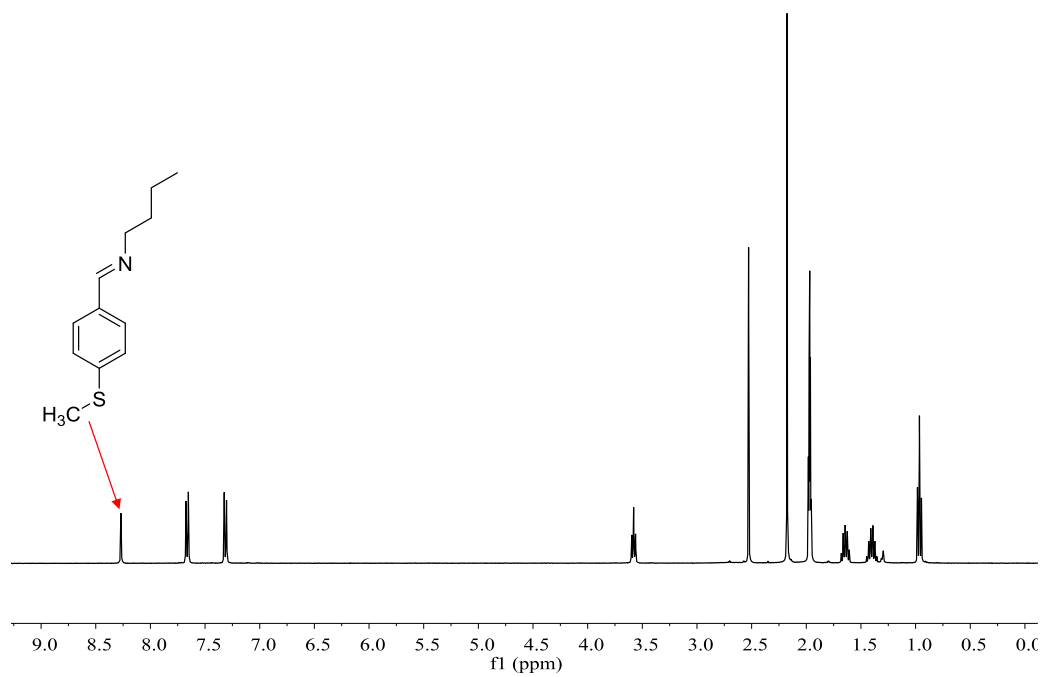

**Figure S45.** <sup>1</sup>H NMR spectrum of the reaction of **3**(SMe) and 1-butylamine in CD<sub>3</sub>CN.

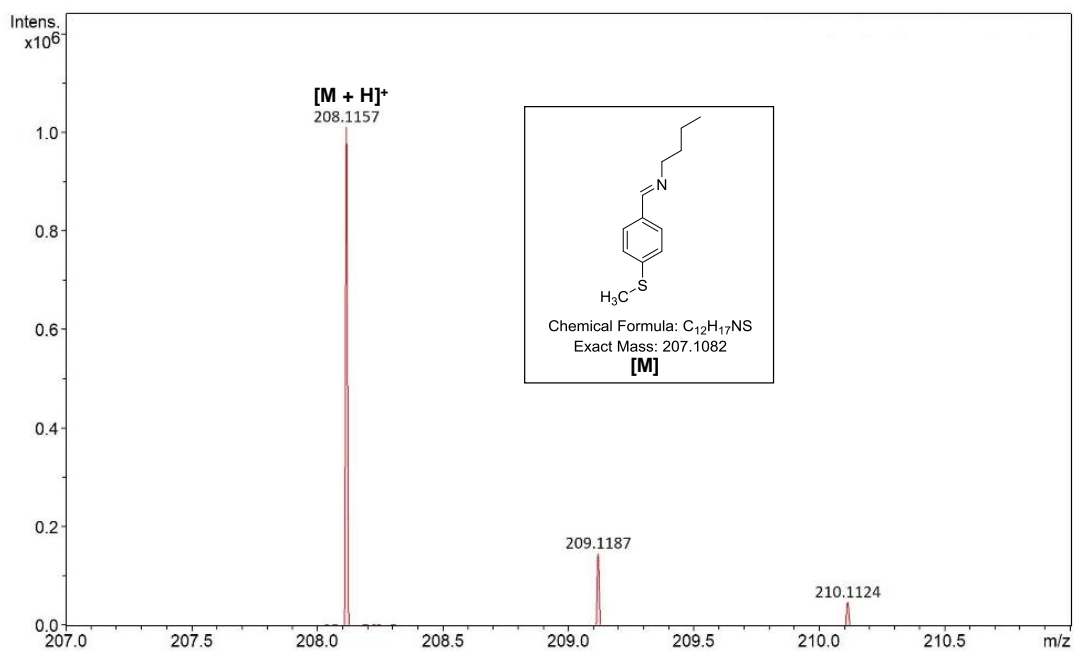

**Figure S46.** ESI-MS spectrum of the reaction of **3(SMe)** and 1-butylamine in CD<sub>3</sub>CN.

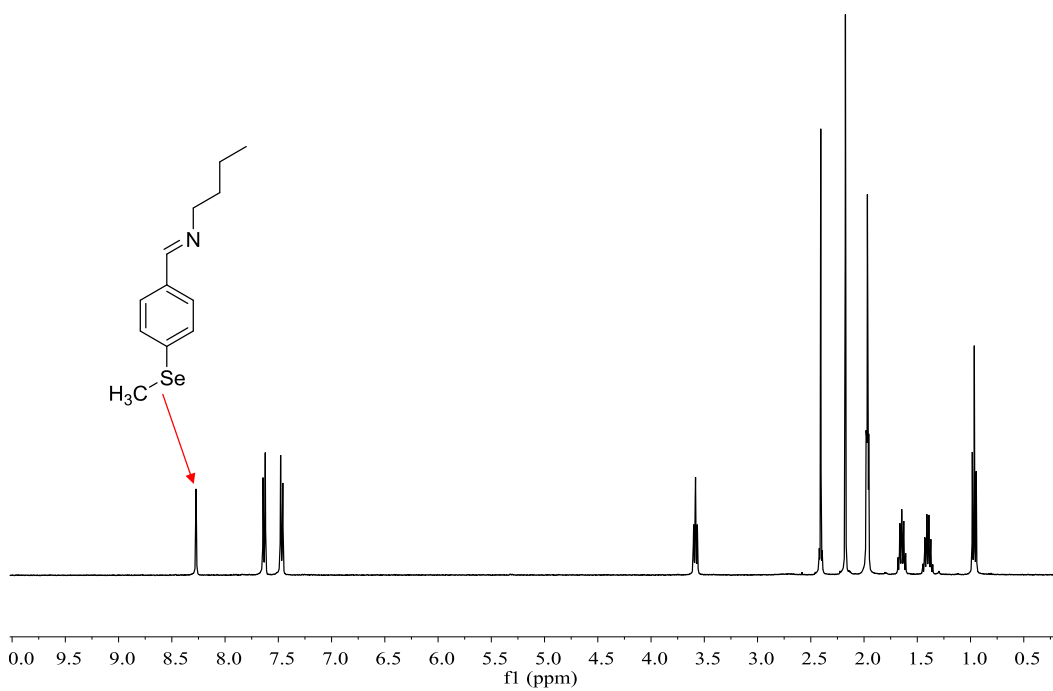

**Figure S47.** <sup>1</sup>H NMR spectrum of the reaction of **3(SeMe)** and 1-butylamine in CD<sub>3</sub>CN.

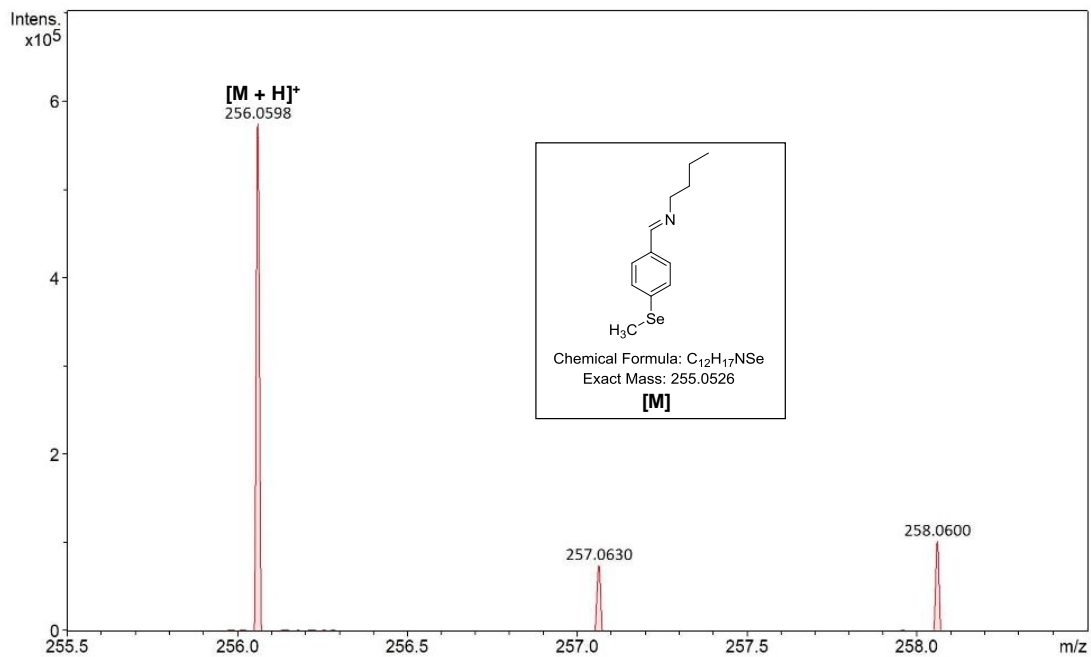

**Figure S48.** ESI-MS spectrum of the reaction of **3**(SeMe) and 1-butylamine in CD<sub>3</sub>CN.

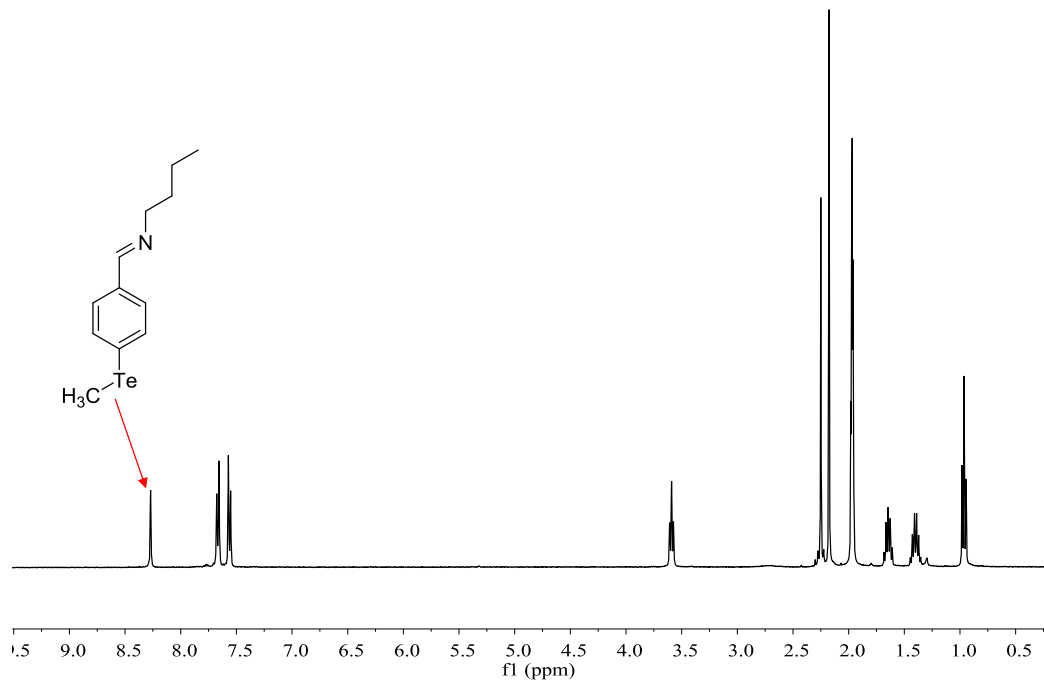

**Figure S49.** <sup>1</sup>H NMR spectrum of the reaction of **3**(TeMe) and 1-butylamine in CD<sub>3</sub>CN.

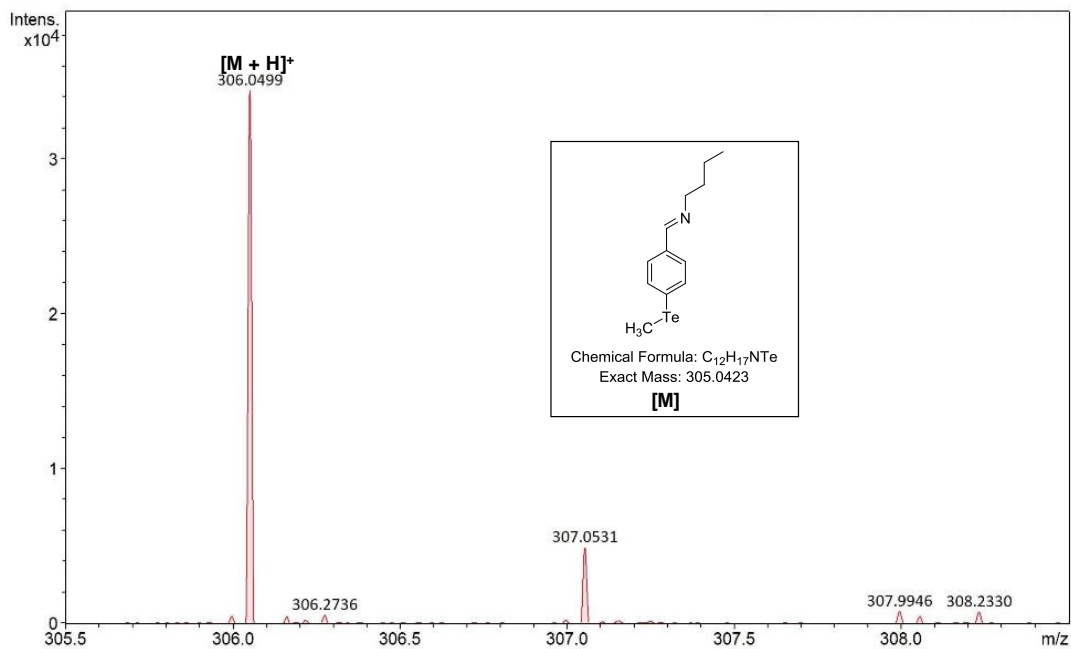

**Figure S50.** ESI-MS spectrum of the reaction of **3**(TeMe) and 1-butylamine in  $CD_3CN$ .

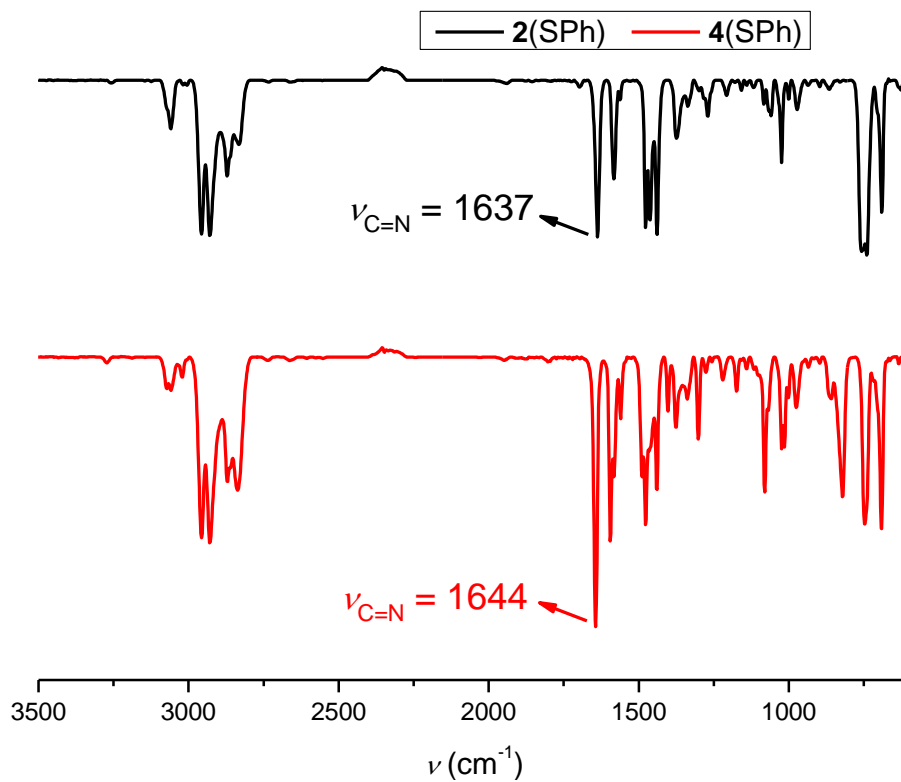

**Figure S51.** IR spectra of **2**(SPh) and **4**(SPh).

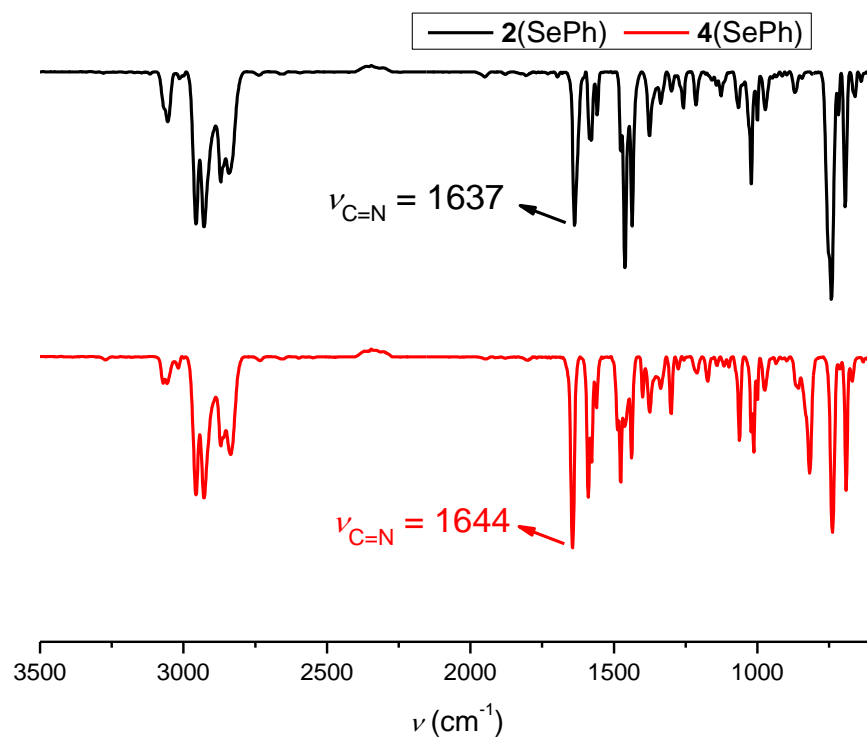

**Figure S52.** IR spectra of 2(SePh) and 4(SePh).

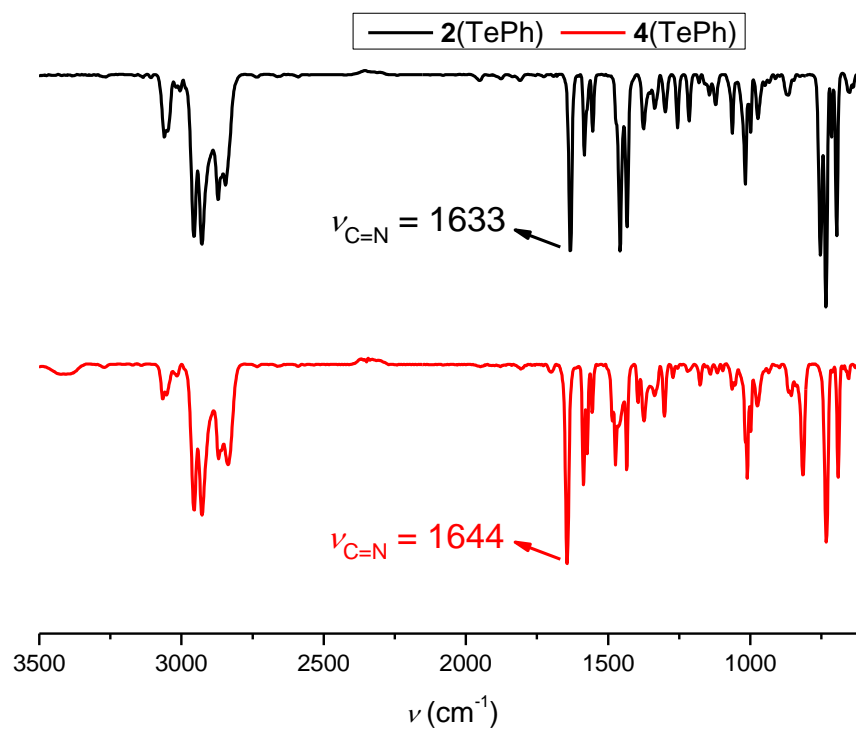

**Figure S53.** IR spectra of 2(TePh) and 4(TePh).

## (2) Imine exchange

**Table S2.** The equilibrium constant and equilibrating time of the different imine exchange reactions in CD<sub>3</sub>CN.

| Panel | Ch | Sequence of adding reagents                            | Solvent            | <i>K</i> | Equilibrating time |
|-------|----|--------------------------------------------------------|--------------------|----------|--------------------|
| a     | S  | 1(ChPh) and 5 simultaneously reacted with 1-butylamine | CD <sub>3</sub> CN | 2.0      | 55 days            |
| b     | Se |                                                        | CD <sub>3</sub> CN | 1.7      | 140 days           |
| c     | Te |                                                        | CD <sub>3</sub> CN | 8.2      | 340 days           |
|       |    |                                                        |                    |          |                    |
| Panel | Ch | Sequence of adding reagents                            | Solvent            | <i>K</i> | Equilibrating time |
| d     | S  | 3(ChPh) and 5 simultaneously reacted with 1-butylamine | CD <sub>3</sub> CN | 0.94     | 1 day              |
| e     | Se |                                                        | CD <sub>3</sub> CN | 0.97     | 1 day              |
| f     | Te |                                                        | CD <sub>3</sub> CN | 1.1      | 1 day              |

| Panel | Sequence of adding reagents                                               | Solvent            | $Q$  | Time     |
|-------|---------------------------------------------------------------------------|--------------------|------|----------|
| g     | <b>1(SPh)</b> and <b>1(TePh)</b> simultaneously reacted with 1-butylamine | CD <sub>3</sub> CN | 0.23 | 375 days |

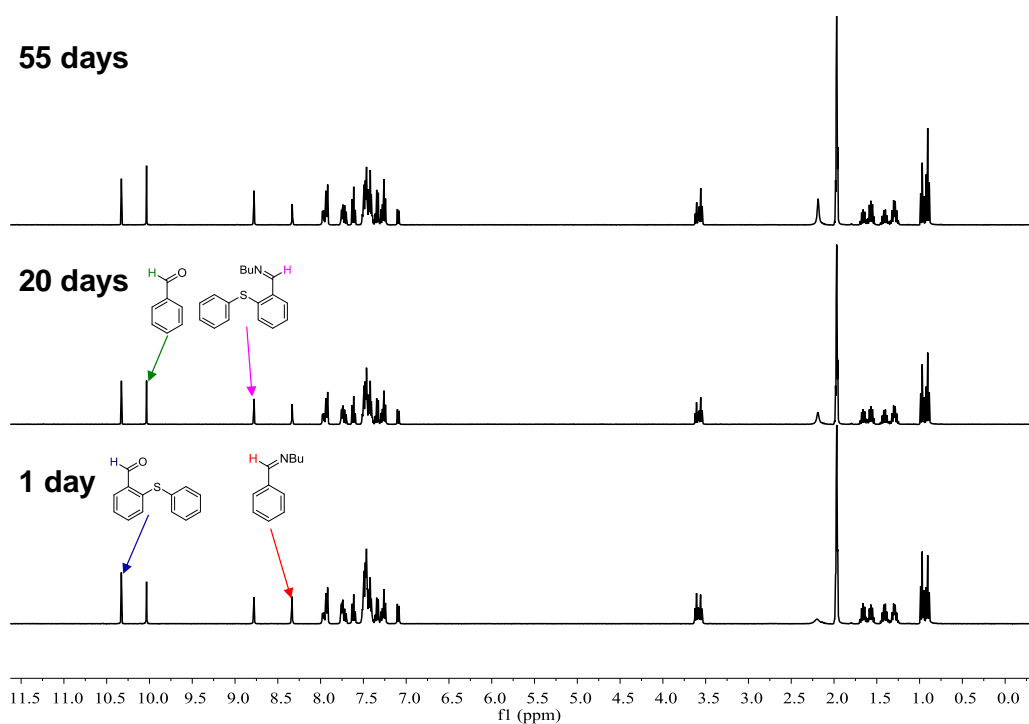

**Figure S54.** <sup>1</sup>H NMR spectra of the competition between **1(SPh)** and **5** for the reaction with 1-butylamine in CD<sub>3</sub>CN at varied time (the corresponding spectra of panel a in Table S2).



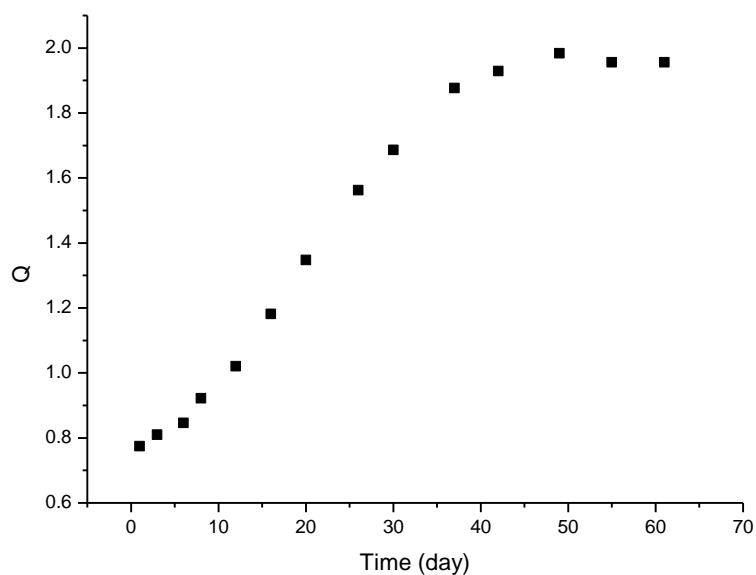

**Figure S55.** Kinetic profile of the competition between **1**(SPh) and **5** for the reaction with 1-butylamine in CD<sub>3</sub>CN.

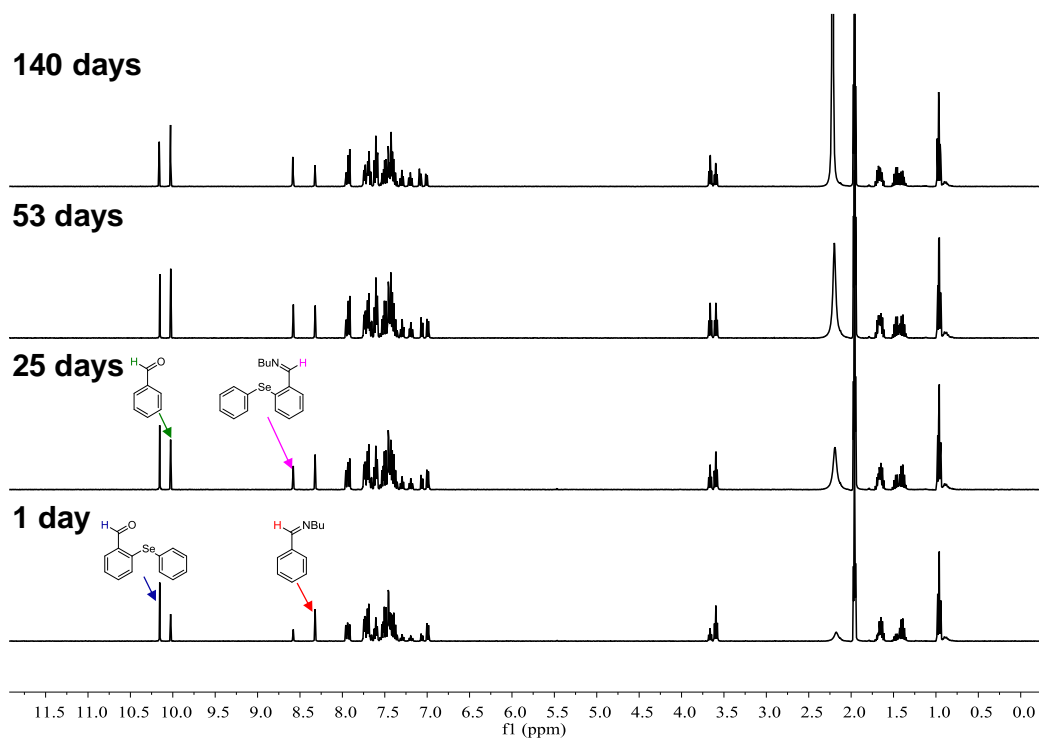

**Figure S56.** <sup>1</sup>H NMR spectra of the competition between **1**(SePh) and **5** for the reaction with 1-butylamine in CD<sub>3</sub>CN at varied time (the corresponding spectra of panel b in Table S2).

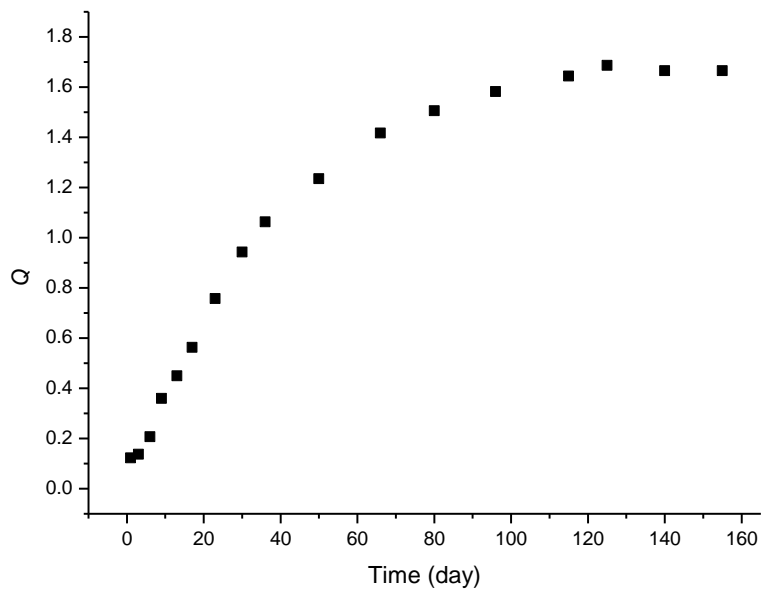

**Figure S57.** Kinetic profile of the competition between **1**(SePh) and **5** for the reaction with 1-butylamine in CD<sub>3</sub>CN.

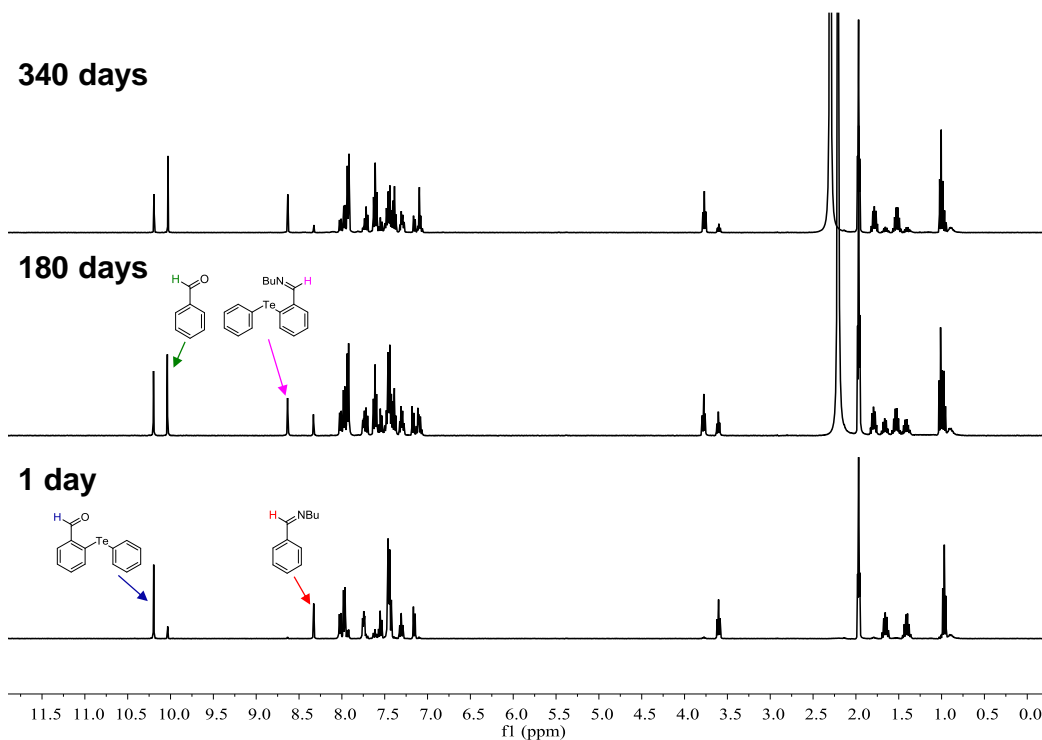

**Figure S58.** <sup>1</sup>H NMR spectra of the competition between **1**(TePh) and **5** for the reaction with 1-butylamine in CD<sub>3</sub>CN at varied time (the corresponding spectra of panel c in Table S2).

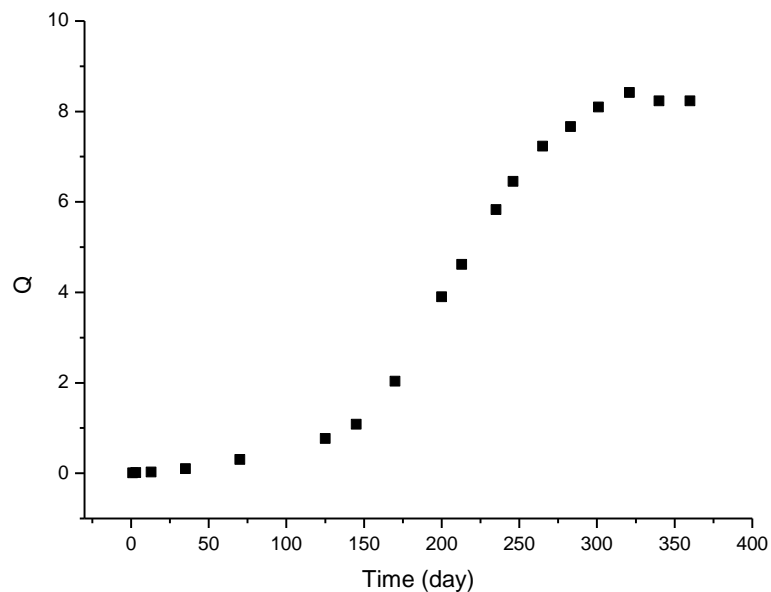

**Figure S59.** Kinetic profile of the competition between **1**(TePh) and **5** for the reaction with 1-butylamine in CD<sub>3</sub>CN.

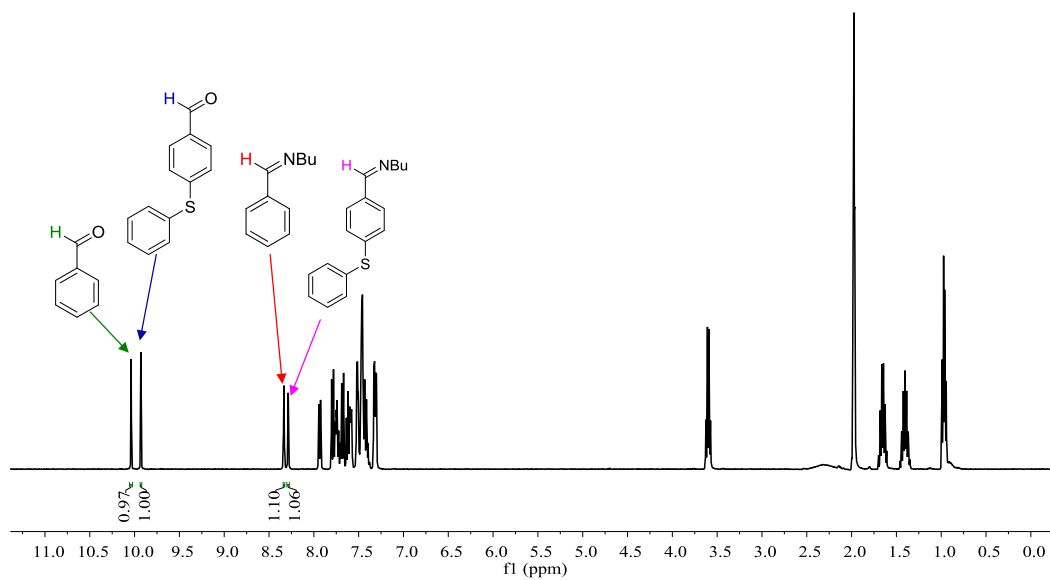

**Figure S60.** <sup>1</sup>H NMR spectrum of the competition between **3**(SPh) and **5** for the reaction with 1-butylamine in CD<sub>3</sub>CN (the corresponding spectra of panel d in Table S2).

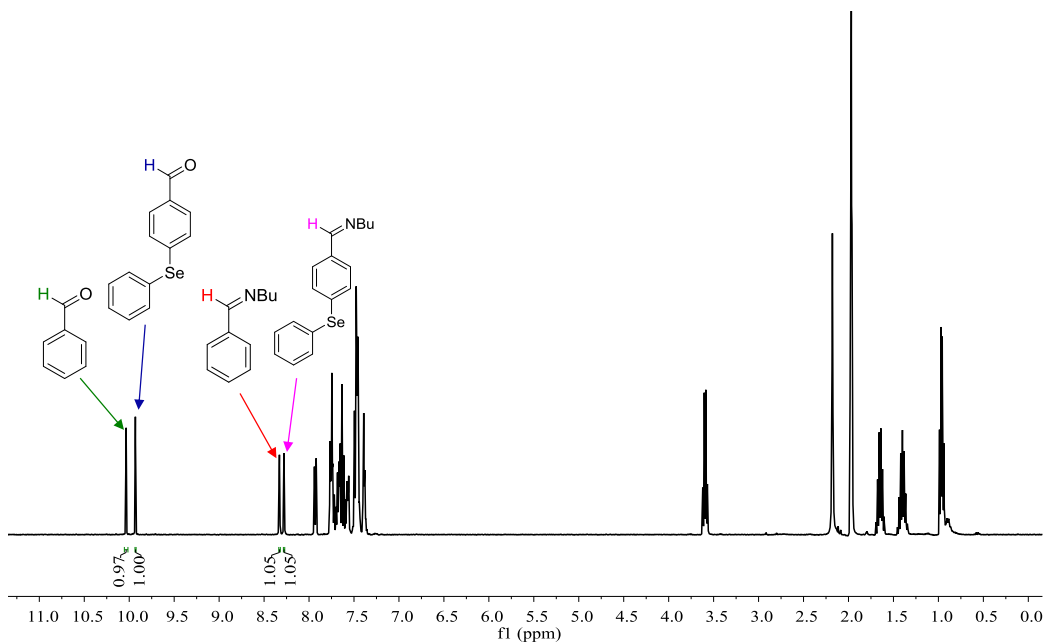

**Figure S61.** <sup>1</sup>H NMR spectrum of the competition between **3**(SePh) and **5** for the reaction with 1-butylamine in CD<sub>3</sub>CN (the corresponding spectra of panel e in Table S2).

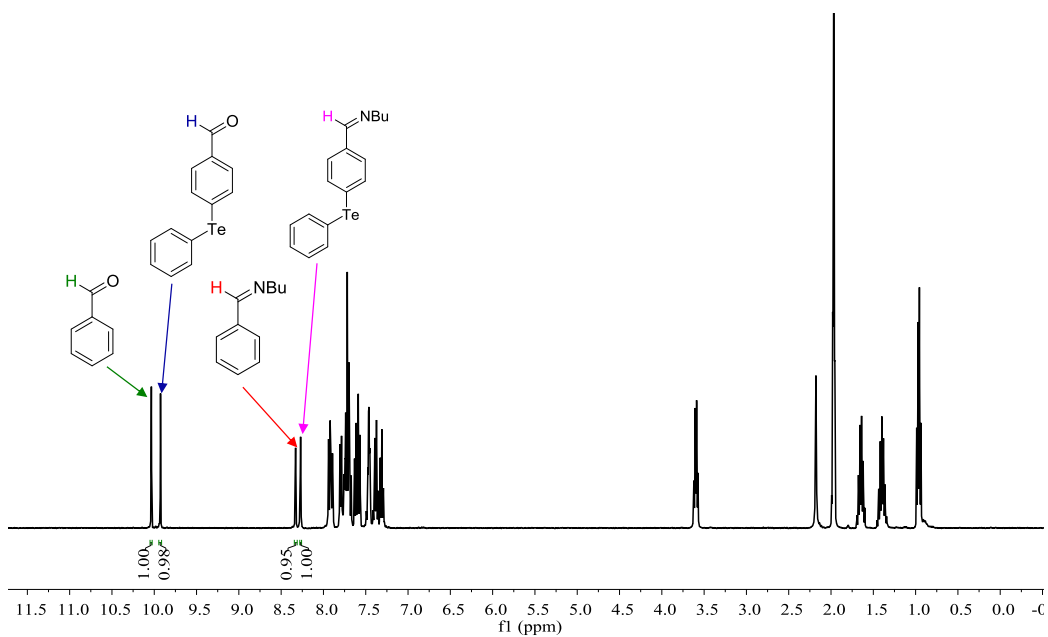

**Figure S62.** <sup>1</sup>H NMR spectrum of the competition between **3**(TePh) and **5** for the reaction with 1-butylamine in CD<sub>3</sub>CN (the corresponding spectra of panel f in Table S2).

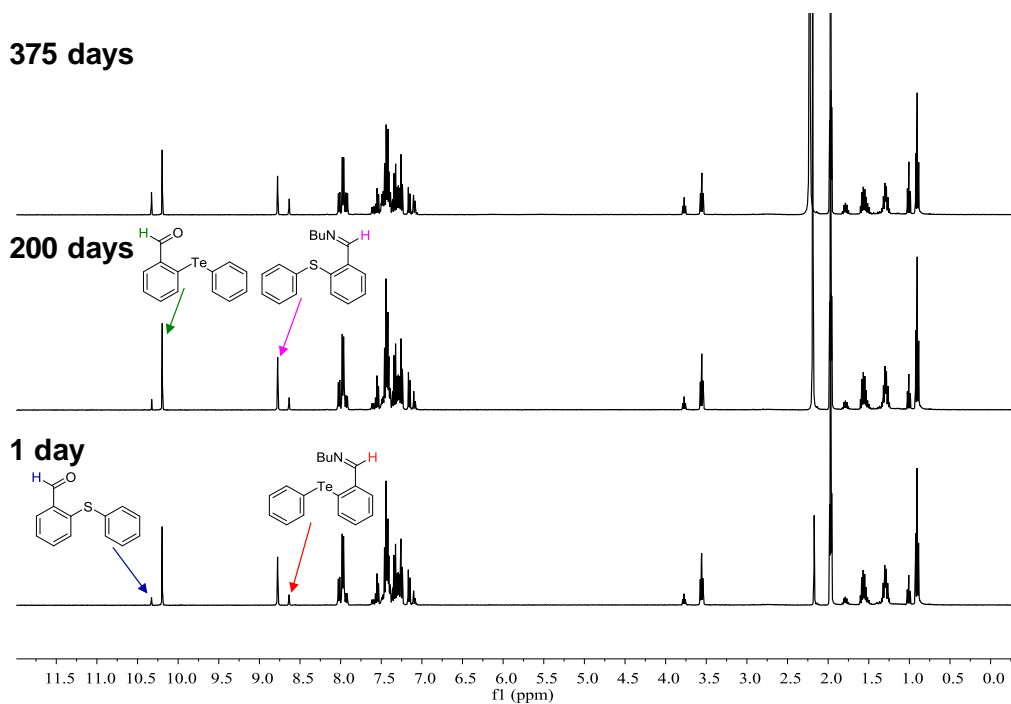

**Figure S63.**  $^1\text{H}$  NMR spectra of the competition between **1(SPh)** and **1(TePh)** for the reaction with 1-butylamine in  $\text{CD}_3\text{CN}$  at varied time (the corresponding spectra of panel g in Table S2).

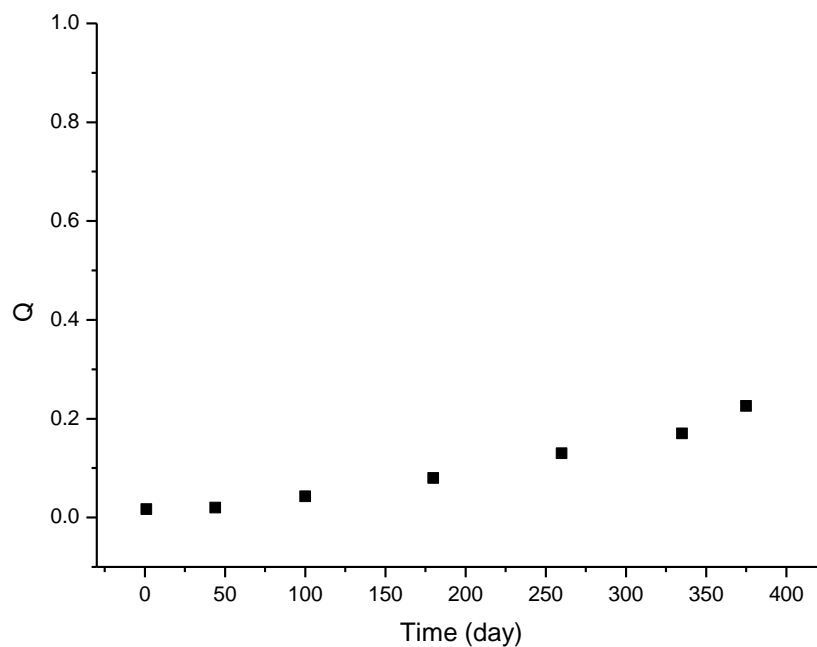

**Figure S64.** Kinetic profile of the competition between **1(SPh)** and **1(TePh)** for the reaction with 1-butylamine in  $\text{CD}_3\text{CN}$ .

**Table S3.** The experimental and calculated  $\Delta G$  of aldehyde exchange, with calculated  $G$  of each component listed. A linear correlation of calculated and experimental  $\Delta G$  is shown ( $R^2 = 0.992$ ), which indicates the accuracy of the M06-2X-D3/def2-TZVP.

| 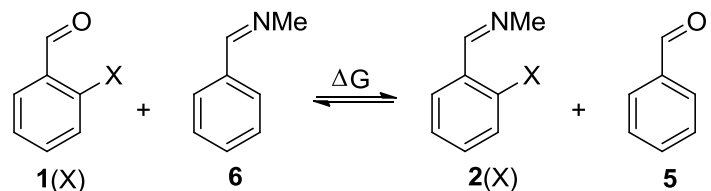 |            |            |            |            |                           |                         |
|------------------------------------------------------------------------------------|------------|------------|------------|------------|---------------------------|-------------------------|
| X                                                                                  | 1(X)       | 6          | 2(X)       | 5          | $\Delta G_{\text{cacld}}$ | $\Delta G_{\text{exp}}$ |
| SPh                                                                                | -974.63585 | -364.86119 | -994.01640 | -345.48113 | -0.31                     | -0.40                   |
| SePh                                                                               | -2978.0259 | -364.86119 | -2997.4063 | -345.48113 | -0.22                     | -0.30                   |
| TePh                                                                               | -844.38940 | -364.86119 | -863.77149 | -345.48113 | -1.27                     | -1.25                   |
| SMe                                                                                | -782.95258 | -364.86119 | -802.33224 | -345.48113 | 0.25                      | 0.02                    |
| SeMe                                                                               | -2786.3443 | -364.86119 | -2805.7237 | -345.48113 | 0.39                      | 0.08                    |
| TeMe                                                                               | -652.70890 | -364.86119 | -672.08982 | -345.48113 | -0.53                     | -0.64                   |

\* *n*-Bu group of imines was replaced with Me group for simplicity of the calculation.

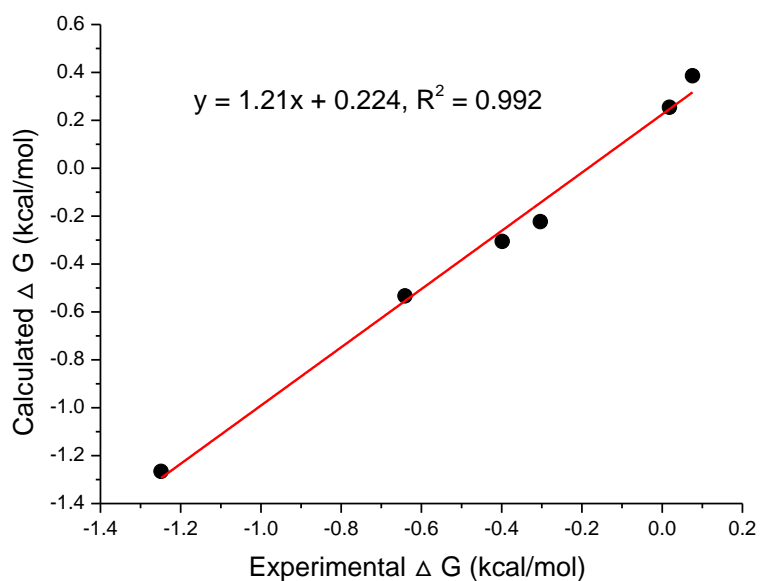

## 4. DFT Calculations

**Table S4.** GKS-EDA results of the conformer 1 of **1/2** (kcal/mol).

| Conf.1  | $\Delta E^{\text{ele}}$ | $\Delta E^{\text{ex-rep}}$ | $\Delta E^{\text{pol}}$ | $\Delta E^{\text{disp}}$ | $\Delta E^{\text{corr}}$ | $\Delta E^{\text{TOT}}$ |
|---------|-------------------------|----------------------------|-------------------------|--------------------------|--------------------------|-------------------------|
| 1(SPh)  | -3.82                   | 9.89                       | -4.05                   | -0.80                    | -1.20                    | 0.01                    |
| 1(SePh) | -5.45                   | 12.56                      | -5.82                   | -0.80                    | -1.24                    | -0.74                   |
| 1(TePh) | -9.41                   | 20.45                      | -12.13                  | -0.70                    | -1.27                    | -3.06                   |
| 1(SMe)  | -3.43                   | 8.03                       | -2.56                   | -0.75                    | -1.33                    | -0.05                   |
| 1(SeMe) | -4.70                   | 10.21                      | -4.01                   | -0.76                    | -1.47                    | -0.73                   |
| 1(TeMe) | -7.58                   | 15.94                      | -8.91                   | -0.68                    | -1.55                    | -2.79                   |
| 2(SPh)  | -4.99                   | 11.14                      | -3.37                   | -1.24                    | -1.22                    | 0.31                    |
| 2(SePh) | -7.80                   | 15.40                      | -5.73                   | -1.37                    | -1.31                    | -0.81                   |
| 2(TePh) | -16.18                  | 31.86                      | -16.43                  | -1.55                    | -1.80                    | -4.09                   |
| 2(SMe)  | -3.97                   | 9.28                       | -2.50                   | -1.16                    | -1.35                    | 0.30                    |
| 2(SeMe) | -6.21                   | 12.53                      | -4.30                   | -1.29                    | -1.49                    | -0.76                   |
| 2(TeMe) | -12.38                  | 23.88                      | -11.74                  | -1.45                    | -1.95                    | -3.64                   |

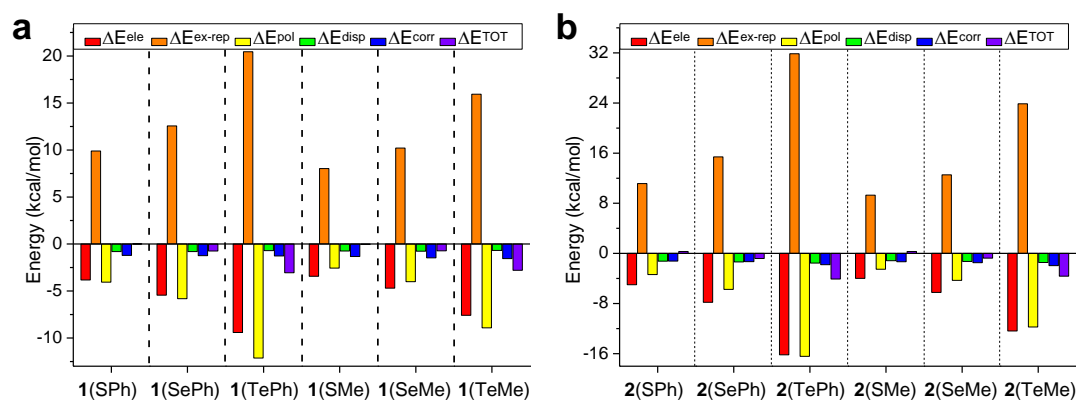

**Table S5.** The difference ( $\Delta\Delta E^{\text{TOT}}_{\text{conf.1-2}}$ , kcal/mol) between interaction energies of conformers 1 and 2 of **1/2** (kcal/mol).

| Conf.1-2 | $\Delta\Delta E^{\text{ele}}$ | $\Delta\Delta E^{\text{ex-rep}}$ | $\Delta\Delta E^{\text{pol}}$ | $\Delta\Delta E^{\text{disp}}$ | $\Delta\Delta E^{\text{corr}}$ | $\Delta\Delta E^{\text{TOT}}$ |
|----------|-------------------------------|----------------------------------|-------------------------------|--------------------------------|--------------------------------|-------------------------------|
| 1(SPh)   | -1.90                         | 3.04                             | -1.85                         | 0.08                           | -1.75                          | -2.37                         |
| 1(SePh)  | -3.55                         | 4.15                             | -2.58                         | 0.03                           | -1.68                          | -3.63                         |
| 1(TePh)  | -7.53                         | 10.86                            | -8.02                         | 0.12                           | -1.72                          | -6.29                         |
| 1(SMe)   | -0.77                         | 2.04                             | -1.84                         | 0.00                           | -1.80                          | -2.37                         |
| 1(SeMe)  | -2.22                         | 3.88                             | -3.26                         | 0.03                           | -1.90                          | -3.47                         |
| 1(TeMe)  | -5.53                         | 8.99                             | -7.51                         | 0.11                           | -1.97                          | -5.91                         |
| 2(SPh)   | -3.07                         | 4.29                             | -1.16                         | -0.36                          | -1.77                          | -2.07                         |
| 2(SePh)  | -5.50                         | 8.46                             | -3.97                         | -0.29                          | -1.91                          | -3.20                         |
| 2(TePh)  | -13.73                        | 22.65                            | -13.23                        | -0.51                          | -2.36                          | -7.18                         |

|                |       |       |        |       |       |       |
|----------------|-------|-------|--------|-------|-------|-------|
| <b>2(SMe)</b>  | -1.13 | 3.44  | -1.96  | -0.28 | -1.85 | -1.78 |
| <b>2(SeMe)</b> | -3.32 | 6.25  | -3.75  | -0.33 | -2.00 | -3.17 |
| <b>2(TeMe)</b> | -9.73 | 16.87 | -10.75 | -0.47 | -2.47 | -6.55 |

**Table S6.** Calculated conformational energy difference  $\Delta G_{\text{conf.1-2}}$  (kcal/mol), the difference ( $\Delta\Delta E_{\text{conf.1-2}}^{\text{TOT}}$ , kcal/mol) between interaction energies of conformers 1 and 2. Structural fragments for GKS-EDA were highlighted in red.

| 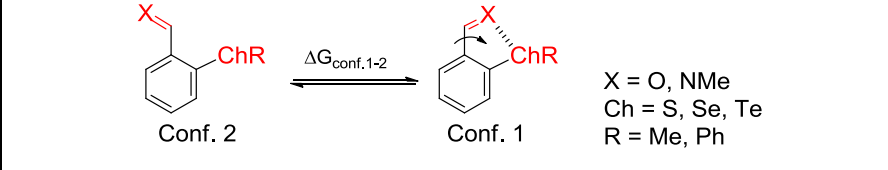 |                               |                                                 |
|------------------------------------------------------------------------------------|-------------------------------|-------------------------------------------------|
|                                                                                    | $\Delta G_{\text{conf. 1-2}}$ | $\Delta\Delta E_{\text{conf.1-2}}^{\text{TOT}}$ |
| <b>1(SPh)</b>                                                                      | 0.07                          | -2.37                                           |
| <b>1(SePh)</b>                                                                     | -1.55                         | -3.63                                           |
| <b>1(TePh)</b>                                                                     | -3.65                         | -6.29                                           |
| <b>1(SMe)</b>                                                                      | -0.66                         | -2.37                                           |
| <b>1(SeMe)</b>                                                                     | -1.20                         | -3.47                                           |
| <b>1(TeMe)</b>                                                                     | -3.44                         | -5.91                                           |
| <b>2(SPh)</b>                                                                      | 0.33                          | -2.07                                           |
| <b>2(SePh)</b>                                                                     | -1.17                         | -3.20                                           |
| <b>2(TePh)</b>                                                                     | -4.38                         | -7.18                                           |
| <b>2(SMe)</b>                                                                      | 0.72                          | -1.78                                           |
| <b>2(SeMe)</b>                                                                     | -0.80                         | -3.17                                           |
| <b>2(TeMe)</b>                                                                     | -3.68                         | -6.55                                           |

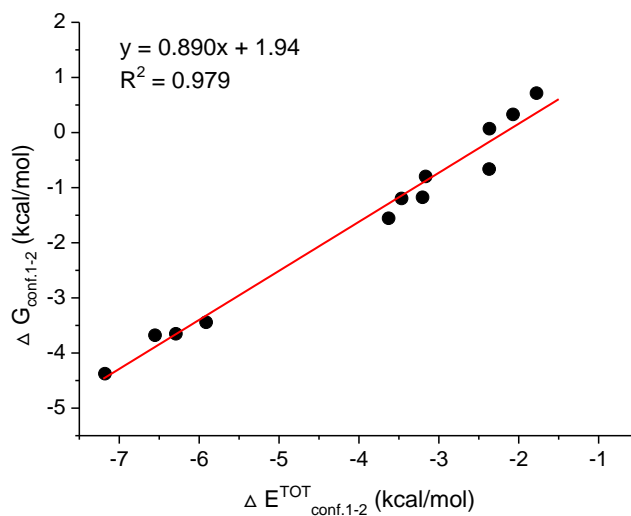



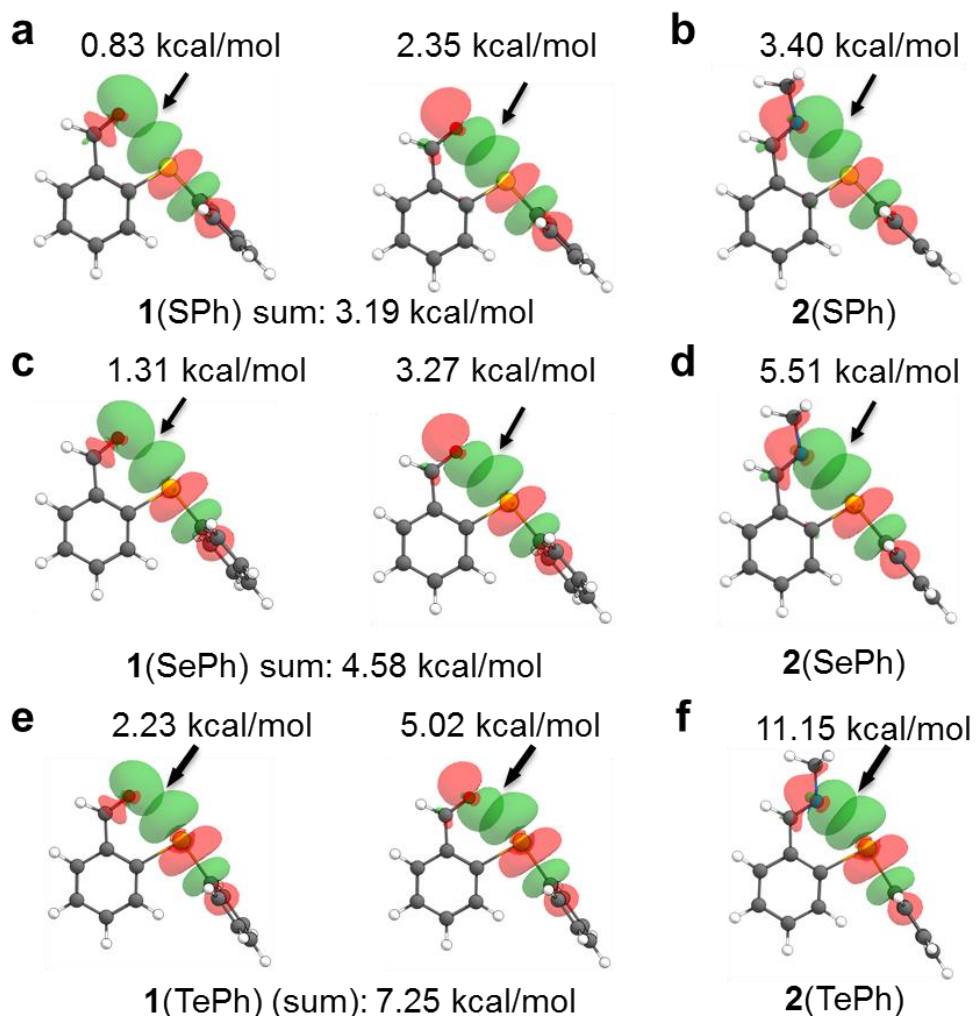

**Figure S65.** NBO orbitals and stabilization energies of  $n \rightarrow \sigma^*$  interactions in **1(SPh)** (a), **2(SPh)** (b), **1(SePh)** (c), **2(SePh)** (d), **1(TePh)** (e), and **2(TePh)** (f), respectively.

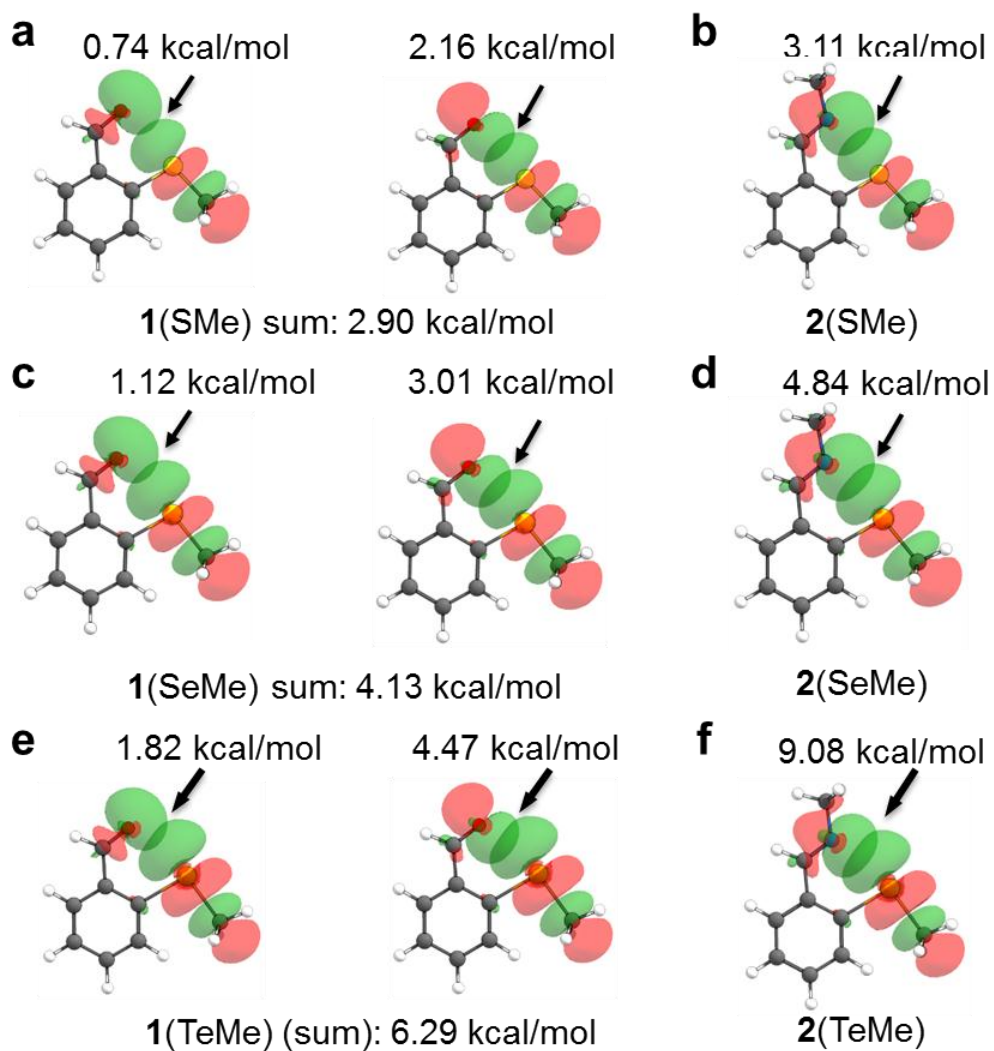

**Figure S66.** NBO orbitals and stabilization energies of  $n \rightarrow \sigma^*$  interactions in **1(SMe)** (a), **2(SMe)** (b), **1(SeMe)** (c), **2(SeMe)** (d), **1(TeMe)** (e), and **2(TeMe)** (f), respectively.

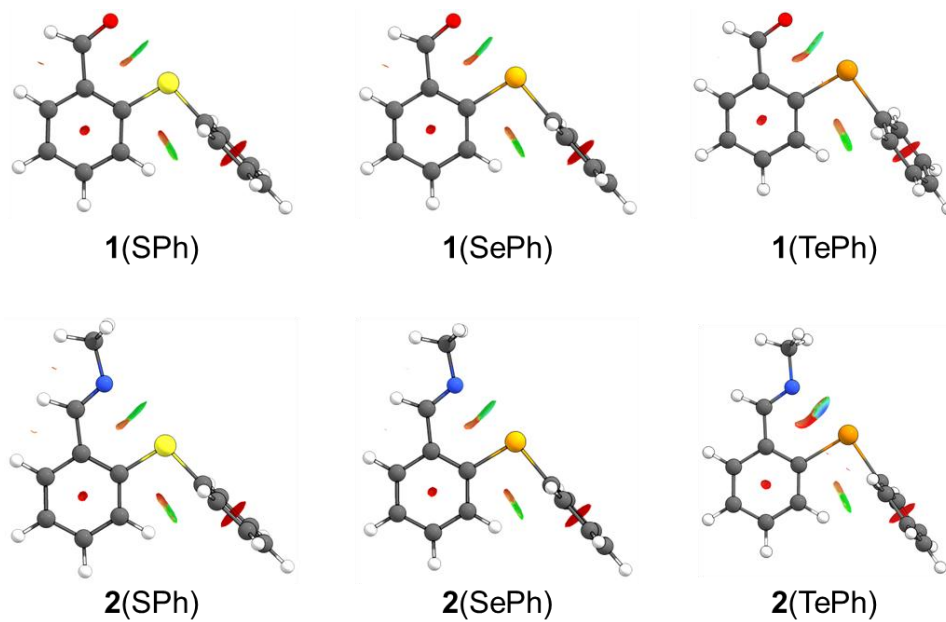

**Figure S67.** NCI plots of conformer 1 for **1(ChPh)** and **2(ChPh)**.

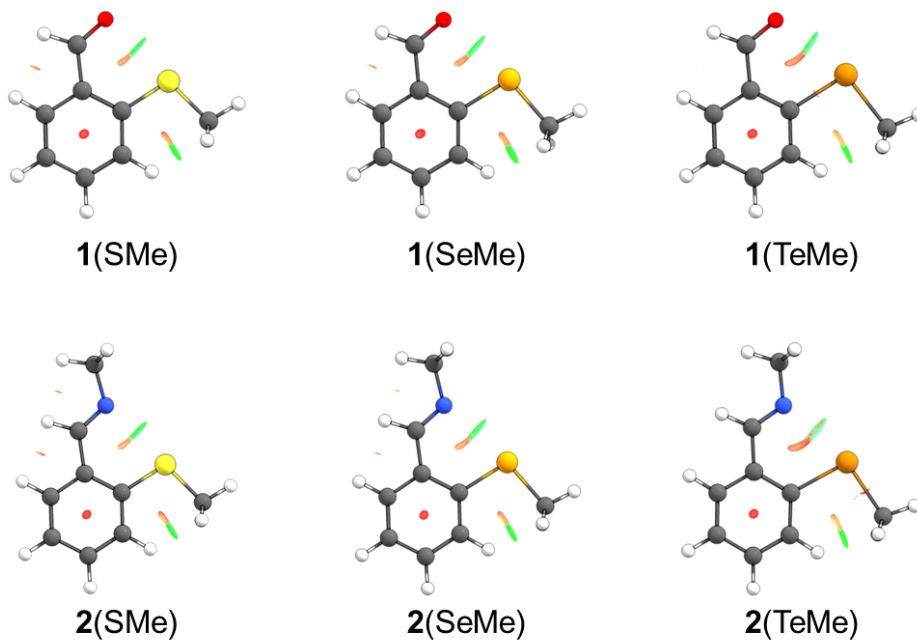

**Figure S68.** NCI plots of conformer 1 for **1(ChMe)** and **2(ChMe)**.

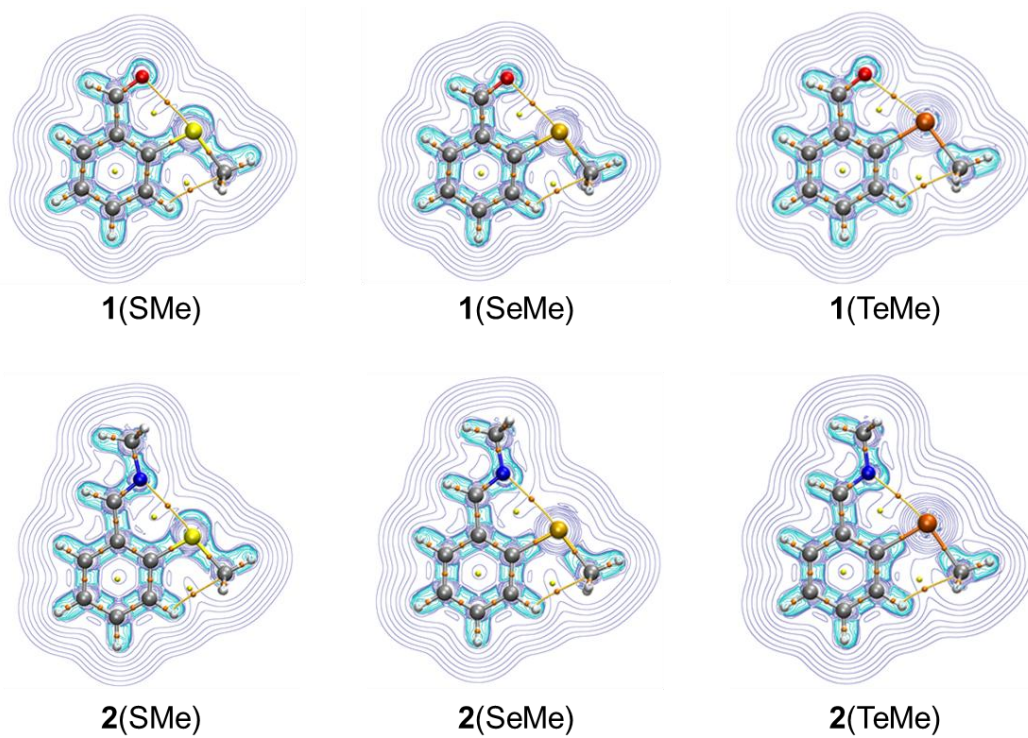

**Figure S69.** Contour line diagram of the Laplacian distribution  $\nabla^2\rho(\mathbf{r})$  and bond paths of conformer 1 for **1(ChMe)** and **2(ChMe)**.

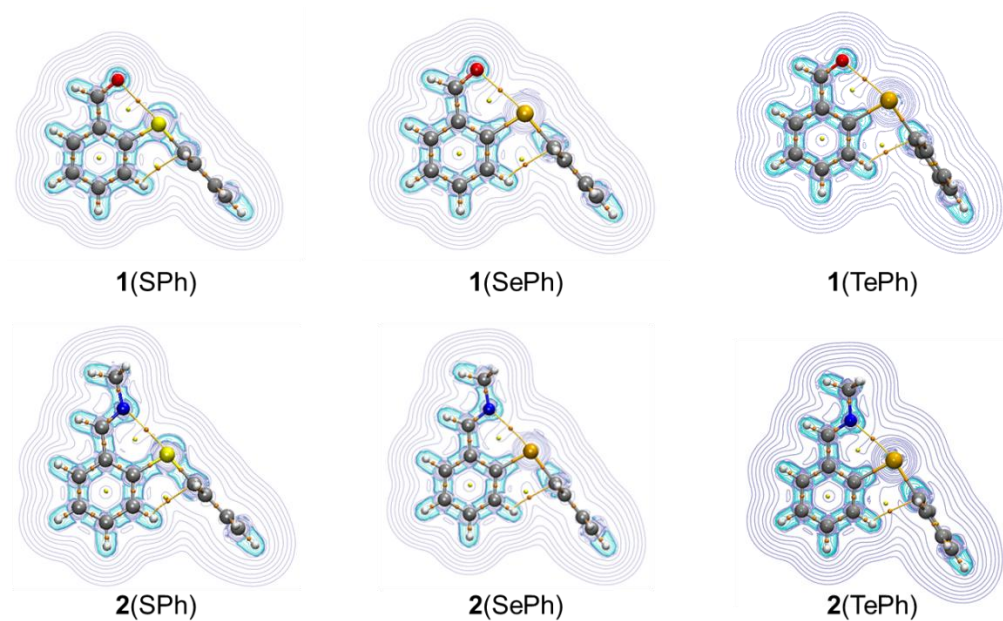

**Figure S70.** Contour line diagram of the Laplacian distribution  $\nabla^2\rho(\mathbf{r})$  and bond paths of conformer 1 for **1(ChPh)** and **2(ChPh)**.

**Table S7.** The calculated parameters of BCP for chalcogen bonding (Ch · O/Ch · N), including density of all electrons  $\rho(\mathbf{r})$  (in au), Laplacian of electron density  $\nabla^2\rho(\mathbf{r})$  (in au), total energy density  $H(\mathbf{r})$  (in hartree), potential energy density  $V(\mathbf{r})$  (in hartree), Lagrangian kinetic energy  $G(\mathbf{r})$  (in hartree), Wiberg bond index ( $W$ ), and the eigenvalues of hessian for the conformer 1 of **1**(ChPh), **2**(ChPh), **1**(ChMe), and **2**(ChMe).

|                 | $\rho(\mathbf{r})$ | $\nabla^2\rho(\mathbf{r})$ | $H(\mathbf{r})$ | $V(\mathbf{r})$ | $G(\mathbf{r})$ | $W$   | $\lambda_1, \lambda_2, \lambda_3$ |
|-----------------|--------------------|----------------------------|-----------------|-----------------|-----------------|-------|-----------------------------------|
| <b>1</b> (SPh)  | 0.018              | 0.070                      | 0.0017          | -0.0141         | 0.0158          | 0.028 | -0.014, -0.013, +0.098            |
| <b>2</b> (SPh)  | 0.018              | 0.061                      | 0.0012          | -0.0130         | 0.0141          | 0.035 | -0.014, -0.012, +0.087            |
| <b>1</b> (SePh) | 0.020              | 0.071                      | 0.0015          | -0.0148         | 0.0163          | 0.036 | -0.015, -0.014, +0.100            |
| <b>2</b> (SePh) | 0.021              | 0.064                      | 0.0007          | -0.0145         | 0.0152          | 0.049 | -0.016, -0.013, +0.093            |
| <b>1</b> (TePh) | 0.023              | 0.073                      | 0.0004          | -0.0175         | 0.0180          | 0.058 | -0.017, -0.015, +0.105            |
| <b>2</b> (TePh) | 0.029              | 0.070                      | -0.0018         | -0.0211         | 0.0193          | 0.102 | -0.023, -0.018, +0.111            |
| <b>1</b> (SMe)  | 0.0177             | 0.0690                     | 0.0018          | -0.0137         | 0.0155          | 0.027 | -0.014, -0.013, +0.096            |
| <b>2</b> (SMe)  | 0.0177             | 0.0600                     | 0.0012          | -0.0126         | 0.0138          | 0.035 | -0.014, -0.011, +0.085            |
| <b>1</b> (SeMe) | 0.0189             | 0.0693                     | 0.0015          | -0.0143         | 0.0158          | 0.034 | -0.014, -0.013, +0.097            |
| <b>2</b> (SeMe) | 0.0196             | 0.0613                     | 0.0008          | -0.0136         | 0.0145          | 0.046 | -0.015, -0.012, +0.088            |
| <b>1</b> (TeMe) | 0.0215             | 0.0705                     | 0.0006          | -0.0164         | 0.0170          | 0.053 | -0.016, -0.014, +0.100            |
| <b>2</b> (TeMe) | 0.0257             | 0.0661                     | -0.0010         | -0.0185         | 0.0175          | 0.085 | -0.019, -0.016, +0.101            |

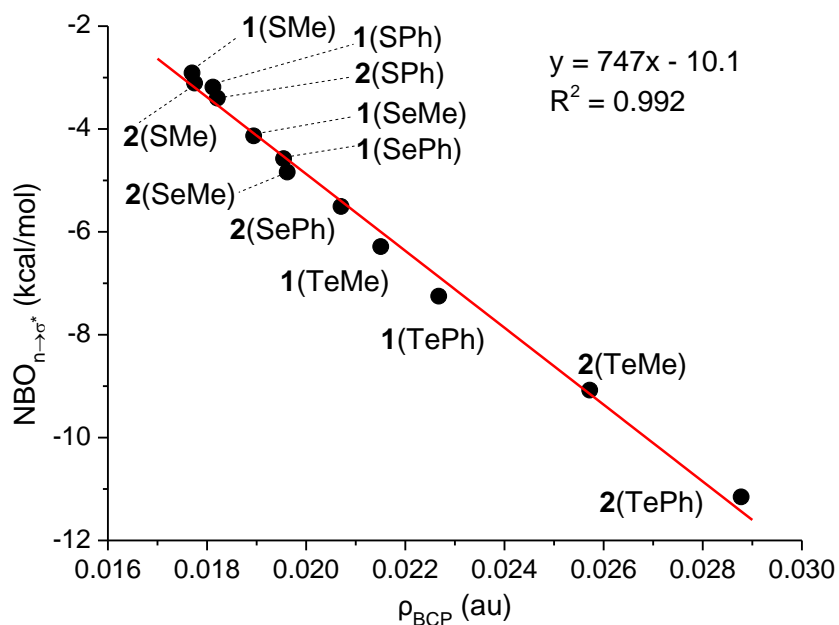

**Table S8.** Calculated bond length (D), Wiberg bond index (W), and their difference between closed and open conformers for **1(ChPh)** and **2(ChPh)**.

| 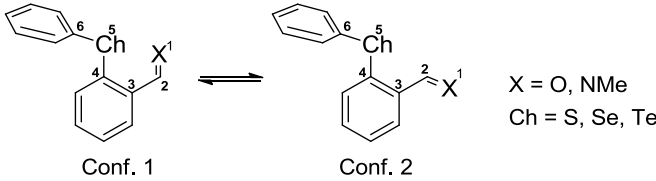 |       |       |                        |       |       |                |            |
|------------------------------------------------------------------------------------|-------|-------|------------------------|-------|-------|----------------|------------|
| <b>1(SPh)-Conf. 1</b>                                                              | D (Å) | W     | <b>1(SPh)-Conf. 2</b>  | D (Å) | W     | $\Delta D$ (Å) | $\Delta W$ |
| O1-C2                                                                              | 1.210 | 1.781 | O1-C2                  | 1.209 | 1.806 | 0.001          | -0.025     |
| C2-C3                                                                              | 1.469 | 1.064 | C2-C3                  | 1.480 | 1.039 | -0.011         | 0.025      |
| C3-C4                                                                              | 1.410 | 1.310 | C3-C4                  | 1.403 | 1.350 | 0.007          | -0.039     |
| C4-S5                                                                              | 1.770 | 1.085 | C4-S5                  | 1.776 | 1.058 | -0.006         | 0.027      |
| S5-C6                                                                              | 1.777 | 1.010 | S5-C6                  | 1.774 | 1.025 | 0.003          | -0.015     |
| <b>1(SePh)-Conf. 1</b>                                                             | D (Å) | W     | <b>1(SePh)-Conf. 2</b> | D (Å) | W     | $\Delta D$ (Å) | $\Delta W$ |
| O1-C2                                                                              | 1.210 | 1.774 | O1-C2                  | 1.208 | 1.809 | 0.003          | -0.035     |
| C2-C3                                                                              | 1.468 | 1.063 | C2-C3                  | 1.478 | 1.039 | -0.011         | 0.024      |
| C3-C4                                                                              | 1.406 | 1.325 | C3-C4                  | 1.403 | 1.352 | 0.004          | -0.028     |
| C4-Se5                                                                             | 1.922 | 1.046 | C4-Se5                 | 1.931 | 1.025 | -0.009         | 0.021      |
| Se5-C6                                                                             | 1.925 | 0.977 | Se5-C6                 | 1.919 | 0.994 | 0.007          | -0.017     |
| <b>1(TePh)-Conf. 1</b>                                                             | D (Å) | W     | <b>1(TePh)-Conf. 2</b> | D (Å) | W     | $\Delta D$ (Å) | $\Delta W$ |
| O1-C2                                                                              | 1.213 | 1.751 | O1-C2                  | 1.207 | 1.811 | 0.007          | -0.060     |
| C2-C3                                                                              | 1.464 | 1.070 | C2-C3                  | 1.478 | 1.038 | -0.014         | 0.031      |
| C3-C4                                                                              | 1.404 | 1.335 | C3-C4                  | 1.402 | 1.364 | 0.003          | -0.030     |
| C4-Te5                                                                             | 2.118 | 0.980 | C4-Te5                 | 2.133 | 0.962 | -0.015         | 0.017      |
| Te5-C6                                                                             | 2.125 | 0.904 | Te5-C6                 | 2.111 | 0.944 | 0.014          | -0.040     |
| <b>2(SPh)-Conf. 1</b>                                                              | D (Å) | W     | <b>1(SPh)-Conf. 2</b>  | D (Å) | W     | $\Delta D$ (Å) | $\Delta W$ |
| N1-C2                                                                              | 1.263 | 1.852 | N1-C2                  | 1.263 | 1.875 | 0.000          | -0.023     |
| C2-C3                                                                              | 1.470 | 1.072 | C2-C3                  | 1.478 | 1.049 | -0.008         | 0.022      |
| C3-C4                                                                              | 1.411 | 1.321 | C3-C4                  | 1.400 | 1.370 | 0.011          | -0.049     |
| C4-S5                                                                              | 1.777 | 1.072 | C4-S5                  | 1.778 | 1.043 | -0.001         | 0.029      |
| S5-C6                                                                              | 1.779 | 1.006 | S5-C6                  | 1.774 | 1.034 | 0.005          | -0.028     |
| <b>2(SePh)-Conf. 1</b>                                                             | D (Å) | W     | <b>2(SePh)-Conf. 2</b> | D (Å) | W     | $\Delta D$ (Å) | $\Delta W$ |
| N1-C2                                                                              | 1.263 | 1.848 | N1-C2                  | 1.263 | 1.877 | 0.000          | -0.029     |
| C2-C3                                                                              | 1.468 | 1.070 | C2-C3                  | 1.477 | 1.049 | -0.009         | 0.021      |
| C3-C4                                                                              | 1.408 | 1.334 | C3-C4                  | 1.401 | 1.371 | 0.007          | -0.037     |
| C4-Se5                                                                             | 1.929 | 1.034 | C4-Se5                 | 1.930 | 1.016 | -0.002         | 0.018      |
| Se5-C6                                                                             | 1.930 | 0.965 | Se5-C6                 | 1.920 | 0.999 | 0.010          | -0.035     |

| <b>2(TePh)-Conf. 1</b> | D (Å) | W     | <b>2(TePh)-Conf. 2</b> | D (Å) | W     | $\Delta D$ (Å) | $\Delta W$ |
|------------------------|-------|-------|------------------------|-------|-------|----------------|------------|
| N1-C2                  | 1.264 | 1.827 | N1-C2                  | 1.262 | 1.879 | 0.002          | -0.052     |
| C2-C3                  | 1.465 | 1.073 | C2-C3                  | 1.477 | 1.049 | -0.013         | 0.025      |
| C3-C4                  | 1.405 | 1.343 | C3-C4                  | 1.401 | 1.376 | 0.004          | -0.033     |
| C4-Te5                 | 2.123 | 0.969 | C4-Te5                 | 2.132 | 0.960 | -0.009         | 0.009      |
| Te5-C6                 | 2.139 | 0.869 | Te5-C6                 | 2.112 | 0.944 | 0.027          | -0.075     |

**Table S9.** Calculated bond length (D), Wiberg bond index (W), and the difference between closed and open conformers for **1(ChMe)** and **2(ChMe)**.

| 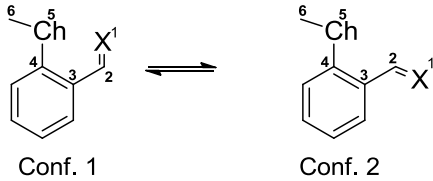 |       |       |                        |       |       |                |            |
|-----------------------------------------------------------------------------------|-------|-------|------------------------|-------|-------|----------------|------------|
| <b>1(SMe)-Conf. 1</b>                                                             | D (Å) | W     | <b>1(SMe)-Conf. 2</b>  | D (Å) | W     | $\Delta D$ (Å) | $\Delta W$ |
| O1-C2                                                                             | 1.210 | 1.780 | O1-C2                  | 1.209 | 1.804 | 0.001          | -0.024     |
| C2-C3                                                                             | 1.469 | 1.067 | C2-C3                  | 1.478 | 1.044 | -0.009         | 0.023      |
| C3-C4                                                                             | 1.413 | 1.303 | C3-C4                  | 1.409 | 1.330 | 0.004          | -0.027     |
| C4-S5                                                                             | 1.757 | 1.113 | C4-S5                  | 1.764 | 1.090 | -0.007         | 0.023      |
| S5-C6                                                                             | 1.800 | 1.018 | S5-C6                  | 1.797 | 1.026 | 0.003          | -0.008     |
| <b>1(SeMe)-Conf. 1</b>                                                            | D (Å) | W     | <b>1(SeMe)-Conf. 2</b> | D (Å) | W     | $\Delta D$ (Å) | $\Delta W$ |
| O1-C2                                                                             | 1.210 | 1.775 | O1-C2                  | 1.208 | 1.808 | 0.002          | -0.033     |
| C2-C3                                                                             | 1.468 | 1.065 | C2-C3                  | 1.478 | 1.040 | -0.010         | 0.025      |
| C3-C4                                                                             | 1.408 | 1.319 | C3-C4                  | 1.405 | 1.346 | 0.004          | -0.027     |
| C4-Se5                                                                            | 1.911 | 1.067 | C4-Se5                 | 1.920 | 1.046 | -0.009         | 0.021      |
| Se5-C6                                                                            | 1.946 | 0.996 | Se5-C6                 | 1.942 | 1.011 | 0.005          | -0.014     |
| <b>1(TeMe)-Conf. 1</b>                                                            | D (Å) | W     | <b>1(TeMe)-Conf. 2</b> | D (Å) | W     | $\Delta D$ (Å) | $\Delta W$ |
| O1-C2                                                                             | 1.213 | 1.755 | O1-C2                  | 1.207 | 1.810 | 0.006          | -0.055     |
| C2-C3                                                                             | 1.465 | 1.070 | C2-C3                  | 1.478 | 1.040 | -0.013         | 0.030      |
| C3-C4                                                                             | 1.405 | 1.331 | C3-C4                  | 1.403 | 1.360 | 0.003          | -0.029     |
| C4-Te5                                                                            | 2.110 | 0.995 | C4-Te5                 | 2.125 | 0.977 | -0.015         | 0.018      |
| Te5-C6                                                                            | 2.140 | 0.947 | Te5-C6                 | 2.130 | 0.982 | 0.010          | -0.034     |
| <b>2(SMe)-Conf. 1</b>                                                             | D (Å) | W     | <b>1(SMe)-Conf. 2</b>  | D (Å) | W     | $\Delta D$ (Å) | $\Delta W$ |
| N1-C2                                                                             | 1.263 | 1.853 | N1-C2                  | 1.263 | 1.876 | 0.000          | -0.023     |
| C2-C3                                                                             | 1.469 | 1.073 | C2-C3                  | 1.477 | 1.051 | -0.008         | 0.022      |
| C3-C4                                                                             | 1.414 | 1.313 | C3-C4                  | 1.408 | 1.341 | 0.006          | -0.028     |

|                        |       |       |                        |       |       |                |            |
|------------------------|-------|-------|------------------------|-------|-------|----------------|------------|
| C4-S5                  | 1.764 | 1.099 | C4-S5                  | 1.768 | 1.076 | -0.004         | 0.022      |
| S5-C6                  | 1.801 | 1.014 | S5-C6                  | 1.797 | 1.027 | 0.004          | -0.013     |
| <b>2(SeMe)-Conf. 1</b> | D (Å) | W     | <b>2(SeMe)-Conf. 2</b> | D (Å) | W     | $\Delta D$ (Å) | $\Delta W$ |
| N1-C2                  | 1.263 | 1.849 | N1-C2                  | 1.263 | 1.878 | 0.000          | -0.029     |
| C2-C3                  | 1.469 | 1.071 | C2-C3                  | 1.477 | 1.049 | -0.009         | 0.022      |
| C3-C4                  | 1.409 | 1.328 | C3-C4                  | 1.404 | 1.357 | 0.005          | -0.029     |
| C4-Se5                 | 1.918 | 1.055 | C4-Se5                 | 1.922 | 1.037 | -0.004         | 0.018      |
| Se5-C6                 | 1.950 | 0.987 | Se5-C6                 | 1.942 | 1.011 | 0.008          | -0.025     |
| <b>2(TeMe)-Conf. 1</b> | D (Å) | W     | <b>2(TeMe)-Conf. 2</b> | D (Å) | W     | $\Delta D$ (Å) | $\Delta W$ |
| N1-C2                  | 1.263 | 1.833 | N1-C2                  | 1.262 | 1.879 | 0.002          | -0.046     |
| C2-C3                  | 1.465 | 1.073 | C2-C3                  | 1.477 | 1.049 | -0.012         | 0.024      |
| C3-C4                  | 1.406 | 1.339 | C3-C4                  | 1.402 | 1.371 | 0.004          | -0.032     |
| C4-Te5                 | 2.115 | 0.982 | C4-Te5                 | 2.124 | 0.974 | -0.009         | 0.008      |
| Te5-C6                 | 2.151 | 0.919 | Te5-C6                 | 2.131 | 0.981 | 0.020          | -0.063     |

**Table S10.** NPA charge (in e) of the atoms involved with chalcogen bond in conformer 1 or conformer 2 for **1(ChPh)** and **2(ChPh)**.

|                                                                                               |        |       |                        |        |       |
|-----------------------------------------------------------------------------------------------|--------|-------|------------------------|--------|-------|
| <p style="text-align: center;"> <math>X = O, NMe</math><br/> <math>Ch = S, Se, Te</math> </p> |        |       |                        |        |       |
| NPA Charge                                                                                    | O      | Ch    | NPA Charge             | N      | Ch    |
| <b>1(SPh)-Conf. 1</b>                                                                         | -0.562 | 0.341 | <b>2(SPh)-Conf. 1</b>  | -0.421 | 0.332 |
| <b>1(SPh)-Conf. 2</b>                                                                         | -0.560 | 0.293 | <b>2(SPh)-Conf. 2</b>  | -0.416 | 0.287 |
| <b>1(SePh)-Conf. 1</b>                                                                        | -0.565 | 0.425 | <b>2(SePh)-Conf. 1</b> | -0.426 | 0.417 |
| <b>1(SePh)-Conf. 2</b>                                                                        | -0.556 | 0.361 | <b>2(SePh)-Conf. 2</b> | -0.413 | 0.355 |
| <b>1(TePh)-Conf. 1</b>                                                                        | -0.577 | 0.624 | <b>2(TePh)-Conf. 1</b> | -0.442 | 0.618 |
| <b>1(TePh)-Conf. 2</b>                                                                        | -0.554 | 0.537 | <b>2(TePh)-Conf. 2</b> | -0.410 | 0.527 |



**Table S11.** NPA charge (in e) of the atoms involved with chalcogen bond in conformer 1 or conformer 2 for **1**(ChMe) and **2**(ChMe).

| 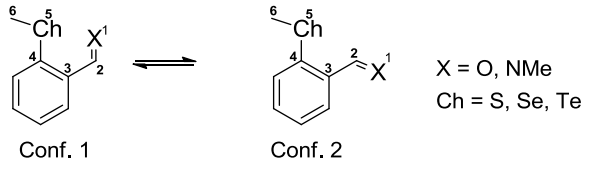 |        |       |                         |        |       |
|------------------------------------------------------------------------------------|--------|-------|-------------------------|--------|-------|
| NPA Charge                                                                         | O      | Ch    | NPA Charge              | N      | Ch    |
| <b>1</b> (SMe)-Conf. 1                                                             | -0.562 | 0.326 | <b>2</b> (SMe)-Conf. 1  | -0.424 | 0.316 |
| <b>1</b> (SMe)-Conf. 2                                                             | -0.560 | 0.270 | <b>2</b> (SMe)-Conf. 2  | -0.416 | 0.258 |
| <b>1</b> (SeMe)-Conf. 1                                                            | -0.565 | 0.400 | <b>2</b> (SeMe)-Conf. 1 | -0.427 | 0.391 |
| <b>1</b> (SeMe)-Conf. 2                                                            | -0.556 | 0.331 | <b>2</b> (SeMe)-Conf. 2 | -0.411 | 0.319 |
| <b>1</b> (TeMe)-Conf. 1                                                            | -0.576 | 0.584 | <b>2</b> (TeMe)-Conf. 1 | -0.440 | 0.580 |
| <b>1</b> (TeMe)-Conf. 2                                                            | -0.553 | 0.494 | <b>2</b> (TeMe)-Conf. 2 | -0.409 | 0.481 |

## 5. Control over Thermodynamic and Kinetic Selectivity

**Table S12.** The equilibrium constant and equilibrating time of the different imine exchange reactions in CD<sub>3</sub>CN.

| Panel | Ch | Sequence of adding reagents                                 | Solvent            | <i>K</i> | Equilibrating time |
|-------|----|-------------------------------------------------------------|--------------------|----------|--------------------|
| a     | S  | 1(ChPh) and 5 simultaneously reacted with 1-butylamine      | CD <sub>3</sub> CN | 2.0      | 2 days             |
| b     | Se |                                                             | CD <sub>3</sub> CN | 1.7      | 8 days             |
| c     | Te |                                                             | CD <sub>3</sub> CN | 8.2      | 44 days            |
|       |    |                                                             |                    |          |                    |
| Panel |    | Sequence of adding reagents                                 | Solvent            | <i>K</i> | Equilibrating time |
| d     |    | 1(SPh) and 1(TePh) simultaneously reacted with 1-butylamine | CD <sub>3</sub> CN | 4.2      | 31 days            |

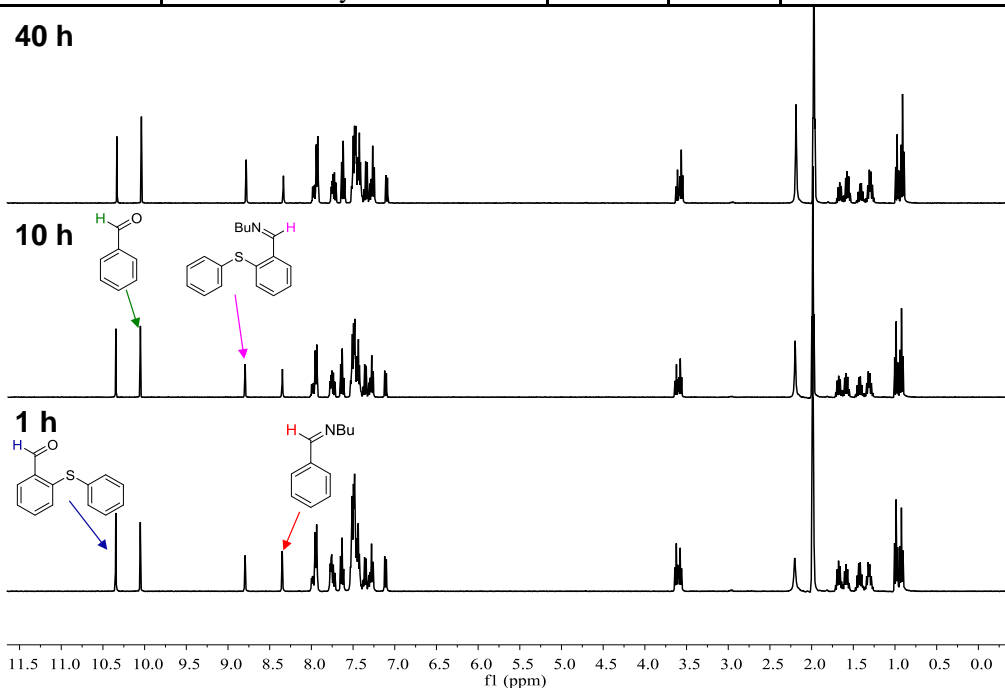

**Figure S71.** <sup>1</sup>H NMR spectra of the competition between 1(SPh) and 5 (1.0 equiv.) for the reaction with 1-butylamine (1.0 equiv.) in the presence of Zn(OTf)<sub>2</sub> (0.1 equiv.) in CD<sub>3</sub>CN at varied time (the corresponding spectra of panel a in Table S12).

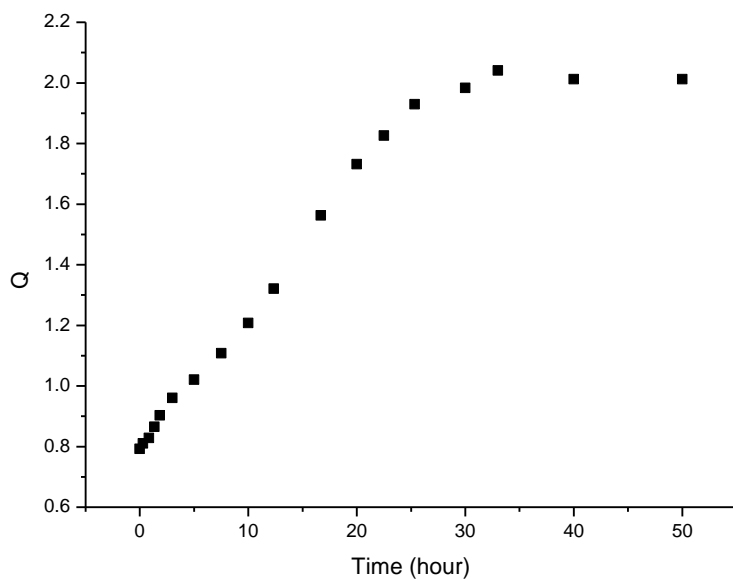

**Figure S72.** Kinetic profile of the competition between **1**(SPh) and **5** (1.0 equiv.) for the reaction with 1-butylamine (1.0 equiv.) in the presence of  $\text{Zn}(\text{OTf})_2$  (0.1 equiv.) in  $\text{CD}_3\text{CN}$  at varied time.

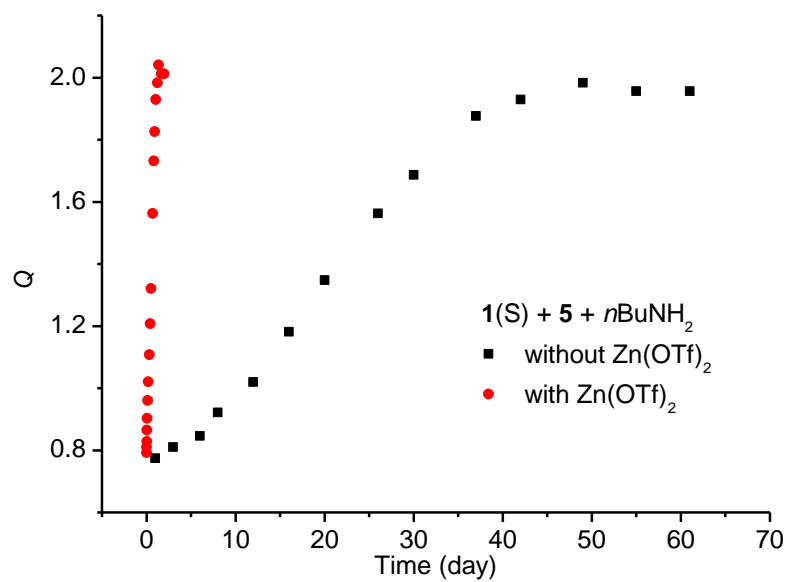

**Figure S73.** The effect of  $\text{Zn}(\text{OTf})_2$  (0.1 equiv.) on the kinetics of the reaction of **1**(SPh), **5** (1.0 equiv.), and 1-butylamine (1.0 equiv.).

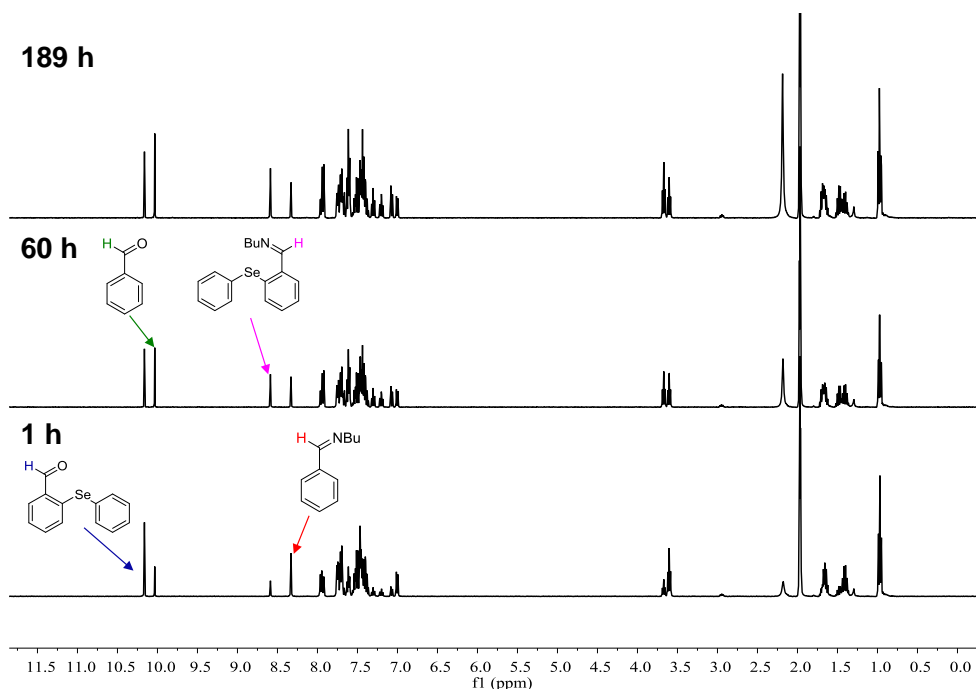

**Figure S74.** <sup>1</sup>H NMR spectra of the competition between **1**(SePh) and **5** (1.0 equiv.) for the reaction with 1-butylamine (1.0 equiv.) in the presence of Zn(OTf)<sub>2</sub> (0.1 equiv.) in CD<sub>3</sub>CN at varied time (the corresponding spectra of panel b in Table S12).

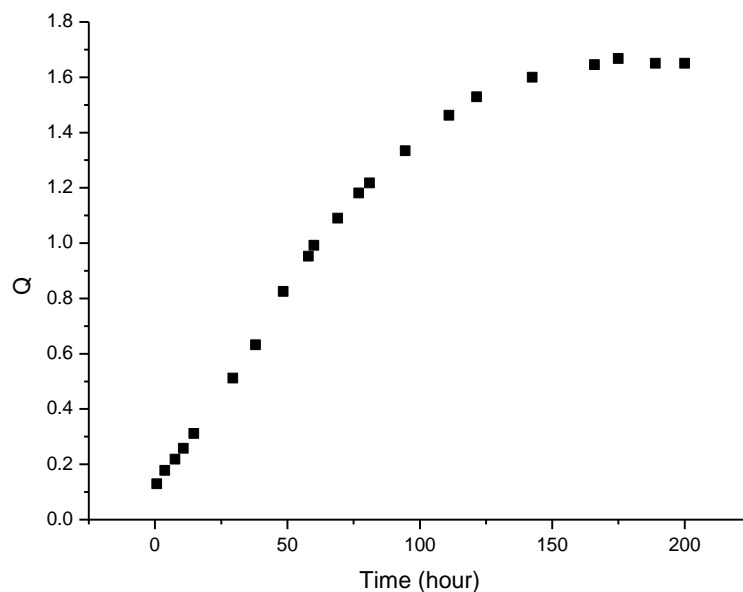

**Figure S75.** Kinetic profile of the competition between **1**(SePh) and **5** (1.0 equiv.) for the reaction with 1-butylamine (1.0 equiv.) in the presence of Zn(OTf)<sub>2</sub> (0.1 equiv.) in CD<sub>3</sub>CN at varied time.

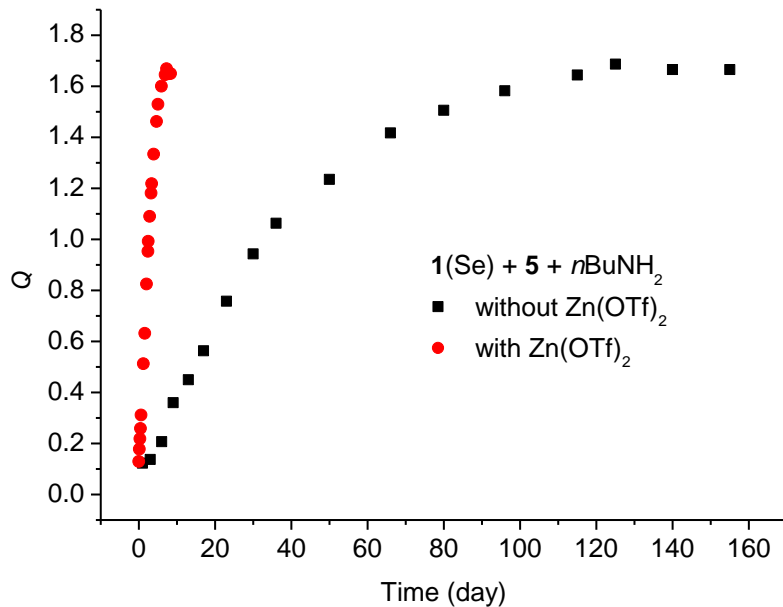

**Figure S76.** The effect of  $\text{Zn}(\text{OTf})_2$  (0.1 equiv.) on the kinetics of the reaction of **1**(SePh), **5** (1.0 equiv.), and 1-butylamine (1.0 equiv.).

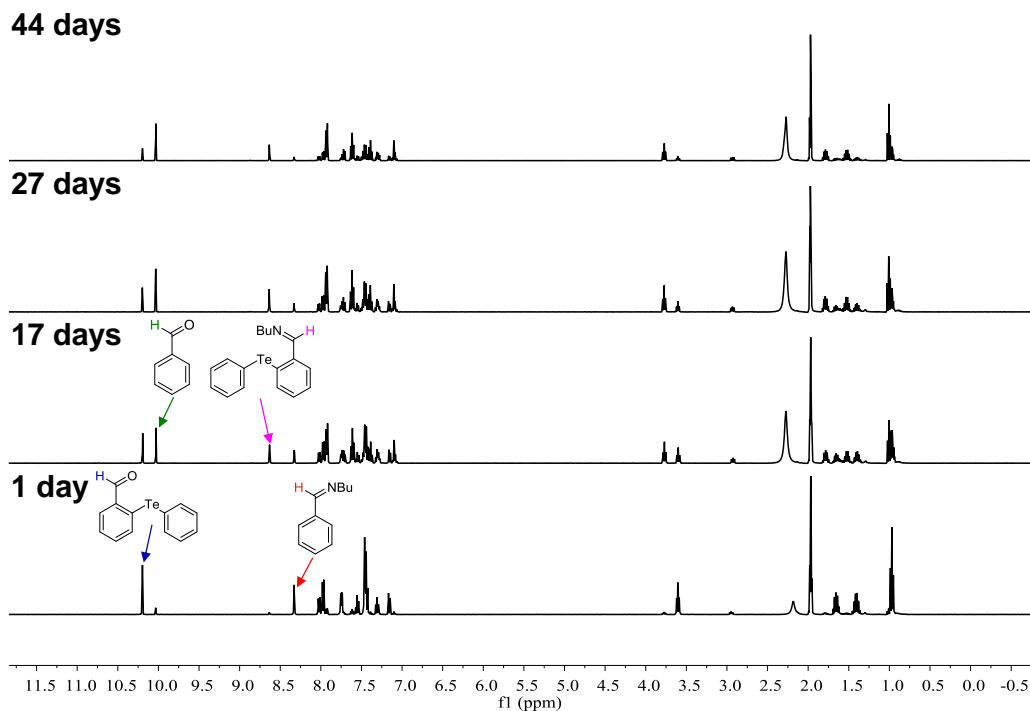

**Figure S77.**  $^1\text{H}$  NMR spectra of the competition between **1**(TePh) and **5** (1.0 equiv.) for the reaction with 1-butylamine (1.0 equiv.) in the presence of  $\text{Zn}(\text{OTf})_2$  (0.1 equiv.) in  $\text{CD}_3\text{CN}$  at varied time (the corresponding spectra of panel c in Table S12).

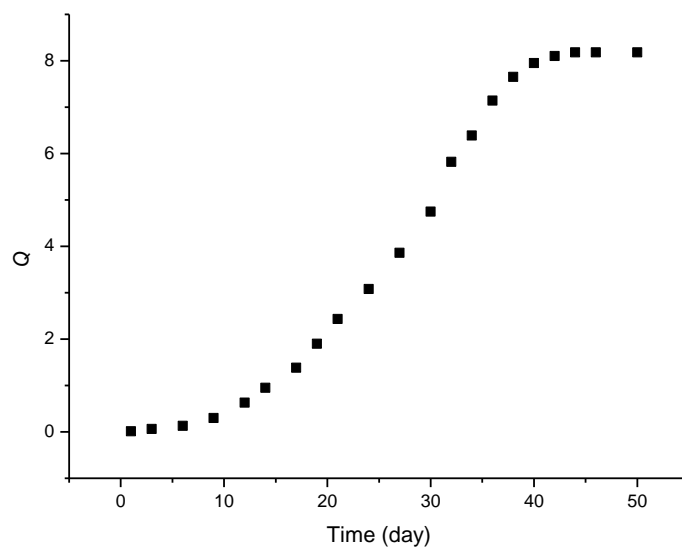

**Figure S78.** Kinetic profile of the competition between **1**(TePh) and **5** (1.0 equiv.) for the reaction with 1-butylamine (1.0 equiv.) in the presence of Zn(OTf)<sub>2</sub> (0.1 equiv.) in CD<sub>3</sub>CN at varied time.

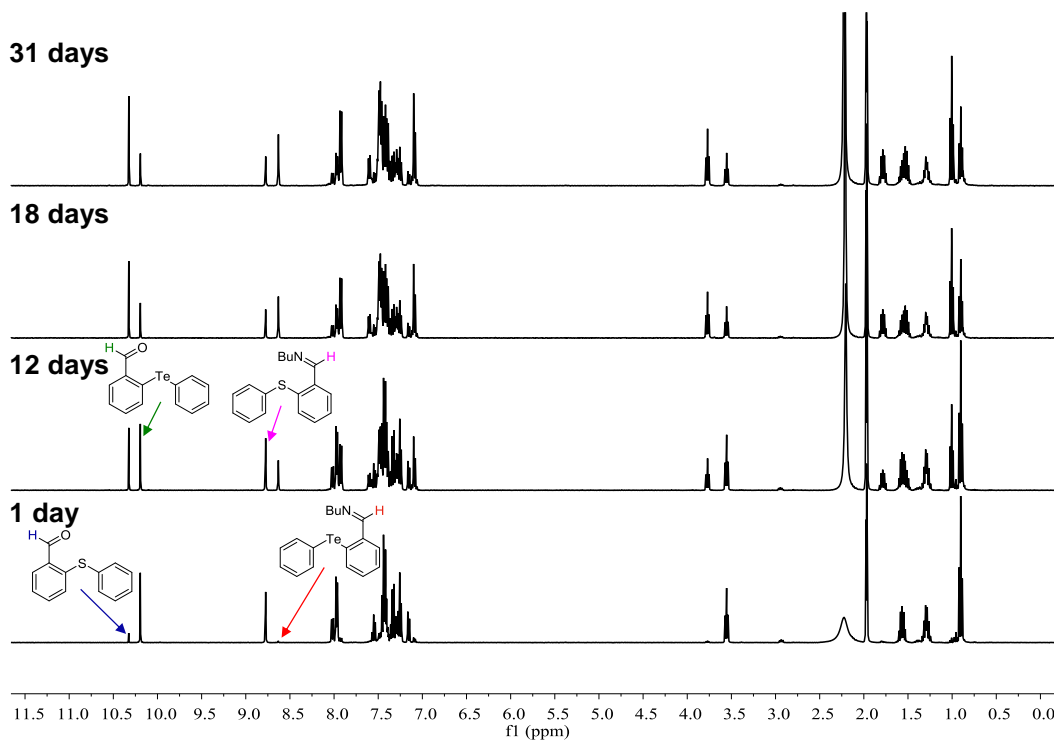

**Figure S79.** <sup>1</sup>H NMR spectra of the competition between **1**(SPh) and **1**(TePh) (1.0 equiv.) for the reaction with 1-butylamine (1.0 equiv.) in the presence of Zn(OTf)<sub>2</sub> (0.1 equiv.) in CD<sub>3</sub>CN at varied time (the corresponding spectra of panel d in Table S12).

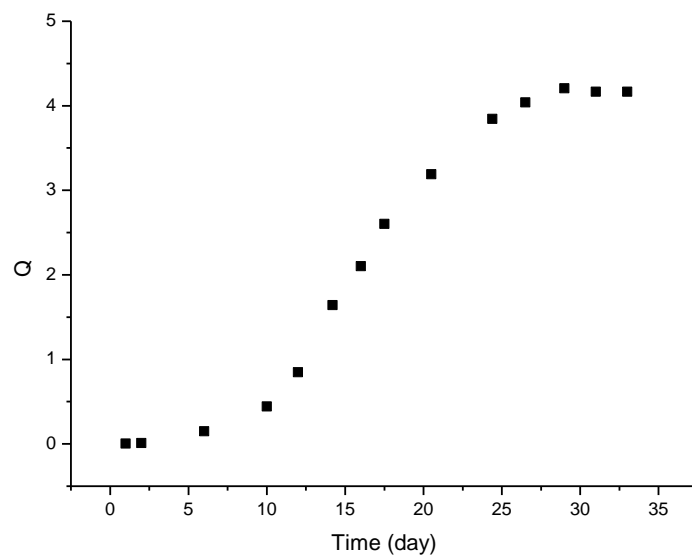

**Figure S80.** Kinetic profile of the competition between **1**(SPh) and **1**(TePh) (1.0 equiv.) for the reaction with 1-butylamine (1.0 equiv.) in the presence of Zn(OTf)<sub>2</sub> (0.1 equiv.) in CD<sub>3</sub>CN at varied time.

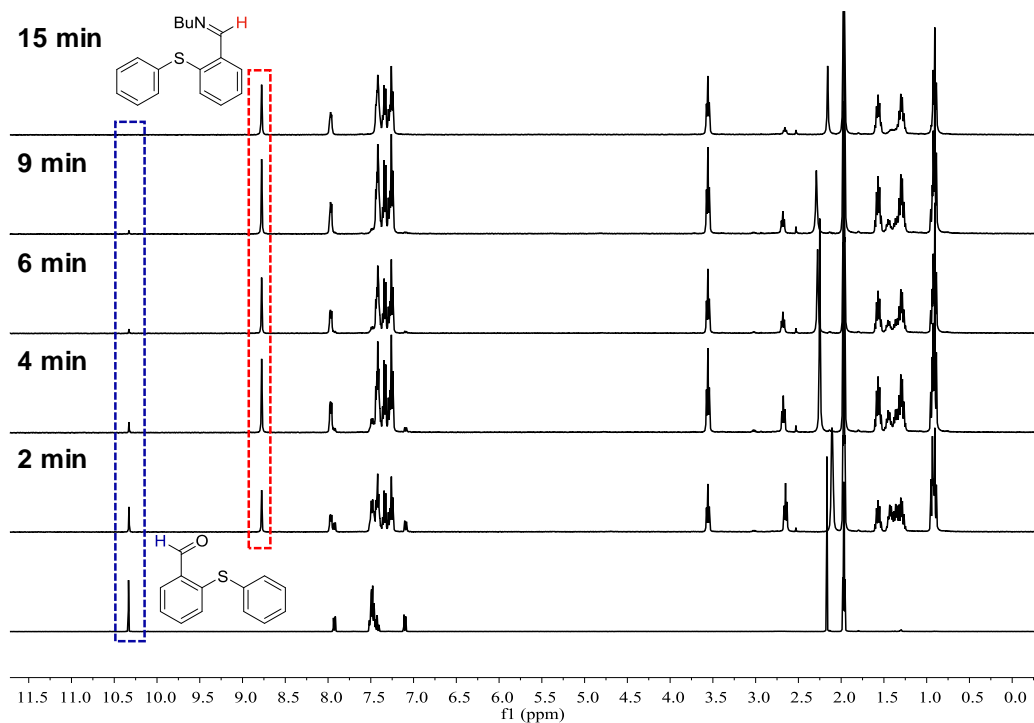

**Figure S81.** <sup>1</sup>H NMR spectra of the reaction of **1**(SPh) (15 mM, 1.0 equiv.) and 1-butylamine (1.2 equiv.) in the presence of Zn(OTf)<sub>2</sub> (0.1 equiv.) in CD<sub>3</sub>CN at varied time.

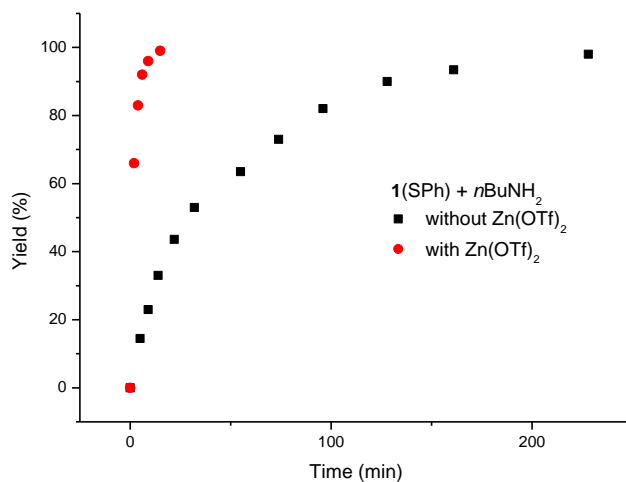

**Figure S82.** Kinetic profiles of the reactions of **1(SPh)** (15 mM, 1.0 equiv.) and 1-butylamine (1.2 equiv.) in the presence of  $\text{Zn}(\text{OTf})_2$  (0.1 equiv.) and in the absence of  $\text{Zn}(\text{OTf})_2$  in  $\text{CD}_3\text{CN}$ .

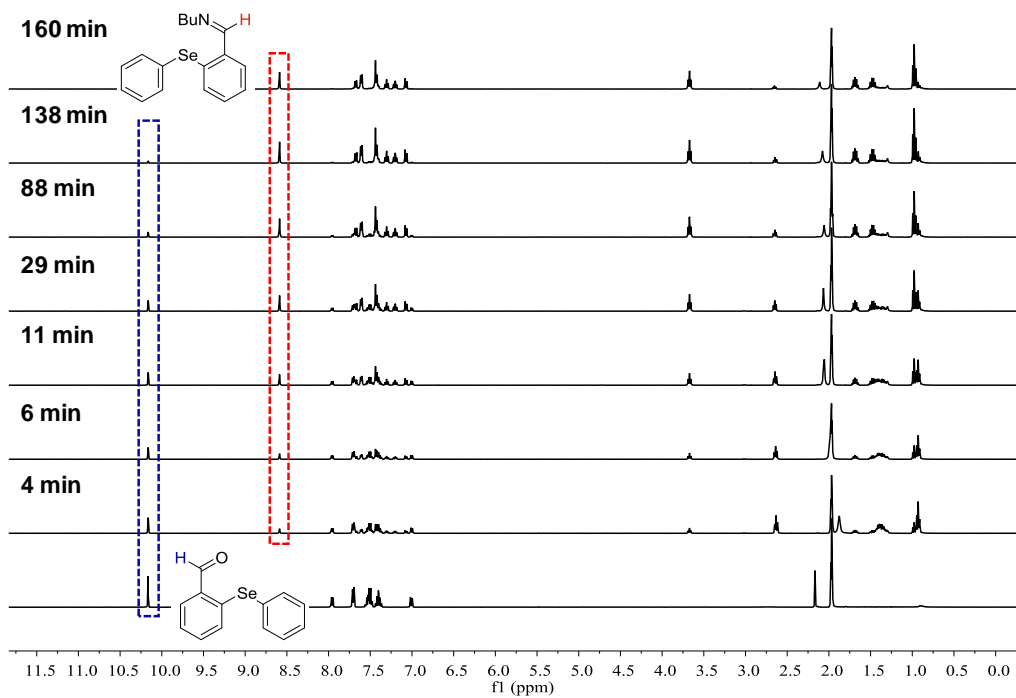

**Figure S83.**  $^1\text{H}$  NMR spectra of the reaction of **1(SePh)** (15 mM, 1.0 equiv.) and 1-butylamine (1.2 equiv.) in the presence of  $\text{Zn}(\text{OTf})_2$  (0.1 equiv.) in  $\text{CD}_3\text{CN}$  at varied time.



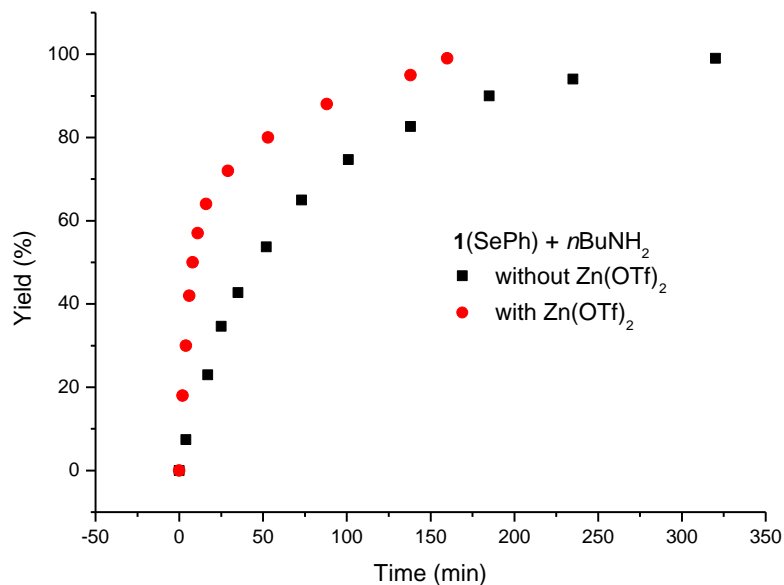

**Figure S84.** Kinetic profiles of the reactions of **1**(SePh) (15 mM, 1.0 equiv.) and 1-butylamine (1.2 equiv.) in the presence of Zn(OTf)<sub>2</sub> (0.1 equiv.) and in the absence of Zn(OTf)<sub>2</sub> in CD<sub>3</sub>CN.

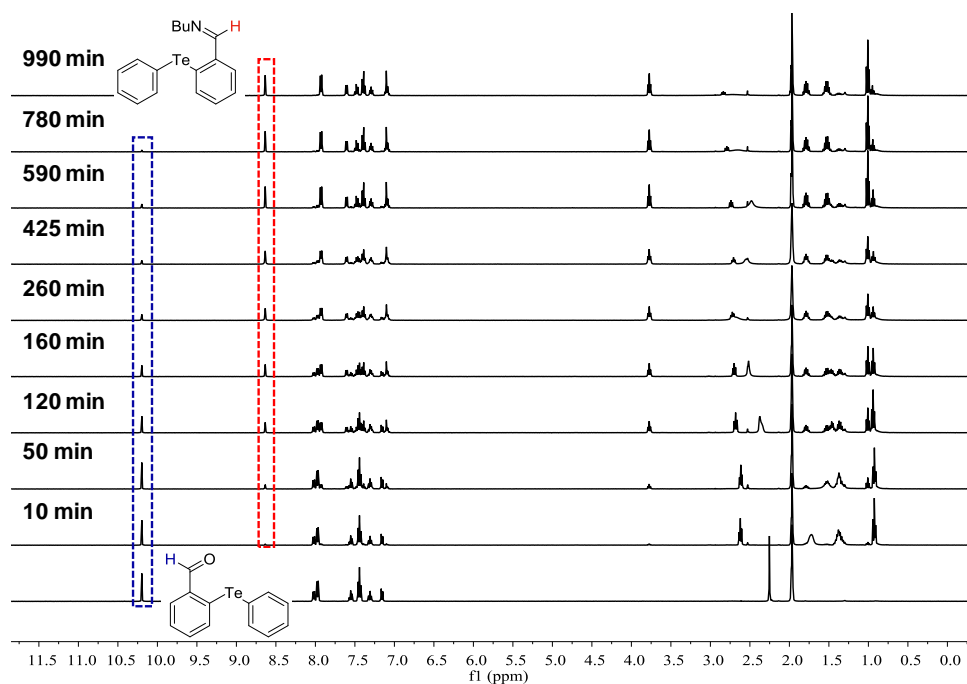

**Figure S85.** <sup>1</sup>H NMR spectra of the reaction of **1**(TePh) (15 mM, 1.0 equiv.) and 1-butylamine (1.2 equiv.) in the presence of Zn(OTf)<sub>2</sub> (0.1 equiv.) in CD<sub>3</sub>CN at varied time.

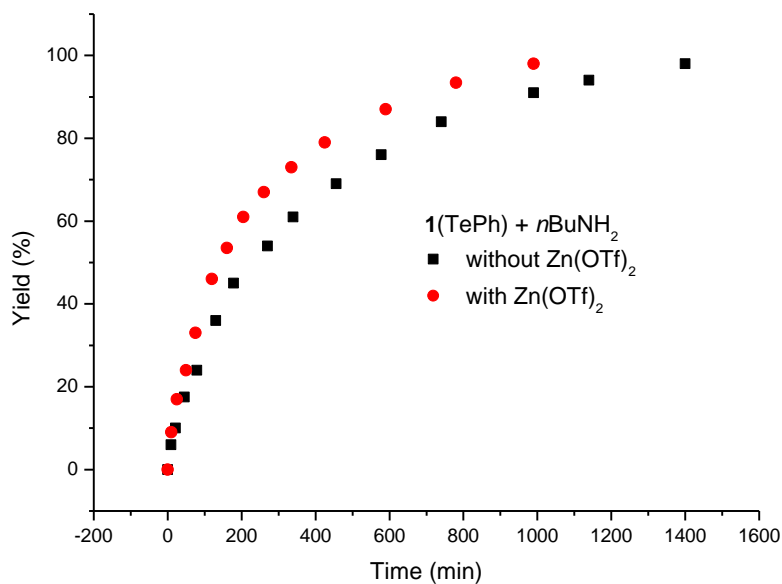

**Figure S86.** Kinetic profiles of the reactions of **1(TePh)** (15 mM, 1.0 equiv.) and 1-butylamine (1.2 equiv.) in the presence of  $\text{Zn}(\text{OTf})_2$  (0.1 equiv.) and in the absence of  $\text{Zn}(\text{OTf})_2$  in  $\text{CD}_3\text{CN}$ .

**Table S13.** The equilibrium constant and equilibrating time of the different imine exchange reactions in  $\text{CD}_3\text{CN}$ .

| Panel | Ch | Sequence of adding reagents                            | Solvent                | $K$  | Equilibrating time |
|-------|----|--------------------------------------------------------|------------------------|------|--------------------|
| a     | S  | 1(ChMe) and 5 simultaneously reacted with 1-butylamine | $\text{CD}_3\text{CN}$ | 0.97 | 3 days             |
| b     | Se |                                                        | $\text{CD}_3\text{CN}$ | 0.88 | 12 days            |
| c     | Te |                                                        | $\text{CD}_3\text{CN}$ | 2.9  | 21 days            |
|       |    |                                                        |                        |      |                    |

| Panel |    | Sequence of adding reagents                            | Solvent            | <i>K</i> | Equilibrating time |
|-------|----|--------------------------------------------------------|--------------------|----------|--------------------|
| d     | S  | 3(ChMe) and 5 simultaneously reacted with 1-butylamine | CD <sub>3</sub> CN | 0.57     | 1 day              |
| e     | Se |                                                        | CD <sub>3</sub> CN | 0.66     | 1 day              |
| f     | Te |                                                        | CD <sub>3</sub> CN | 0.87     | 1 day              |

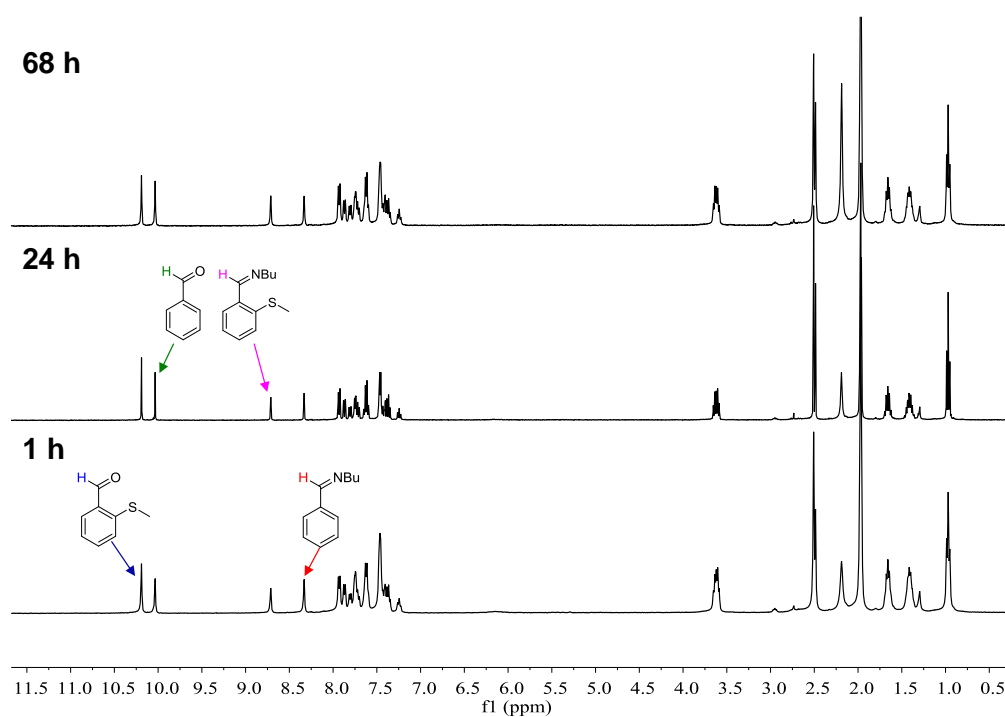

**Figure S87.** <sup>1</sup>H NMR spectra of the competition between 1(SMe) and 5 (1.0 equiv.) for the reaction with 1-butylamine (1.0 equiv.) in the presence of Zn(OTf)<sub>2</sub> (0.1 equiv.) in CD<sub>3</sub>CN at varied time (the corresponding spectra of panel a in Table S13).

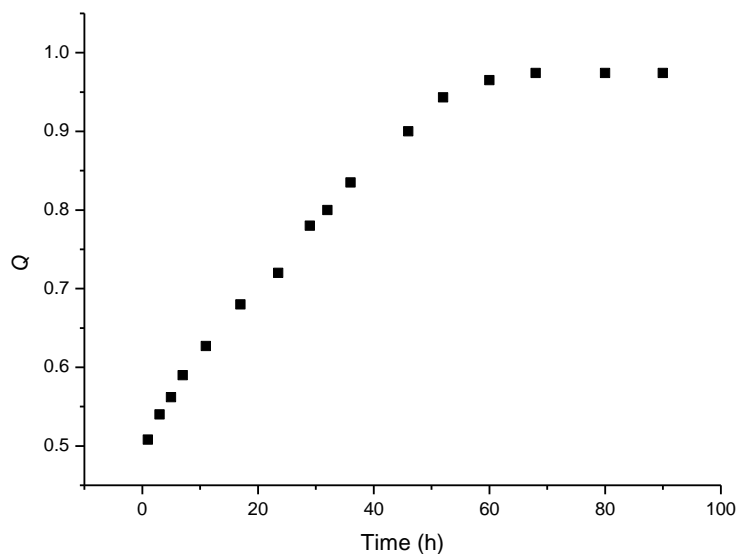

**Figure S88.** Kinetic profile of the competition between **1**(SMe) and **5** (1.0 equiv.) for the reaction with 1-butylamine (1.0 equiv.) in the presence of Zn(OTf)<sub>2</sub> (0.1 equiv.) in CD<sub>3</sub>CN at varied time.

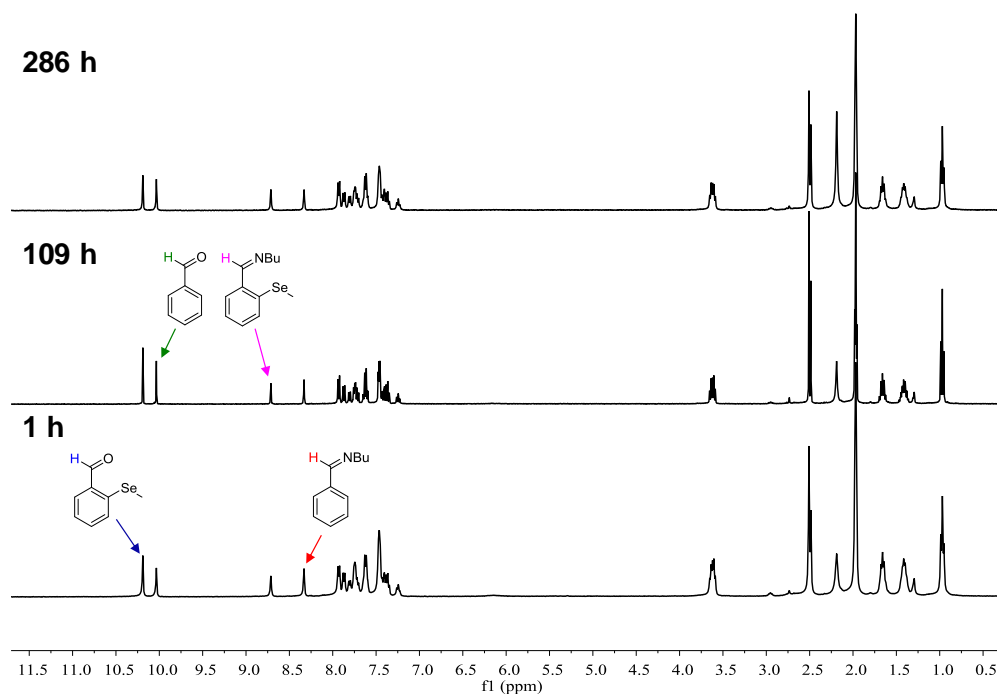

**Figure S89.** <sup>1</sup>H NMR spectra of the competition between **1**(SeMe) and **5** (1.0 equiv.) for the reaction with 1-butylamine (1.0 equiv.) in the presence of Zn(OTf)<sub>2</sub> (0.1 equiv.) in CD<sub>3</sub>CN at varied time (the corresponding spectra of panel b in Table S13).

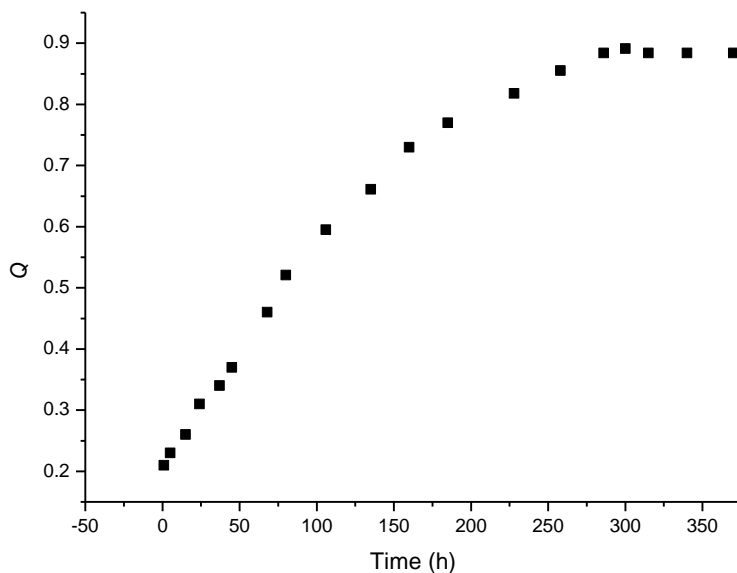

**Figure S90.** Kinetic profile of the competition between **1**(SeMe) and **5** (1.0 equiv.) for the reaction with 1-butylamine (1.0 equiv.) in the presence of Zn(OTf)<sub>2</sub> (0.1 equiv.) in CD<sub>3</sub>CN at varied time.

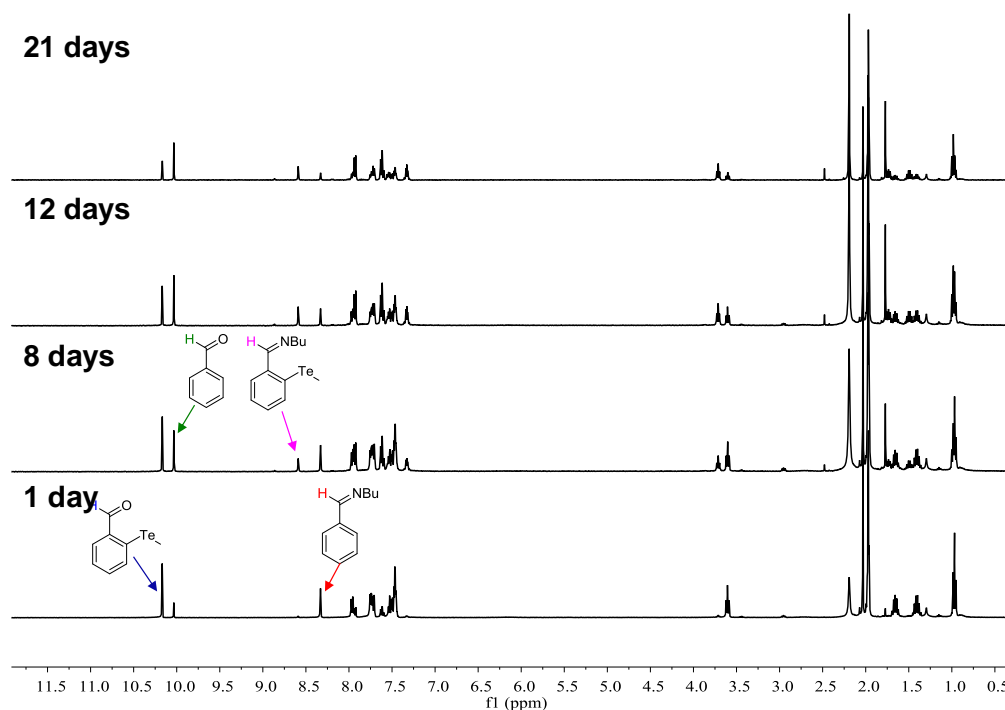

**Figure S91.** <sup>1</sup>H NMR spectra of the competition between **1**(TeMe) and **5** (1.0 equiv.) for the reaction with 1-butylamine (1.0 equiv.) in the presence of Zn(OTf)<sub>2</sub> (0.1 equiv.) in CD<sub>3</sub>CN at varied time (the corresponding spectra of panel c in Table S13).

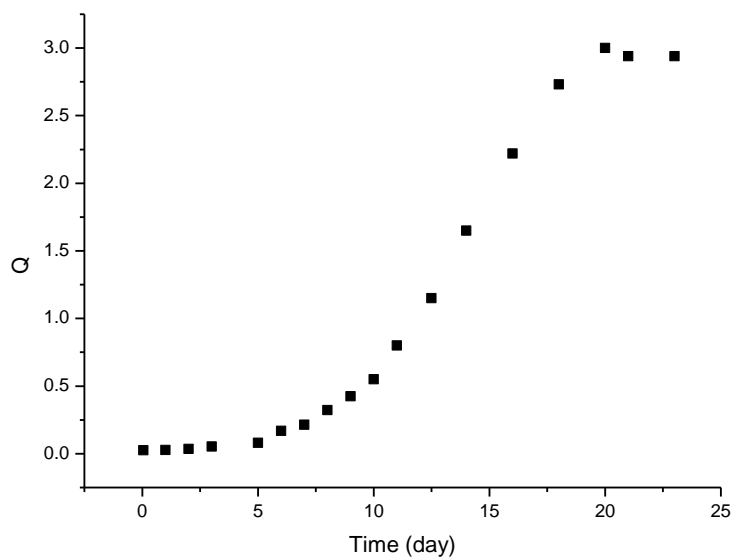

**Figure S92.** Kinetic profile of the competition between **1**(TeMe) and **5** (1.0 equiv.) for the reaction with 1-butylamine (1.0 equiv.) in the presence of Zn(OTf)<sub>2</sub> (0.1 equiv.) in CD<sub>3</sub>CN at varied time.

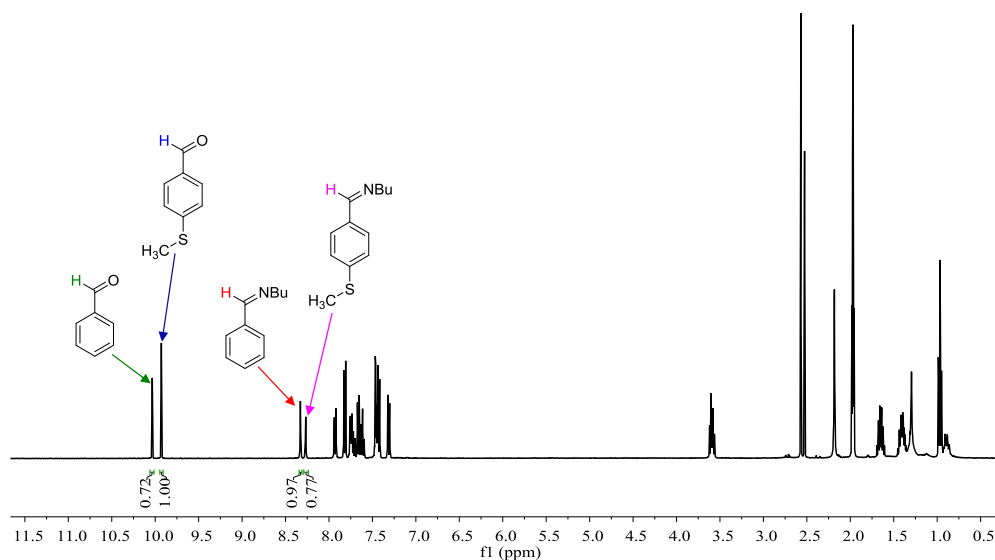

**Figure S93.** <sup>1</sup>H NMR spectrum of the competition between **3**(SMe) and **5** for the reaction with 1-butylamine in CD<sub>3</sub>CN (the corresponding spectra of panel d in Table S13).

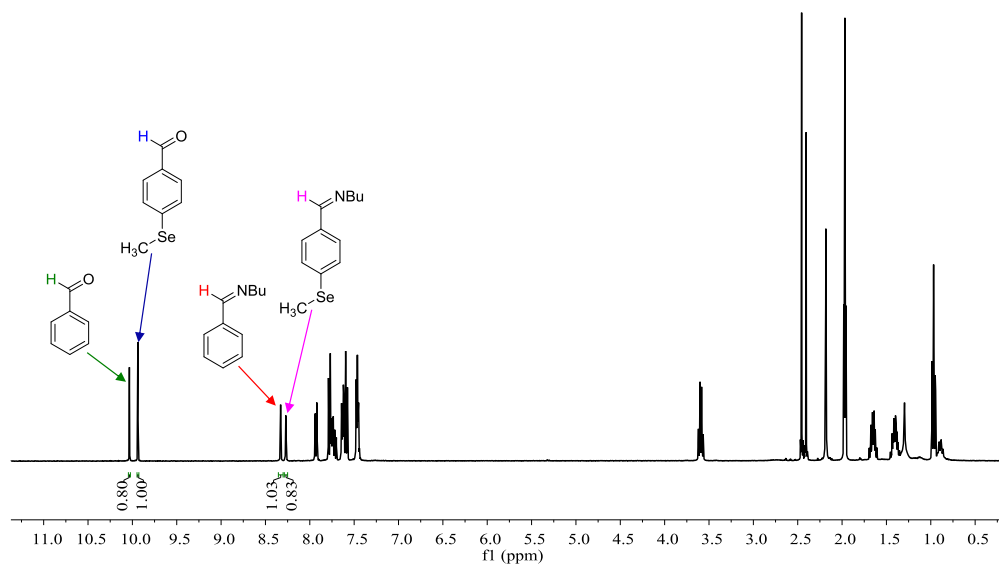

**Figure S94.** <sup>1</sup>H NMR spectrum of the competition between **3(SeMe)** and **5** for the reaction with 1-butylamine in CD<sub>3</sub>CN (the corresponding spectra of panel e in Table S13).

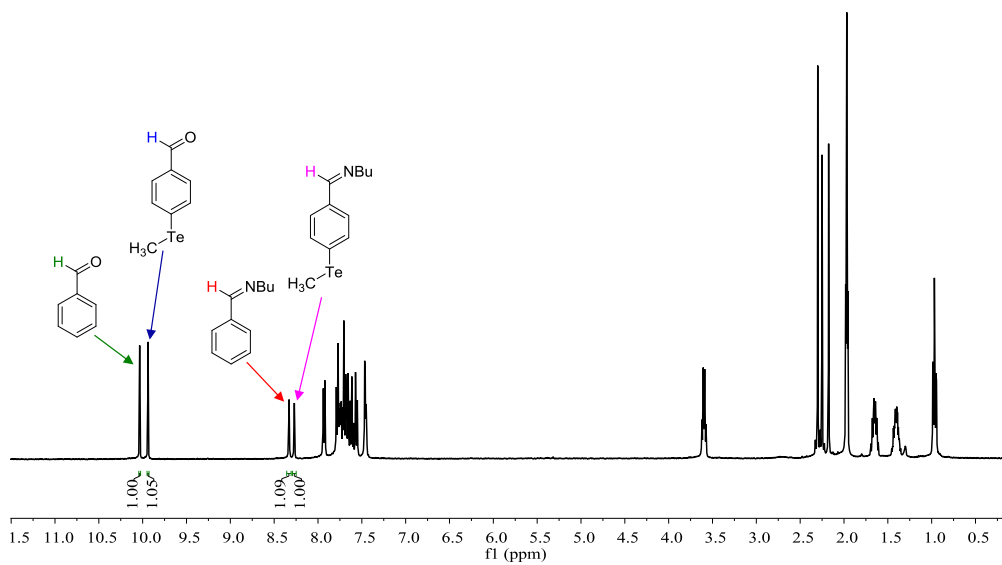

**Figure S95.** <sup>1</sup>H NMR spectrum of the competition between **3(TeMe)** and **5** for the reaction with 1-butylamine in CD<sub>3</sub>CN (the corresponding spectra of panel f in Table S13).

**Scheme S3.** The effect of Lewis acid on imine exchange in CD<sub>3</sub>CN.

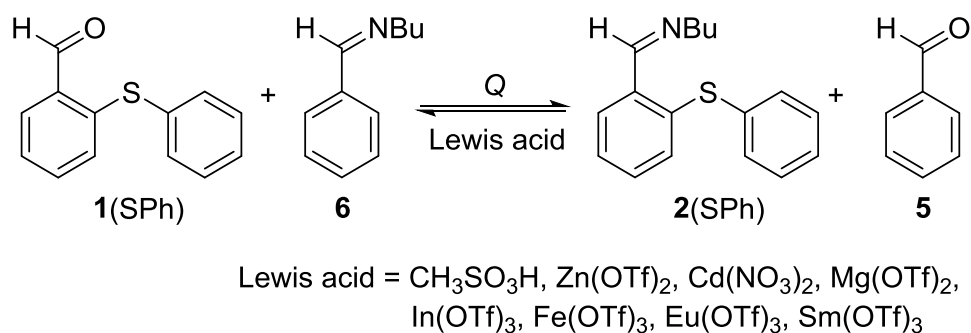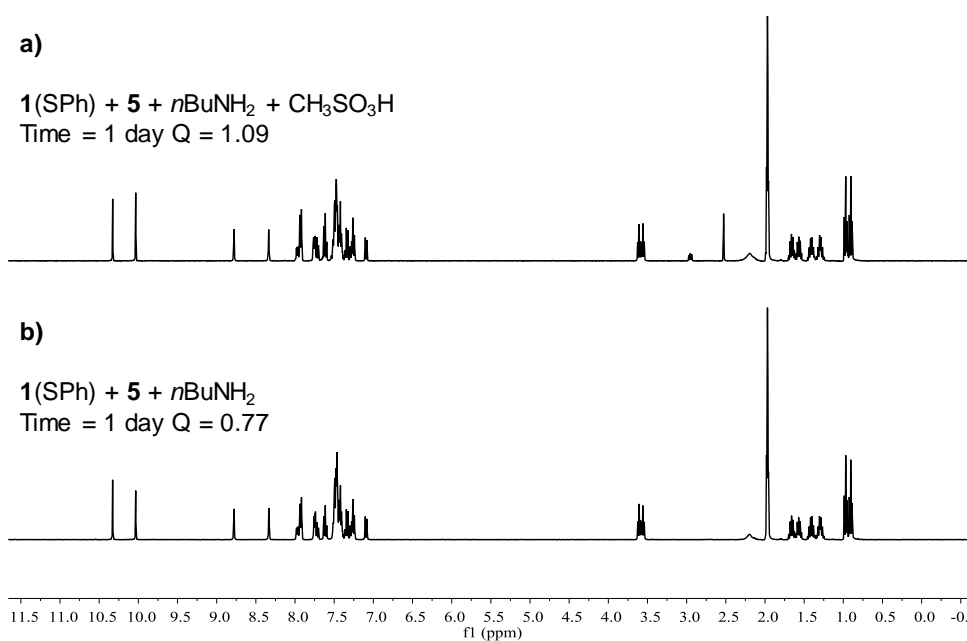

**Figure S96.** <sup>1</sup>H NMR spectra of the competition between **1(SPh)** and **5** (1.0 equiv.) for the reaction with 1-butylamine (1.0 equiv.) in CD<sub>3</sub>CN. (a) In the presence of CH<sub>3</sub>SO<sub>3</sub>H (0.1 equiv.), (b) In the absence of CH<sub>3</sub>SO<sub>3</sub>H.



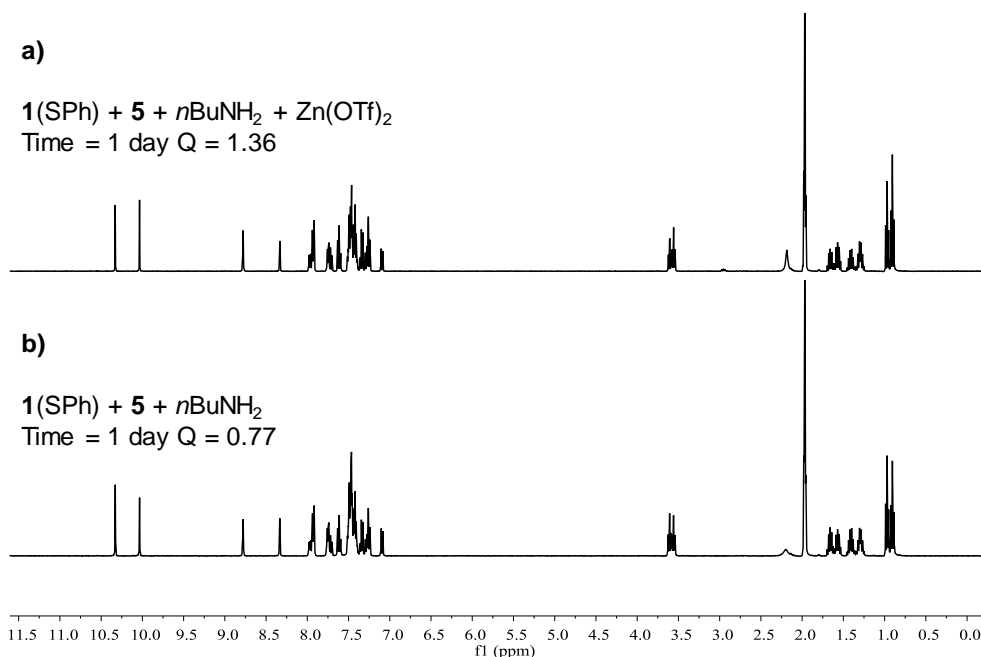

**Figure S97.**  $^1\text{H}$  NMR spectra of the competition between **1**(SPh) and **5** (1.0 equiv.) for the reaction with 1-butylamine (1.0 equiv.) in  $\text{CD}_3\text{CN}$ . (a) In the presence of  $\text{Zn}(\text{OTf})_2$  (0.1 equiv.) (b) In the absence of  $\text{Zn}(\text{OTf})_2$ .

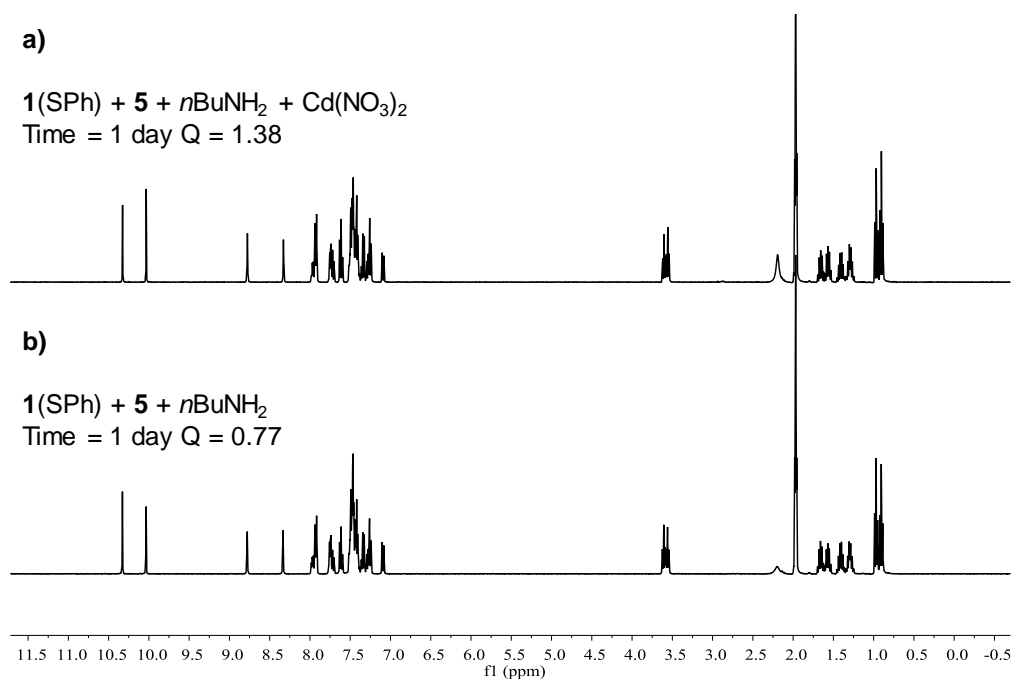

**Figure S98.**  $^1\text{H}$  NMR spectra of the competition between **1**(SPh) and **5** (1.0 equiv.) for the reaction with 1-butylamine (1.0 equiv.) in  $\text{CD}_3\text{CN}$ . (a) In the presence of  $\text{Cd}(\text{NO}_3)_2$  (0.1 equiv.) (b) In the absence of  $\text{Cd}(\text{NO}_3)_2$ .

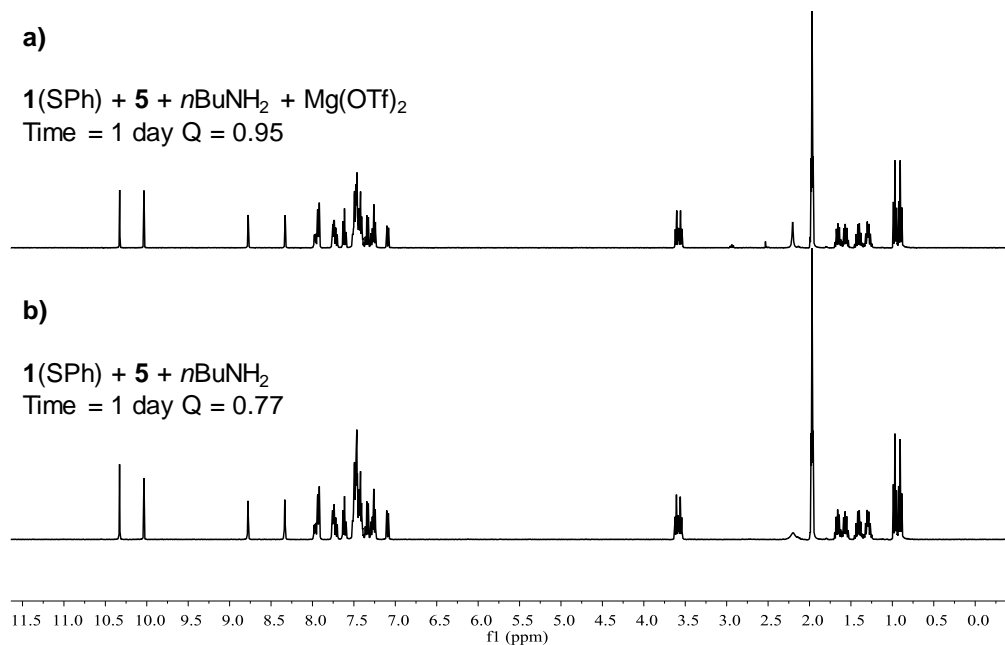

**Figure S99.**  $^1\text{H}$  NMR spectra of the competition between **1**(SPh) and **5** (1.0 equiv.) for the reaction with 1-butylamine (1.0 equiv.) in  $\text{CD}_3\text{CN}$ . (a) In the presence of  $\text{Mg}(\text{OTf})_2$  (0.1 equiv.) (b) In the absence of  $\text{Mg}(\text{OTf})_2$ .

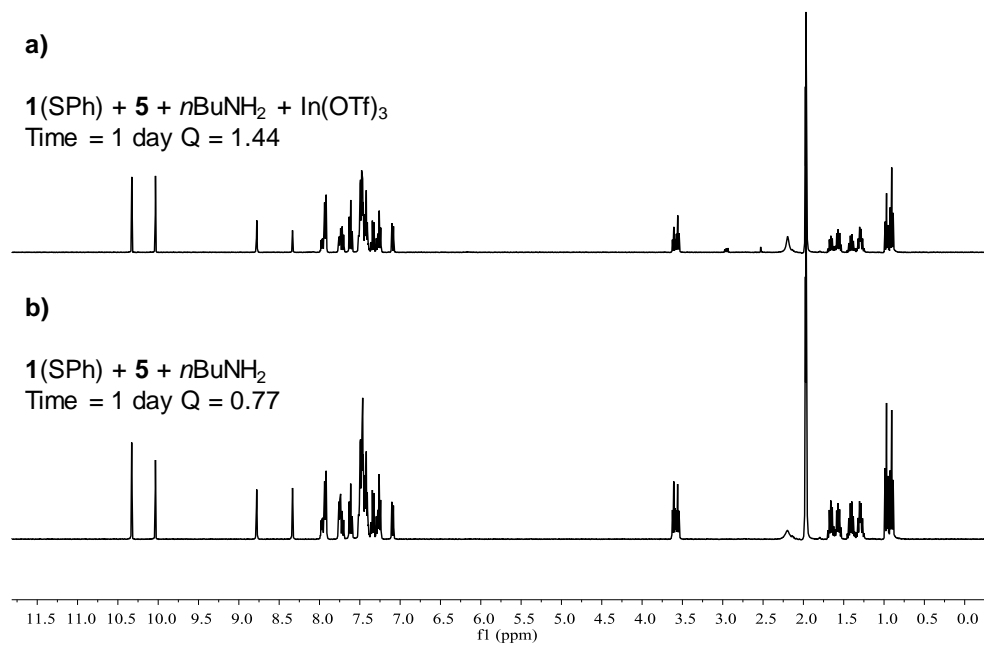

**Figure S100.**  $^1\text{H}$  NMR spectra of the competition between **1**(SPh) and **5** (1.0 equiv.) for the reaction with 1-butylamine (1.0 equiv.) in  $\text{CD}_3\text{CN}$ . (a) In the presence of  $\text{In}(\text{OTf})_3$  (0.1 equiv.) (b) In the absence of  $\text{In}(\text{OTf})_3$ .

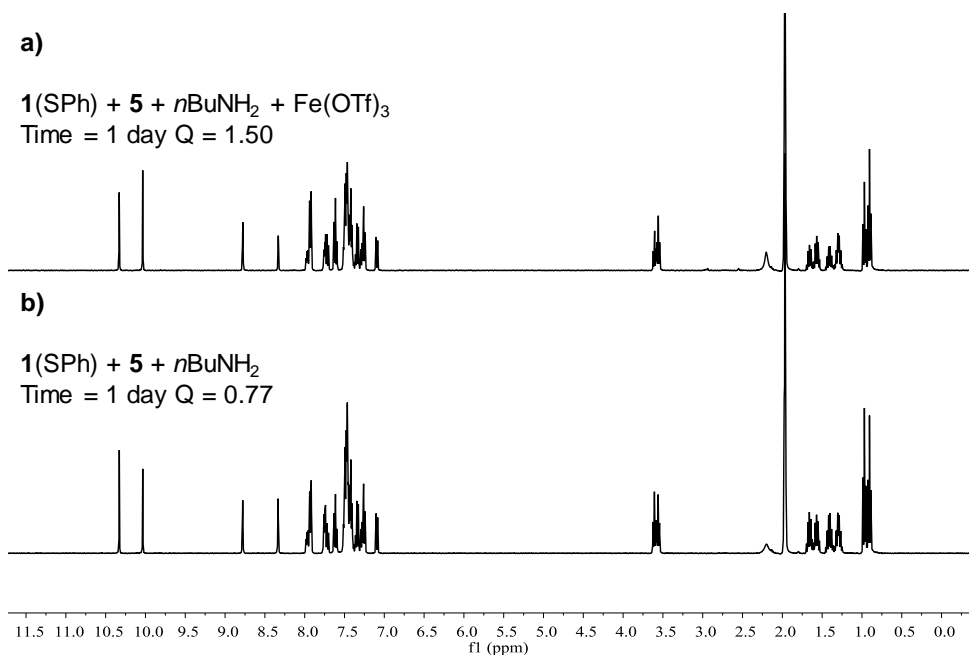

**Figure S101.**  $^1\text{H}$  NMR spectra of the competition between **1**(SPh) and **5** (1.0 equiv.) for the reaction with 1-butylamine (1.0 equiv.) in  $\text{CD}_3\text{CN}$ . (a) In the presence of  $\text{Fe}(\text{OTf})_3$  (0.1 equiv.) (b) In the absence of  $\text{Fe}(\text{OTf})_3$ .

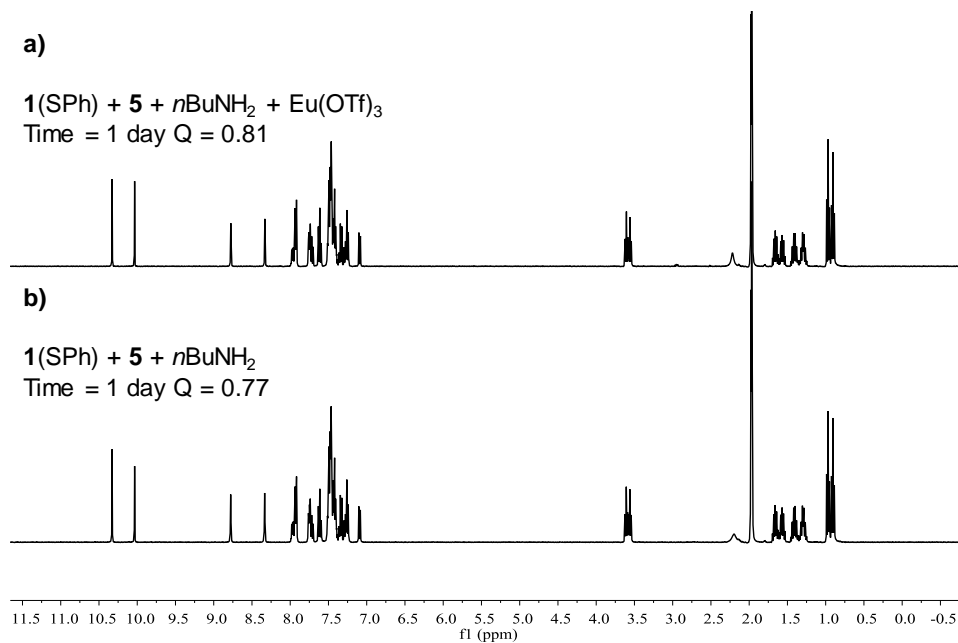

**Figure S102.**  $^1\text{H}$  NMR spectra of the competition between **1**(SPh) and **5** (1.0 equiv.) for the reaction with 1-butylamine (1.0 equiv.) in  $\text{CD}_3\text{CN}$ . (a) In the presence of  $\text{Eu}(\text{OTf})_3$  (0.1 equiv.) (b) In the absence of  $\text{Eu}(\text{OTf})_3$ .

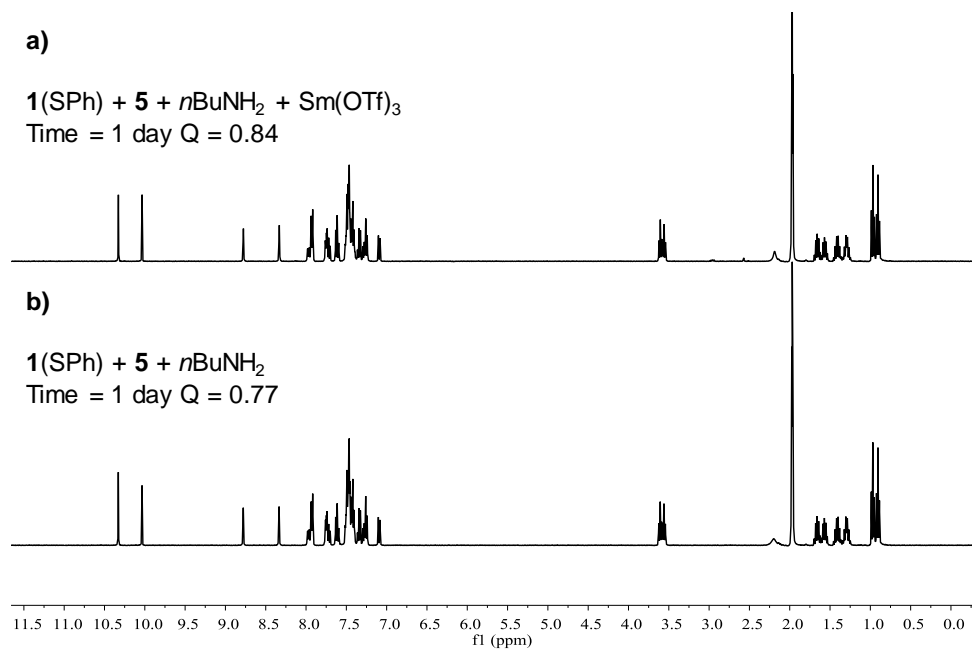

**Figure S103.**  $^1\text{H}$  NMR spectra of the competition between **1**(SPh) and **5** (1.0 equiv.) for the reaction with 1-butylamine (1.0 equiv.) in  $\text{CD}_3\text{CN}$ . (a) In the presence of  $\text{Sm}(\text{OTf})_3$  (0.1 equiv.) (b) In the absence of  $\text{Sm}(\text{OTf})_3$ .

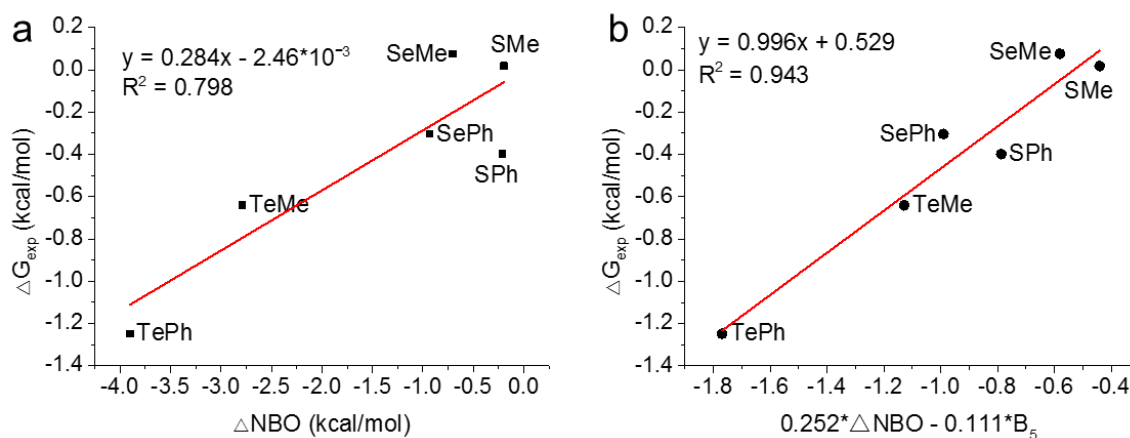

**Figure S104.** (a) Correlation between  $\Delta G$  values of imine exchange **1** and  $\Delta\text{NBO}$  of conformers **1** of **1/2**, (b) Multivariate correlation of  $\Delta G$  values of imine exchange **1** with  $\Delta\text{NBO}$  of conformers **1** of **1/2** and sterimol parameter ( $B_5$ ) of ChalR.

## 6. Molecular Coordinates

### 1(SPh)-conformer 1 (acetonitrile)

Imaginary frequency: 0

G = -974.635937 hartree

|   |             |             |             |
|---|-------------|-------------|-------------|
| C | -2.80895800 | -2.28176700 | -0.00002500 |
| C | -3.30537900 | -0.99257400 | 0.00001500  |
| C | -2.45461500 | 0.11436500  | -0.00000300 |
| C | -1.05649100 | -0.07056300 | 0.00000500  |
| C | -0.56686800 | -1.37675700 | -0.00006000 |
| C | -1.43153800 | -2.46130200 | -0.00006400 |
| H | -3.47740800 | -3.13128100 | -0.00004400 |
| H | -4.37522500 | -0.81887900 | 0.00002500  |
| H | 0.49808800  | -1.55722600 | -0.00013600 |
| H | -1.01544300 | -3.46068800 | -0.00008500 |
| C | -3.10220700 | 1.43280100  | 0.00002200  |
| H | -4.20566400 | 1.39532900  | -0.00009400 |
| C | 1.62071100  | 0.57805300  | -0.00009400 |
| C | 2.25954200  | 0.30389800  | -1.20573700 |
| C | 2.25932100  | 0.30380700  | 1.20570300  |
| C | 3.53069100  | -0.25447100 | -1.20342900 |
| H | 1.75806600  | 0.52443400  | -2.13947200 |
| C | 3.53044000  | -0.25454700 | 1.20361400  |
| H | 1.75762000  | 0.52429800  | 2.13932500  |
| C | 4.16533200  | -0.53508100 | 0.00013100  |
| H | 4.02487800  | -0.46870400 | -2.14194900 |
| H | 4.02448400  | -0.46886000 | 2.14219200  |
| H | 5.15652600  | -0.96937700 | 0.00023200  |
| S | 0.01459300  | 1.33871500  | -0.00011400 |
| O | -2.52741200 | 2.49704300  | 0.00017000  |

### 1(SPh)-conformer 2 (acetonitrile)

Imaginary frequency: 0

G = -974.636049 hartree

|   |             |             |             |
|---|-------------|-------------|-------------|
| C | -2.77434000 | 2.18060700  | 0.08121400  |
| C | -3.20165100 | 0.88538400  | -0.12733400 |
| C | -2.31034200 | -0.18750800 | -0.04693800 |
| C | -0.96308600 | 0.04912400  | 0.26568500  |
| C | -0.53934300 | 1.36057800  | 0.48260500  |
| C | -1.43442500 | 2.41157400  | 0.38336900  |
| H | -3.46936800 | 3.00594300  | 0.01005200  |
| H | -4.23386300 | 0.66980700  | -0.37135800 |
| H | 0.49337800  | 1.55782400  | 0.73604800  |
| H | -1.08344400 | 3.42129700  | 0.55349200  |
| C | -2.82770300 | -1.54395100 | -0.33257800 |
| H | -2.07644000 | -2.34237200 | -0.43462900 |
| C | 1.72394400  | -0.58673200 | 0.09707800  |
| C | 2.71437800  | -0.58205700 | 1.07197100  |
| C | 1.98637600  | -0.07450500 | -1.17200400 |

|   |             |             |             |
|---|-------------|-------------|-------------|
| C | 3.97115300  | -0.06629400 | 0.77608000  |
| H | 2.50060700  | -0.97574000 | 2.05710100  |
| C | 3.23512600  | 0.45544200  | -1.45433000 |
| H | 1.21199600  | -0.08953900 | -1.92868000 |
| C | 4.23064700  | 0.45662300  | -0.48220400 |
| H | 4.74166400  | -0.06607300 | 1.53578700  |
| H | 3.43571900  | 0.85898800  | -2.43817000 |
| H | 5.20689800  | 0.86471800  | -0.70855600 |
| S | 0.15129100  | -1.31817500 | 0.46965000  |
| O | -4.00152500 | -1.79547200 | -0.47264500 |

### 1(SPh)-conformer 3 (acetonitrile)

Imaginary frequency: 0

G = -974.634701 hartree

|   |             |             |             |
|---|-------------|-------------|-------------|
| C | -3.61370900 | 0.37154800  | 0.79783500  |
| C | -2.67431400 | 1.18941400  | 0.19158000  |
| C | -1.51877400 | 0.65243300  | -0.36908900 |
| C | -1.28838600 | -0.72816600 | -0.28883800 |
| C | -2.23062100 | -1.54415500 | 0.32669800  |
| C | -3.39338200 | -0.99821900 | 0.85536300  |
| H | -4.51313600 | 0.79767800  | 1.22120800  |
| H | -2.82743100 | 2.25886100  | 0.12477500  |
| H | -2.04434400 | -2.60736600 | 0.40039100  |
| H | -4.11969500 | -1.64700200 | 1.32705000  |
| C | -0.58378700 | 1.57080700  | -1.06744700 |
| H | 0.16449000  | 1.09826000  | -1.72169400 |
| C | 1.48601300  | -0.66326600 | -0.15649000 |
| C | 2.70456600  | -0.59916700 | -0.82853400 |
| C | 1.36551800  | -0.11679300 | 1.11823000  |
| C | 3.79758000  | 0.00416800  | -0.22283400 |
| H | 2.79308000  | -1.01369600 | -1.82507500 |
| C | 2.46006000  | 0.50063100  | 1.70795100  |
| H | 0.42436000  | -0.17232200 | 1.65003500  |
| C | 3.67848400  | 0.56111300  | 1.04381800  |
| H | 4.74100000  | 0.04975000  | -0.75115400 |
| H | 2.35815800  | 0.92897500  | 2.69663700  |
| S | 0.15381600  | -1.50726100 | -0.97254900 |
| O | -0.63771000 | 2.77244300  | -0.96504900 |
| H | 4.52865300  | 1.04139400  | 1.50954100  |

### 1(SePh)-conformer 1 (acetonitrile)

Imaginary frequency: 0

G = -2978.026234 hartree

|   |            |            |             |
|---|------------|------------|-------------|
| C | 2.78908300 | 2.54660100 | -0.00012300 |
| C | 3.33552700 | 1.27768100 | -0.00003600 |
| C | 2.52308900 | 0.14188400 | -0.00000500 |
| C | 1.12299800 | 0.27570000 | -0.00006800 |

|    |             |             |             |
|----|-------------|-------------|-------------|
| C  | 0.58152100  | 1.55881500  | -0.00015700 |
| C  | 1.40563300  | 2.67580600  | -0.00018500 |
| H  | 3.42483500  | 3.42097500  | -0.00013800 |
| H  | 4.41120100  | 1.14403400  | 0.00002100  |
| H  | -0.48996500 | 1.69906400  | -0.00019300 |
| H  | 0.95396200  | 3.65966700  | -0.00024900 |
| C  | 3.20649300  | -1.15724100 | 0.00010200  |
| H  | 4.30832200  | -1.09869000 | 0.00017000  |
| C  | -1.71151200 | -0.41256300 | 0.00002800  |
| C  | -2.33954300 | -0.11395700 | -1.20524300 |
| C  | -2.33927400 | -0.11343500 | 1.20532100  |
| C  | -3.58938700 | 0.49220700  | -1.20313400 |
| H  | -1.84998700 | -0.35028100 | -2.14142300 |
| C  | -3.58910000 | 0.49273700  | 1.20323200  |
| H  | -1.84949100 | -0.34935800 | 2.14148500  |
| C  | -4.21342400 | 0.79655700  | 0.00004900  |
| H  | -4.07463000 | 0.72559600  | -2.14190300 |
| H  | -4.07413300 | 0.72655400  | 2.14200300  |
| H  | -5.18737300 | 1.26836800  | 0.00006700  |
| O  | 2.65038400  | -2.23225400 | 0.00012900  |
| Se | 0.00387000  | -1.28684300 | 0.00001300  |

**1(SePh)-conformer 2 (acetonitrile)**

Imaginary frequency: 0

G = -2978.023755 hartree

|    |             |             |             |
|----|-------------|-------------|-------------|
| C  | 2.71804200  | 2.49094900  | 0.00001700  |
| C  | 3.25816500  | 1.22008400  | 0.00001200  |
| C  | 2.43649900  | 0.09153600  | 0.00008600  |
| C  | 1.04163700  | 0.24175300  | 0.00011800  |
| C  | 0.50234800  | 1.52535600  | 0.00002200  |
| C  | 1.33470200  | 2.63497400  | -0.00000600 |
| H  | 3.36017100  | 3.36094300  | -0.00000400 |
| H  | 4.32988400  | 1.06789600  | -0.00002200 |
| H  | -0.56892200 | 1.66921200  | -0.00004500 |
| H  | 0.89274000  | 3.62321100  | -0.00008900 |
| C  | 3.08207300  | -1.23846500 | 0.00001600  |
| H  | 2.40990200  | -2.11289100 | 0.00060200  |
| C  | -1.81144100 | -0.46372800 | 0.00003800  |
| C  | -2.43552000 | -0.16610300 | -1.20698000 |
| C  | -2.43564400 | -0.16581000 | 1.20689100  |
| C  | -3.68511600 | 0.44006100  | -1.20370700 |
| H  | -1.94474200 | -0.40269600 | -2.14199700 |
| C  | -3.68521700 | 0.44042500  | 1.20334100  |
| H  | -1.94499800 | -0.40216700 | 2.14204100  |
| C  | -4.30874100 | 0.74391400  | -0.00025300 |
| H  | -4.17009600 | 0.67381700  | -2.14237700 |
| H  | -4.17021700 | 0.67450800  | 2.14191800  |
| H  | -5.28255200 | 1.21586700  | -0.00039900 |
| O  | 4.27772700  | -1.40755200 | -0.00059700 |
| Se | -0.09422700 | -1.31991000 | 0.00022300  |

**1(SePh)-conformer 3 (acetonitrile)**

Imaginary frequency: 0

G = -2978.023569 hartree

|    |             |             |             |
|----|-------------|-------------|-------------|
| C  | -3.66111600 | 0.93099000  | 0.69410900  |
| C  | -2.67721300 | 1.50759600  | -0.09097800 |
| C  | -1.54970300 | 0.78113300  | -0.46880800 |
| C  | -1.39564700 | -0.53602900 | -0.01961200 |
| C  | -2.38104600 | -1.10912300 | 0.77567900  |
| C  | -3.51479100 | -0.38330600 | 1.11858900  |
| H  | -4.53752200 | 1.50015800  | 0.97308900  |
| H  | -2.77140400 | 2.52703100  | -0.44263300 |
| H  | -2.25553000 | -2.12047600 | 1.13906200  |
| H  | -4.27629900 | -0.84446800 | 1.73385700  |
| C  | -0.56922200 | 1.43615500  | -1.37218500 |
| H  | 0.14070300  | 0.76860900  | -1.88410000 |
| C  | 1.53822300  | -0.44354200 | 0.13056400  |
| C  | 2.75550700  | -0.49843500 | -0.54077200 |
| C  | 1.37131100  | 0.42104700  | 1.20743300  |
| C  | 3.80711400  | 0.30944500  | -0.12814700 |
| H  | 2.88113700  | -1.16152500 | -1.38761100 |
| C  | 2.42228300  | 1.23890400  | 1.60046000  |
| H  | 0.42849700  | 0.45988600  | 1.73843500  |
| C  | 3.64217600  | 1.18356700  | 0.93803800  |
| H  | 4.75260700  | 0.26257800  | -0.65272100 |
| H  | 2.28636200  | 1.91561000  | 2.43415900  |
| Se | 0.13411500  | -1.62247400 | -0.45169400 |
| O  | -0.54935500 | 2.62573300  | -1.57630800 |
| H  | 4.45910800  | 1.82042300  | 1.25028800  |

**1(TePh)-conformer 1 (acetonitrile)**

Imaginary frequency: 0

G = -844.389425 hartree

|   |             |             |             |
|---|-------------|-------------|-------------|
| C | 2.77390600  | 2.81980300  | -0.00007000 |
| C | 3.37495700  | 1.57579100  | -0.00000400 |
| C | 2.60247200  | 0.41211300  | 0.00001600  |
| C | 1.20023300  | 0.48322800  | -0.00005000 |
| C | 0.60648400  | 1.74306700  | -0.00009700 |
| C | 1.38510000  | 2.89310500  | -0.00010900 |
| H | 3.37212300  | 3.72044500  | -0.00006300 |
| H | 4.45528200  | 1.48561100  | 0.00001700  |
| H | -0.47076600 | 1.84027900  | -0.00012900 |
| H | 0.89606300  | 3.85910100  | -0.00014200 |
| C | 3.30853300  | -0.87042200 | 0.00011300  |
| H | 4.40889300  | -0.81184800 | 0.00024300  |
| C | -1.83171000 | -0.25755200 | -0.00003200 |
| C | -2.45300100 | 0.07447200  | -1.20286000 |
| C | -2.45277000 | 0.07466200  | 1.20286900  |
| C | -3.67481100 | 0.73670300  | -1.20233800 |
| H | -1.98137100 | -0.17928700 | -2.14427400 |

|    |             |             |             |
|----|-------------|-------------|-------------|
| C  | -3.67458100 | 0.73690000  | 1.20247500  |
| H  | -1.98097500 | -0.17894900 | 2.14423800  |
| C  | -4.28561200 | 1.06898100  | 0.00010200  |
| H  | -4.14849500 | 0.99245600  | -2.14149400 |
| H  | -4.14809800 | 0.99278300  | 2.14168100  |
| H  | -5.23722100 | 1.58466000  | 0.00014800  |
| O  | 2.75142500  | -1.94847100 | 0.00006400  |
| Te | 0.02976900  | -1.28197300 | -0.00001600 |

**1(TePh)-conformer 2 (acetonitrile)**

Imaginary frequency: 0

G = -844.383606 hartree

|    |             |             |             |
|----|-------------|-------------|-------------|
| C  | 2.73965200  | 2.73895800  | -0.00838200 |
| C  | 3.32754300  | 1.48960800  | 0.00315000  |
| C  | 2.54520800  | 0.33251900  | 0.00420000  |
| C  | 1.14685600  | 0.42576300  | -0.00667300 |
| C  | 0.56259200  | 1.69041400  | -0.01842700 |
| C  | 1.35170600  | 2.83189700  | -0.01905100 |
| H  | 3.34907000  | 3.63233800  | -0.00919100 |
| H  | 4.40430500  | 1.37788000  | 0.01171800  |
| H  | -0.51377400 | 1.79723100  | -0.02740400 |
| H  | 0.87392200  | 3.80341700  | -0.02832000 |
| C  | 3.23960400  | -0.97198300 | 0.01739000  |
| H  | 2.59689700  | -1.87093200 | 0.02053300  |
| C  | -1.92910800 | -0.28370600 | 0.00260600  |
| C  | -2.55180700 | 0.04555800  | -1.19919700 |
| C  | -2.52951700 | 0.05998500  | 1.21175700  |
| C  | -3.76575100 | 0.72137400  | -1.18934400 |
| H  | -2.09022300 | -0.22001500 | -2.14155000 |
| C  | -3.74318900 | 0.73614300  | 1.21632700  |
| H  | -2.05079300 | -0.19490800 | 2.14851300  |
| C  | -4.36068900 | 1.06712500  | 0.01704100  |
| H  | -4.24509000 | 0.97687000  | -2.12545100 |
| H  | -4.20508800 | 1.00299800  | 2.15801800  |
| H  | -5.30638300 | 1.59331600  | 0.02270700  |
| O  | 4.43886400  | -1.10488400 | 0.02503500  |
| Te | -0.08696800 | -1.31463600 | -0.00804300 |

**1(TePh)-conformer 3 (acetonitrile)**

Imaginary frequency: 0

G = -844.383184 hartree

|   |             |             |             |
|---|-------------|-------------|-------------|
| C | -3.73362800 | 1.34285400  | 0.56035500  |
| C | -2.69149700 | 1.80466300  | -0.22424000 |
| C | -1.59309100 | 0.99096100  | -0.50196500 |
| C | -1.52344400 | -0.29592500 | 0.04589700  |
| C | -2.57044300 | -0.74856700 | 0.84435000  |
| C | -3.67480100 | 0.05841400  | 1.08639600  |
| H | -4.58687800 | 1.97672000  | 0.76096100  |
| H | -2.71542400 | 2.79823300  | -0.65347000 |
| H | -2.52155800 | -1.73206300 | 1.29379500  |

|    |             |             |             |
|----|-------------|-------------|-------------|
| H  | -4.48254200 | -0.31466500 | 1.70275100  |
| C  | -0.55285500 | 1.52860300  | -1.41572400 |
| H  | 0.12307900  | 0.78714200  | -1.87025300 |
| C  | 1.62499100  | -0.20449400 | 0.23213400  |
| C  | 2.83897500  | -0.25976100 | -0.44682900 |
| C  | 1.42128400  | 0.76602500  | 1.20963000  |
| C  | 3.84600100  | 0.64837400  | -0.14290300 |
| H  | 3.00174200  | -1.00066100 | -1.21999700 |
| C  | 2.42440400  | 1.68361400  | 1.49404800  |
| H  | 0.48305200  | 0.81294800  | 1.74935500  |
| C  | 3.63916900  | 1.62471200  | 0.82234500  |
| H  | 4.78815900  | 0.59854000  | -0.67345600 |
| H  | 2.25677000  | 2.44071200  | 2.24931500  |
| Te | 0.11725100  | -1.61418200 | -0.23540600 |
| O  | -0.44925900 | 2.69943000  | -1.69102900 |
| H  | 4.42022700  | 2.33830500  | 1.04936800  |

**2(SPh)-conformer 1 (acetonitrile)**

Imaginary frequency: 0

G = -994.015758 hartree

|   |             |             |             |
|---|-------------|-------------|-------------|
| C | -1.97828500 | -3.02386200 | 0.00003900  |
| C | -2.73495300 | -1.86654900 | 0.00020500  |
| C | -2.14995600 | -0.59776300 | 0.00010800  |
| C | -0.74262800 | -0.49321800 | -0.00012600 |
| C | 0.01199100  | -1.66728000 | -0.00029900 |
| C | -0.59555300 | -2.91370800 | -0.00022600 |
| H | -2.45739400 | -3.99329700 | 0.00011700  |
| H | -3.81675500 | -1.93013000 | 0.00040600  |
| H | 1.09082900  | -1.61612000 | -0.00049400 |
| H | 0.02433000  | -3.80107700 | -0.00036600 |
| C | -3.08277300 | 0.53800700  | 0.00023900  |
| H | -4.14270900 | 0.25201400  | 0.00063200  |
| C | 1.75910300  | 0.67503900  | -0.00002500 |
| C | 2.44264600  | 0.53741400  | -1.20482800 |
| C | 2.44243300  | 0.53733600  | 1.20488500  |
| C | 3.80157600  | 0.25247200  | -1.20311800 |
| H | 1.90682600  | 0.65010700  | -2.13887300 |
| C | 3.80136600  | 0.25238200  | 1.20340300  |
| H | 1.90645200  | 0.64996200  | 2.13884500  |
| C | 4.48101800  | 0.10879800  | 0.00020000  |
| H | 4.32929000  | 0.14489000  | -2.14178400 |
| H | 4.32889300  | 0.14474500  | 2.14216700  |
| H | 5.54054300  | -0.11152300 | 0.00026800  |
| N | -2.73693800 | 1.75261600  | -0.00015700 |
| C | -3.78283000 | 2.75367100  | 0.00000400  |
| H | -3.66757800 | 3.39120500  | -0.87781900 |
| H | -4.78934200 | 2.32163700  | 0.00047400  |
| H | -3.66694400 | 3.39162600  | 0.87744600  |
| S | 0.03332500  | 1.10507500  | -0.00016800 |

**2(SPh)-conformer 2 (acetonitrile)**

Imaginary frequency: 0

G = -994.016283 hartree

|   |             |             |             |
|---|-------------|-------------|-------------|
| C | -2.10686100 | 2.76960700  | -0.07467700 |
| C | -2.68076200 | 1.52250400  | -0.22026800 |
| C | -1.94827400 | 0.35474600  | 0.01733900  |
| C | -0.61251100 | 0.46754700  | 0.42246800  |
| C | -0.03918900 | 1.73080700  | 0.57975000  |
| C | -0.77580800 | 2.87209500  | 0.32389600  |
| H | -2.68667900 | 3.66121700  | -0.27277700 |
| H | -3.70979800 | 1.41948800  | -0.53797100 |
| H | 0.98914000  | 1.81182000  | 0.90751600  |
| H | -0.31516800 | 3.84389800  | 0.44482100  |
| C | -2.59314100 | -0.95855000 | -0.19135700 |
| H | -1.92446200 | -1.81523500 | -0.32377900 |
| C | 1.92994600  | -0.60660500 | 0.20375700  |
| C | 3.03706100  | -0.87681200 | 1.00069800  |
| C | 2.10445800  | -0.11389600 | -1.08820500 |
| C | 4.31704800  | -0.66015500 | 0.50362900  |
| H | 2.89688300  | -1.24946200 | 2.00730800  |
| C | 3.38284300  | 0.11928200  | -1.56920700 |
| H | 1.24089100  | 0.08905300  | -1.70915800 |
| C | 4.49285000  | -0.15735600 | -0.77716400 |
| H | 5.17503700  | -0.87383600 | 1.12761300  |
| H | 3.51375900  | 0.50826600  | -2.57066100 |
| H | 5.48934300  | 0.02045200  | -1.15934100 |
| N | -3.84861300 | -1.09134300 | -0.23236600 |
| C | -4.37727200 | -2.41599700 | -0.48273800 |
| H | -4.99291000 | -2.38871800 | -1.38329200 |
| H | -3.59782000 | -3.17542100 | -0.60361800 |
| H | -5.03107900 | -2.70101200 | 0.34287800  |
| S | 0.31942600  | -0.98715000 | 0.84184400  |

**2(SPh)-conformer 3 (acetonitrile)**

Imaginary frequency: 0

G = -994.016716 hartree

|   |             |             |             |
|---|-------------|-------------|-------------|
| C | -3.67535700 | 0.22088800  | 0.85481200  |
| C | -2.65014800 | 1.06805100  | 0.46596300  |
| C | -1.51865900 | 0.57735100  | -0.18247500 |
| C | -1.41801000 | -0.80208100 | -0.41428800 |
| C | -2.44660800 | -1.65127500 | -0.01654900 |
| C | -3.57769100 | -1.14169500 | 0.60462700  |
| H | -4.55077700 | 0.62273300  | 1.34755400  |
| H | -2.71572300 | 2.13354700  | 0.64308800  |
| H | -2.34965400 | -2.71542700 | -0.18736800 |
| H | -4.37308300 | -1.81151200 | 0.90371900  |
| C | -0.46356800 | 1.51442000  | -0.62401900 |
| H | 0.16482300  | 1.18181300  | -1.45720400 |
| C | 1.34853900  | -0.99550000 | -0.25154600 |
| C | 2.57778800  | -0.84647800 | -0.88935600 |

|   |             |             |             |
|---|-------------|-------------|-------------|
| C | 1.24315300  | -0.75867500 | 1.11614700  |
| C | 3.69597900  | -0.46838400 | -0.15903200 |
| H | 2.65519900  | -1.01719500 | -1.95601400 |
| C | 2.36254300  | -0.36335200 | 1.83484100  |
| H | 0.29054400  | -0.87584800 | 1.61696700  |
| C | 3.59182200  | -0.21966100 | 1.20327100  |
| H | 4.64745000  | -0.35503300 | -0.66225200 |
| H | 2.27180500  | -0.17308300 | 2.89648100  |
| S | -0.02512700 | -1.53190200 | -1.23944800 |
| H | 4.46155900  | 0.08700000  | 1.76887600  |
| N | -0.29833000 | 2.64103600  | -0.07921400 |
| C | 0.75097100  | 3.49134300  | -0.60262600 |
| H | 1.45301800  | 3.72255000  | 0.19996900  |
| H | 1.29573300  | 3.03739900  | -1.43712900 |
| H | 0.31491600  | 4.43652200  | -0.92964100 |

**2(SePh)-conformer 1 (acetonitrile)**

Imaginary frequency: 0

G = -2997.406695 hartree

|    |             |             |             |
|----|-------------|-------------|-------------|
| C  | -1.96230200 | -3.21930000 | -0.00006000 |
| C  | -2.75719800 | -2.08770500 | 0.00002300  |
| C  | -2.20792100 | -0.80292400 | 0.00002800  |
| C  | -0.80816900 | -0.65540200 | -0.00004500 |
| C  | -0.01446800 | -1.80084300 | -0.00012900 |
| C  | -0.58311600 | -3.06654700 | -0.00013900 |
| H  | -2.40979100 | -4.20384200 | -0.00007300 |
| H  | -3.83660100 | -2.18463700 | 0.00008700  |
| H  | 1.06262100  | -1.71560500 | -0.00018500 |
| H  | 0.06303800  | -3.93501900 | -0.00020200 |
| C  | -3.15972600 | 0.31512100  | 0.00010800  |
| H  | -4.21777000 | 0.02416800  | 0.00027700  |
| C  | 1.84982900  | 0.56060500  | 0.00002100  |
| C  | 2.52668900  | 0.39047700  | -1.20414100 |
| C  | 2.52654900  | 0.39018400  | 1.20421200  |
| C  | 3.87141800  | 0.04148200  | -1.20278500 |
| H  | 2.00082500  | 0.52580200  | -2.14091500 |
| C  | 3.87127800  | 0.04118400  | 1.20293100  |
| H  | 2.00058300  | 0.52528700  | 2.14096200  |
| C  | 4.54369100  | -0.13440600 | 0.00008900  |
| H  | 4.39299400  | -0.09187200 | -2.14173900 |
| H  | 4.39274200  | -0.09240300 | 2.14191300  |
| H  | 5.59137200  | -0.40578100 | 0.00011900  |
| N  | -2.81271300 | 1.52906500  | -0.00001200 |
| C  | -3.84879600 | 2.53965100  | 0.00007700  |
| H  | -3.72769700 | 3.17582600  | -0.87780700 |
| H  | -4.85819000 | 2.11529800  | 0.00024200  |
| H  | -3.72744100 | 3.17592600  | 0.87785200  |
| Se | -0.00365400 | 1.09746900  | -0.00004600 |



**2(SePh)-conformer 2 (acetonitrile)**

Imaginary frequency: 0

G = -2997.404824 hartree

|    |             |             |             |
|----|-------------|-------------|-------------|
| C  | 2.03906100  | 2.98137300  | -0.11015600 |
| C  | 2.72180800  | 1.79733200  | 0.09106300  |
| C  | 2.06675800  | 0.56394200  | 0.03328300  |
| C  | 0.69303700  | 0.54043000  | -0.23840100 |
| C  | 0.00814400  | 1.73517600  | -0.45199700 |
| C  | 0.67468400  | 2.94697700  | -0.38084700 |
| H  | 2.56134100  | 3.92710500  | -0.05397000 |
| H  | 3.78154600  | 1.79830400  | 0.30946000  |
| H  | -1.04971200 | 1.71958800  | -0.67823300 |
| H  | 0.12663300  | 3.86611000  | -0.54324800 |
| C  | 2.83590100  | -0.67355700 | 0.27821900  |
| H  | 2.25733700  | -1.56787800 | 0.53666600  |
| C  | -2.01349700 | -0.56248300 | 0.00018000  |
| C  | -3.00229000 | -0.66496200 | -0.97078100 |
| C  | -2.32253000 | -0.07520300 | 1.26743200  |
| C  | -4.30519500 | -0.28148600 | -0.67143000 |
| H  | -2.75639500 | -1.03610700 | -1.95712300 |
| C  | -3.61987800 | 0.32243300  | 1.55392600  |
| H  | -1.55000100 | -0.00356100 | 2.02264100  |
| C  | -4.61352400 | 0.21589600  | 0.58641900  |
| H  | -5.07443400 | -0.36420300 | -1.42812400 |
| H  | -3.85734500 | 0.70726100  | 2.53718000  |
| H  | -5.62627600 | 0.52061300  | 0.81542800  |
| N  | 4.09645100  | -0.71014700 | 0.21270500  |
| C  | 4.75132100  | -1.96811300 | 0.50476100  |
| H  | 5.43559300  | -1.82633700 | 1.34282800  |
| H  | 4.04998200  | -2.77352600 | 0.74616000  |
| H  | 5.35501600  | -2.26346100 | -0.35463000 |
| Se | -0.22974200 | -1.14704100 | -0.40394100 |

**2(SePh)-conformer 3 (acetonitrile)**

Imaginary frequency: 0

G = -2997.406131 hartree

|   |             |             |             |
|---|-------------|-------------|-------------|
| C | -3.64586400 | 0.90570400  | 0.92091900  |
| C | -2.55371300 | 1.55496000  | 0.36941700  |
| C | -1.49008900 | 0.83758400  | -0.17754200 |
| C | -1.52970800 | -0.56185100 | -0.13567200 |
| C | -2.62420300 | -1.21276600 | 0.42529200  |
| C | -3.68596600 | -0.48260600 | 0.94023800  |
| H | -4.46616900 | 1.48017300  | 1.33052600  |
| H | -2.51138500 | 2.63579200  | 0.33557100  |
| H | -2.63755100 | -2.29392000 | 0.47023800  |
| H | -4.53472300 | -0.99973700 | 1.36821900  |
| C | -0.36691900 | 1.56949700  | -0.80239700 |
| H | 0.18360400  | 1.03752500  | -1.58603900 |
| C | 1.37621600  | -0.86034200 | 0.09229900  |
| C | 2.58748800  | -0.73734400 | -0.57972400 |

|    |             |             |             |
|----|-------------|-------------|-------------|
| C  | 1.25978600  | -0.42730400 | 1.40899300  |
| C  | 3.68459600  | -0.18570500 | 0.07063100  |
| H  | 2.67262200  | -1.05919900 | -1.61017200 |
| C  | 2.35477200  | 0.14055100  | 2.04522400  |
| H  | 0.31720200  | -0.52423900 | 1.93340300  |
| C  | 3.56976500  | 0.25969700  | 1.38043600  |
| H  | 4.62555700  | -0.09204200 | -0.45594600 |
| H  | 2.25823200  | 0.48476400  | 3.06687400  |
| Se | -0.10946700 | -1.65830800 | -0.83310700 |
| H  | 4.42159200  | 0.70048600  | 1.88121300  |
| N  | -0.06274200 | 2.74647600  | -0.46298300 |
| C  | 1.03943600  | 3.38057000  | -1.15691700 |
| H  | 1.79670600  | 3.67280500  | -0.42781200 |
| H  | 1.49895800  | 2.73569600  | -1.91349000 |
| H  | 0.68284500  | 4.29516400  | -1.63327400 |

**2(TePh)-conformer 1 (acetonitrile)**

Imaginary frequency: 0

G = -863.771498 hartree

|    |             |              |              |
|----|-------------|--------------|--------------|
| C  | 3.21458500  | -0.084131000 | 0.000157000  |
| H  | 4.28041800  | 0.170504000  | 0.000393000  |
| N  | 2.81629900  | -1.283271000 | 0.000017000  |
| C  | 3.78590500  | -2.356782000 | 0.000183000  |
| H  | 3.62648200  | -2.983000000 | -0.878427000 |
| H  | 4.81702100  | -1.991433000 | 0.000451000  |
| H  | 3.62614200  | -2.983086000 | 0.878677000  |
| Te | 0.06442700  | -1.120859000 | -0.000018000 |
| C  | -1.96432900 | -0.44234500  | 0.000088000  |
| C  | -2.64125700 | -0.23299200  | -1.200746000 |
| C  | -2.64094200 | -0.23203300  | 1.200935000  |
| C  | -3.96657100 | 0.18658000   | -1.201808000 |
| H  | -2.13119200 | -0.39259200  | -2.143290000 |
| C  | -3.96624800 | 0.18752600   | 1.202012000  |
| H  | -2.13060900 | -0.39088900  | 2.143462000  |
| C  | -4.62997000 | 0.39829100   | 0.000102000  |
| H  | -4.47995800 | 0.34770500   | -2.141320000 |
| H  | -4.47940100 | 0.34939300   | 2.141523000  |
| H  | -5.66188100 | 0.72507800   | 0.000122000  |
| C  | 2.27037900  | 1.03553600   | 0.000004000  |
| C  | 2.79110900  | 2.33124800   | -0.000057000 |
| C  | 0.87959800  | 0.83894800   | -0.000094000 |
| C  | 1.95812200  | 3.43560400   | -0.000218000 |
| H  | 3.86747600  | 2.45925800   | 0.000024000  |
| C  | 0.05027200  | 1.95847300   | -0.000232000 |
| C  | 0.58264000  | 3.24109900   | -0.000298000 |
| H  | 2.37294900  | 4.43451900   | -0.000274000 |
| H  | -1.02475200 | 1.83995800   | -0.000295000 |
| H  | -0.08677500 | 4.09198900   | -0.000406000 |

**2(TePh)-conformer 2 (acetonitrile)**

Imaginary frequency: 0

G = -863.764526 hartree

|    |             |             |             |
|----|-------------|-------------|-------------|
| C  | 2.04696800  | 3.19496700  | -0.06702100 |
| C  | 2.79771900  | 2.03911400  | 0.03742300  |
| C  | 2.18932800  | 0.78132200  | 0.04240000  |
| C  | 0.79464100  | 0.69486700  | -0.05868100 |
| C  | 0.04283400  | 1.86297100  | -0.16949600 |
| C  | 0.66346500  | 3.10316400  | -0.17017900 |
| H  | 2.53259500  | 4.16174200  | -0.06540800 |
| H  | 3.87557600  | 2.08343200  | 0.12308400  |
| H  | -1.03453200 | 1.81338800  | -0.25738400 |
| H  | 0.06157900  | 3.99920500  | -0.25254800 |
| C  | 3.03197800  | -0.42610700 | 0.16211500  |
| H  | 2.51823600  | -1.36598000 | 0.40464200  |
| C  | -2.14911200 | -0.44658500 | 0.02631100  |
| C  | -2.91133800 | -0.29167400 | -1.12892100 |
| C  | -2.69232400 | -0.10836200 | 1.26407600  |
| C  | -4.20820400 | 0.20149700  | -1.04541800 |
| H  | -2.49421300 | -0.54952000 | -2.09383300 |
| C  | -3.98648700 | 0.38972500  | 1.34226800  |
| H  | -2.10611900 | -0.22947900 | 2.16609300  |
| C  | -4.74492700 | 0.54383300  | 0.18841400  |
| H  | -4.79588200 | 0.32014600  | -1.94652200 |
| H  | -4.40237000 | 0.65406300  | 2.30591900  |
| H  | -5.75410100 | 0.92966000  | 0.25159600  |
| N  | 4.28481000  | -0.40522900 | 0.01299800  |
| C  | 5.00887400  | -1.64819600 | 0.17575000  |
| H  | 5.74369300  | -1.52941600 | 0.97351900  |
| H  | 4.35909200  | -2.49800400 | 0.40943000  |
| H  | 5.56218900  | -1.86060500 | -0.74012800 |
| Te | -0.17999800 | -1.20067800 | -0.09545600 |

**2(TePh)-conformer 3 (acetonitrile)**

Imaginary frequency: 0

G = -863.764721 hartree

|   |             |             |             |
|---|-------------|-------------|-------------|
| C | -3.55708600 | 1.65170600  | 0.79998600  |
| C | -2.39340600 | 2.06611000  | 0.17459600  |
| C | -1.43119300 | 1.14405800  | -0.24050300 |
| C | -1.64309000 | -0.21839200 | 0.00853900  |
| C | -2.81192500 | -0.62863300 | 0.64667200  |
| C | -3.77179000 | 0.29832700  | 1.02817300  |
| H | -4.29669600 | 2.38025600  | 1.10510400  |
| H | -2.21415600 | 3.11542700  | -0.02090200 |
| H | -2.96925400 | -1.67807700 | 0.86124500  |
| H | -4.67786400 | -0.03720600 | 1.51584600  |
| C | -0.22970700 | 1.63375800  | -0.95192000 |
| H | 0.22898800  | 0.93859100  | -1.66460300 |
| C | 1.43883200  | -0.70583300 | 0.31481300  |
| C | 2.61403300  | -0.59738700 | -0.42267500 |

|    |             |             |             |
|----|-------------|-------------|-------------|
| C  | 1.35820000  | -0.12619900 | 1.57805100  |
| C  | 3.70573900  | 0.08244100  | 0.10562400  |
| H  | 2.67906400  | -1.02837100 | -1.41426100 |
| C  | 2.44382800  | 0.57003300  | 2.09231200  |
| H  | 0.44674400  | -0.20637000 | 2.15822700  |
| C  | 3.62038200  | 0.67239400  | 1.35926600  |
| H  | 4.61726400  | 0.16241800  | -0.47278400 |
| H  | 2.37146900  | 1.02770200  | 3.07061200  |
| Te | -0.23069500 | -1.71854900 | -0.50275900 |
| H  | 4.46634600  | 1.21244100  | 1.76392700  |
| N  | 0.24114000  | 2.78955000  | -0.76397400 |
| C  | 1.40858900  | 3.17012800  | -1.53304400 |
| H  | 2.21278700  | 3.44074900  | -0.84708500 |
| H  | 1.75967300  | 2.37646500  | -2.20138300 |
| H  | 1.17533900  | 4.05861900  | -2.12198000 |

**1(SMe)-conformer 1 (acetonitrile)**

Imaginary frequency: 0

G = -782.952923 hartree

|   |             |             |             |
|---|-------------|-------------|-------------|
| C | 2.63265800  | -0.88127800 | 0.00011900  |
| C | 2.20810100  | 0.43379300  | 0.00008500  |
| C | 0.85162800  | 0.76109000  | -0.00005700 |
| C | -0.12437900 | -0.26034900 | -0.00008500 |
| C | 0.31951700  | -1.58429400 | -0.00011700 |
| C | 1.67382100  | -1.88546200 | -0.00001200 |
| H | 3.68642700  | -1.12212400 | 0.00026100  |
| H | 2.93190300  | 1.24063600  | 0.00016600  |
| H | -0.38630800 | -2.40012600 | -0.00029500 |
| H | 1.97737300  | -2.92459700 | 0.00000300  |
| C | 0.53063500  | 2.19411800  | -0.00021900 |
| H | 1.41510700  | 2.85526900  | -0.00051500 |
| S | -1.83236200 | 0.15280900  | -0.00012500 |
| O | -0.58309800 | 2.66639300  | 0.00028100  |
| C | -2.62435300 | -1.46319300 | 0.00016800  |
| H | -2.37862000 | -2.03184000 | 0.89480500  |
| H | -3.69092800 | -1.24732400 | -0.00013000 |
| H | -2.37814300 | -2.03254500 | -0.89383300 |

**1(SMe)-conformer 2 (acetonitrile)**

Imaginary frequency: 0

G = -782.951868 hartree

|   |             |             |             |
|---|-------------|-------------|-------------|
| C | -1.81195500 | 1.92106000  | 0.00016700  |
| C | -2.01668500 | 0.55481100  | 0.00022200  |
| C | -0.94271400 | -0.33403800 | 0.00005000  |
| C | 0.37850000  | 0.15443800  | -0.00016000 |
| C | 0.57438700  | 1.53606200  | -0.00028300 |
| C | -0.50812800 | 2.40291700  | -0.00010500 |
| H | -2.65048500 | 2.60360300  | 0.00036700  |
| H | -3.01658900 | 0.14027100  | 0.00032400  |
| H | 1.57063000  | 1.95121100  | -0.00058100 |

|   |             |             |             |
|---|-------------|-------------|-------------|
| H | -0.32471200 | 3.46979200  | -0.00024500 |
| C | -1.23860600 | -1.78202600 | -0.00003200 |
| H | -0.37241000 | -2.46277000 | -0.00003800 |
| S | 1.72433200  | -0.98647400 | 0.00000200  |
| O | -2.35757100 | -2.23948200 | -0.00011900 |
| C | 3.17032500  | 0.08057500  | 0.00018500  |
| H | 3.20719500  | 0.69750100  | 0.89532800  |
| H | 4.01897700  | -0.60012500 | 0.00063800  |
| H | 3.20790600  | 0.69716100  | -0.89513800 |

**1(SMe)-conformer 3 (acetonitrile)**

Imaginary frequency: 0

G = -782.949845 hartree

|   |             |             |             |
|---|-------------|-------------|-------------|
| C | 2.63207700  | -0.42282000 | 0.25489200  |
| C | 1.86449800  | 0.72334200  | 0.14618300  |
| C | 0.49665000  | 0.64215700  | -0.10939500 |
| C | -0.11593400 | -0.61335200 | -0.23154400 |
| C | 0.66370800  | -1.76083500 | -0.12185100 |
| C | 2.02889800  | -1.66659000 | 0.11130100  |
| H | 3.69437400  | -0.35064600 | 0.44542200  |
| H | 2.31184100  | 1.70453100  | 0.24035400  |
| H | 0.19129500  | -2.73000000 | -0.21160700 |
| H | 2.62024700  | -2.56949900 | 0.19089300  |
| C | -0.25927600 | 1.90577600  | -0.28837000 |
| H | -1.27863000 | 1.80469400  | -0.69202700 |
| S | -1.85897400 | -0.80816600 | -0.53385100 |
| O | 0.19770700  | 2.99580300  | -0.03976200 |
| C | -2.53094700 | -0.22909400 | 1.04435700  |
| H | -2.32213600 | 0.82732800  | 1.20144000  |
| H | -3.60792600 | -0.37542100 | 0.98858400  |
| H | -2.12518600 | -0.81826500 | 1.86320600  |

**1(SeMe)-conformer 1 (acetonitrile)**

Imaginary frequency: 0

G = -2786.344590 hartree

|    |             |             |             |
|----|-------------|-------------|-------------|
| C  | 3.03986800  | -0.86580200 | -0.00008300 |
| C  | 2.60446000  | 0.44571300  | -0.00006800 |
| C  | 1.24335100  | 0.75583100  | -0.00001100 |
| C  | 0.28210400  | -0.27345900 | 0.00001400  |
| C  | 0.73373400  | -1.59204800 | 0.00009800  |
| C  | 2.09160000  | -1.88067300 | 0.00003200  |
| H  | 4.09594400  | -1.09682700 | -0.00017700 |
| H  | 3.32002500  | 1.25994000  | -0.00006800 |
| H  | 0.03428200  | -2.41408800 | 0.00025400  |
| H  | 2.40668700  | -2.91639300 | 0.00011500  |
| C  | 0.89526400  | 2.18179900  | 0.00010100  |
| H  | 1.76095300  | 2.86637100  | 0.00027400  |
| Se | -1.58429300 | 0.13754800  | -0.00006000 |
| O  | -0.23225800 | 2.62179300  | 0.00005800  |
| C  | -2.30539900 | -1.67033900 | 0.00004700  |

|   |             |             |             |
|---|-------------|-------------|-------------|
| H | -2.00936400 | -2.21006900 | 0.89565200  |
| H | -3.38478600 | -1.53585400 | 0.00032300  |
| H | -2.00962000 | -2.21016900 | -0.89556300 |

**1(SeMe)-conformer 2 (acetonitrile)**

Imaginary frequency: 0

G = -2786.342685 hartree

|    |             |             |             |
|----|-------------|-------------|-------------|
| C  | -2.55963600 | 1.64977400  | -0.00002700 |
| C  | -2.49607400 | 0.26980700  | -0.00003200 |
| C  | -1.26807000 | -0.39216200 | -0.00000800 |
| C  | -0.07192300 | 0.34433300  | 0.00001500  |
| C  | -0.14476000 | 1.73570400  | 0.00003800  |
| C  | -1.37502400 | 2.37714000  | 0.00001800  |
| H  | -3.51504700 | 2.15609800  | -0.00005500 |
| H  | -3.39651100 | -0.33094400 | -0.00005200 |
| H  | 0.75222500  | 2.33670300  | 0.00007400  |
| H  | -1.40300900 | 3.45934800  | 0.00004100  |
| C  | -1.27640900 | -1.87044500 | 0.00002700  |
| H  | -0.29269700 | -2.36890300 | 0.00006900  |
| Se | 1.62176900  | -0.56085600 | -0.00001100 |
| O  | -2.28231000 | -2.53916000 | 0.00001700  |
| C  | 2.82281400  | 0.96491300  | -0.00001000 |
| H  | 2.68387400  | 1.56170400  | 0.89680900  |
| H  | 3.82019100  | 0.53223100  | -0.00005200 |
| H  | 2.68379600  | 1.56176200  | -0.89675900 |

**1(SeMe)-conformer 3 (acetonitrile)**

Imaginary frequency: 0

G = -2786.340790 hartree

|    |             |             |             |
|----|-------------|-------------|-------------|
| C  | 2.94531300  | -0.82534000 | 0.22085900  |
| C  | 2.39716400  | 0.43790900  | 0.09090700  |
| C  | 1.02503300  | 0.60350600  | -0.09847800 |
| C  | 0.18757500  | -0.51882400 | -0.12868300 |
| C  | 0.74555500  | -1.78630700 | 0.00418300  |
| C  | 2.11583700  | -1.93923700 | 0.16779900  |
| H  | 4.01147500  | -0.94495300 | 0.35873300  |
| H  | 3.02146000  | 1.32191800  | 0.11632300  |
| H  | 0.10222600  | -2.65597500 | -0.01005900 |
| H  | 2.53343700  | -2.93293100 | 0.26545000  |
| C  | 0.51392900  | 1.98045200  | -0.30701400 |
| H  | -0.52050500 | 2.05946800  | -0.67662600 |
| Se | -1.72606500 | -0.39929000 | -0.34277500 |
| O  | 1.17576200  | 2.97271700  | -0.11811700 |
| C  | -2.13042500 | 0.52802700  | 1.32869200  |
| H  | -1.73130300 | 1.53860800  | 1.31515600  |
| H  | -3.21478900 | 0.56392900  | 1.39974200  |
| H  | -1.72177000 | -0.03703200 | 2.16096100  |

**1(TeMe)-conformer 1 (acetonitrile)**

Imaginary frequency: 0

G = -652.708930 hartree

|    |             |             |             |
|----|-------------|-------------|-------------|
| C  | 3.39682700  | -0.84121000 | -0.00004200 |
| C  | 2.95089500  | 0.46669600  | 0.00006900  |
| C  | 1.58449900  | 0.75481000  | 0.00000800  |
| C  | 0.63302600  | -0.27942000 | 0.00025100  |
| C  | 1.09763800  | -1.59334800 | 0.00018100  |
| C  | 2.45910900  | -1.86766400 | 0.00008600  |
| H  | 4.45508900  | -1.06275000 | -0.00028100 |
| H  | 3.65757700  | 1.28884200  | -0.00004100 |
| H  | 0.40519600  | -2.42291300 | 0.00019400  |
| H  | 2.78790300  | -2.89923600 | 0.00002600  |
| C  | 1.19415000  | 2.16648300  | -0.00039200 |
| H  | 2.02576200  | 2.89009800  | -0.00117600 |
| Te | -1.43538500 | 0.13698400  | 0.00013800  |
| O  | 0.04449000  | 2.55336500  | -0.00007400 |
| C  | -2.06043800 | -1.91008900 | -0.00063200 |
| H  | -1.71712200 | -2.42238700 | 0.89414800  |
| H  | -3.14836300 | -1.87763900 | -0.00116100 |
| H  | -1.71619700 | -2.42162700 | -0.89548700 |

**1(TeMe)-conformer 2 (acetonitrile)**

Imaginary frequency: 0

G = -652.703443 hartree

|    |             |             |             |
|----|-------------|-------------|-------------|
| C  | 3.03867500  | -1.52287800 | 0.00011000  |
| C  | 2.87456700  | -0.15147000 | 0.00019900  |
| C  | 1.59859900  | 0.41529000  | 0.00003100  |
| C  | 0.45951200  | -0.40320200 | -0.00016200 |
| C  | 0.63718700  | -1.78571400 | -0.00032600 |
| C  | 1.91100000  | -2.33674600 | -0.00017800 |
| H  | 4.02888100  | -1.95758400 | 0.00024800  |
| H  | 3.72888600  | 0.51345300  | 0.00033200  |
| H  | -0.21344700 | -2.45223400 | -0.00062200 |
| H  | 2.01992600  | -3.41391300 | -0.00032800 |
| C  | 1.49713500  | 1.88968400  | 0.00001400  |
| H  | 0.47610500  | 2.31179100  | -0.00024200 |
| Te | -1.50466400 | 0.40793600  | -0.00010600 |
| O  | 2.44465900  | 2.63729800  | 0.00021000  |
| C  | -2.54142800 | -1.45289400 | 0.00066500  |
| H  | -2.30451200 | -2.01717700 | 0.89758600  |
| H  | -3.59689100 | -1.19017400 | 0.00090700  |
| H  | -2.30517700 | -2.01764500 | -0.89614100 |

**1(TeMe)-conformer 3 (acetonitrile)**

Imaginary frequency: 0

G = -652.702860 hartree

|   |            |             |             |
|---|------------|-------------|-------------|
| C | 3.28987000 | -0.90707400 | 0.21743400  |
| C | 2.78767500 | 0.36986200  | 0.04769400  |
| C | 1.41722700 | 0.58059900  | -0.11514400 |
| C | 0.53098400 | -0.50334100 | -0.07437300 |
| C | 1.04765200 | -1.78525000 | 0.10325800  |

|    |             |             |             |
|----|-------------|-------------|-------------|
| C  | 2.41508300  | -1.98728600 | 0.23450000  |
| H  | 4.35394800  | -1.06391000 | 0.33263000  |
| H  | 3.44613200  | 1.22879700  | 0.01971400  |
| H  | 0.37748100  | -2.63364800 | 0.15218900  |
| H  | 2.79554200  | -2.99230700 | 0.36450600  |
| C  | 0.96211200  | 1.96749900  | -0.37632200 |
| H  | -0.06425500 | 2.07094300  | -0.76490100 |
| Te | -1.58265800 | -0.31609400 | -0.23386900 |
| O  | 1.65521000  | 2.94303100  | -0.21529900 |
| C  | -1.82075900 | 1.02696200  | 1.41544800  |
| H  | -1.47951600 | 2.02440800  | 1.15531300  |
| H  | -2.88359100 | 1.04953900  | 1.64421000  |
| H  | -1.26827800 | 0.63698800  | 2.26494800  |

**2(SMe)-conformer 1 (acetonitrile)**

Imaginary frequency: 0

G = -802.331534 hartree

|   |             |             |             |
|---|-------------|-------------|-------------|
| C | -1.97789500 | -2.24372100 | 0.00017000  |
| C | -0.59546300 | -2.19195600 | 0.00053000  |
| C | 0.10224900  | -0.98253000 | 0.00023900  |
| C | -0.62300700 | 0.23091300  | -0.00021400 |
| C | -2.01843300 | 0.16444900  | -0.00065100 |
| C | -2.68567900 | -1.05166400 | -0.00047700 |
| H | -2.49223600 | -3.19489800 | 0.00035700  |
| H | -0.02288500 | -3.11207900 | 0.00106500  |
| H | -2.60844600 | 1.06743400  | -0.00120400 |
| H | -3.76815100 | -1.05757200 | -0.00085200 |
| C | 1.56763800  | -1.09143000 | 0.00034500  |
| H | 1.94246300  | -2.12346800 | 0.00157600  |
| S | 0.22156000  | 1.77925900  | -0.00020700 |
| C | -1.13566900 | 2.96342700  | 0.00084500  |
| H | -1.75057500 | 2.87637900  | 0.89456000  |
| H | -0.64876000 | 3.93690800  | 0.00165400  |
| H | -1.75054800 | 2.87799400  | -0.89308500 |
| N | 2.36519100  | -0.11180000 | -0.00071600 |
| C | 3.78427600  | -0.39847400 | -0.00013100 |
| H | 4.24192900  | 0.06119700  | 0.87725200  |
| H | 4.00532000  | -1.47137800 | 0.00095800  |
| H | 4.24247900  | 0.05985000  | -0.87788900 |

**2(SMe)-conformer 2 (acetonitrile)**

Imaginary frequency: 0

G = -802.332674 hartree

|   |             |            |             |
|---|-------------|------------|-------------|
| C | 0.30307200  | 2.76549200 | -0.00611400 |
| C | -0.74527800 | 1.86315800 | -0.04062100 |
| C | -0.51923200 | 0.48789400 | -0.04190700 |
| C | 0.80353700  | 0.00789400 | -0.00685900 |
| C | 1.85599300  | 0.92310900 | 0.02698200  |
| C | 1.60634100  | 2.28727900 | 0.02592900  |
| H | 0.10840400  | 3.82945500 | -0.00953400 |

|   |             |             |             |
|---|-------------|-------------|-------------|
| H | -1.77060300 | 2.20724900  | -0.07350600 |
| H | 2.88010900  | 0.58275300  | 0.05756800  |
| H | 2.44053700  | 2.97665500  | 0.04986700  |
| C | -1.66943100 | -0.43796100 | -0.09391200 |
| H | -1.45252300 | -1.48367500 | -0.33881200 |
| S | 1.07413200  | -1.73903300 | 0.01988900  |
| C | 2.86537100  | -1.88040400 | -0.00827700 |
| H | 3.31269700  | -1.44794100 | 0.88408500  |
| H | 3.06381700  | -2.94995600 | -0.02328500 |
| H | 3.28345600  | -1.42700700 | -0.90456700 |
| N | -2.85564000 | -0.05895700 | 0.11827800  |
| C | -3.90882200 | -1.04700500 | 0.01616400  |
| H | -3.53944100 | -2.04695800 | -0.23430500 |
| H | -4.44926700 | -1.09136100 | 0.96294000  |
| H | -4.62312500 | -0.72872800 | -0.74492400 |

**2(SMe)-conformer 3 (acetonitrile)**

Imaginary frequency: 0

G = -802.331100 hartree

|   |             |             |             |
|---|-------------|-------------|-------------|
| C | 1.71201700  | -2.26952700 | 0.23522600  |
| C | 0.37220900  | -1.93770500 | 0.13070000  |
| C | -0.02685000 | -0.62320300 | -0.11224900 |
| C | 0.95253400  | 0.37432700  | -0.22711900 |
| C | 2.29932900  | 0.03290500  | -0.12233100 |
| C | 2.68027800  | -1.28189800 | 0.09905400  |
| H | 2.00268600  | -3.29625800 | 0.41467600  |
| H | -0.39441400 | -2.69635100 | 0.21835700  |
| H | 3.04683500  | 0.81083000  | -0.20654600 |
| H | 3.73054900  | -1.53181300 | 0.17384100  |
| C | -1.46382100 | -0.31791600 | -0.27847900 |
| H | -1.70169500 | 0.61307900  | -0.80481700 |
| S | 0.54545700  | 2.08154200  | -0.51606700 |
| C | -0.29588400 | 2.49223100  | 1.03291400  |
| H | 0.36515100  | 2.31175700  | 1.87732800  |
| H | -0.53661600 | 3.55228600  | 0.97899200  |
| H | -1.21568900 | 1.92173400  | 1.14704000  |
| N | -2.36946300 | -1.09012700 | 0.14370300  |
| C | -3.74525400 | -0.71192600 | -0.10373200 |
| H | -3.84084000 | 0.23785400  | -0.64017800 |
| H | -4.23243100 | -1.49969000 | -0.68056000 |
| H | -4.27195500 | -0.64093400 | 0.84910300  |

**2(SeMe)-conformer 1 (acetonitrile)**

Imaginary frequency: 0

G = -2805.724178 hartree

|   |            |             |             |
|---|------------|-------------|-------------|
| C | 2.68495700 | 1.91765000  | -0.00009400 |
| C | 1.34756700 | 2.27086600  | -0.00026700 |
| C | 0.33207300 | 1.31192400  | -0.00012900 |
| C | 0.67570300 | -0.05484600 | 0.00012300  |
| C | 2.02700100 | -0.39962600 | 0.00036800  |

|    |             |             |             |
|----|-------------|-------------|-------------|
| C  | 3.01860200  | 0.57130300  | 0.00026100  |
| H  | 3.45352600  | 2.67844700  | -0.00022100 |
| H  | 1.06562800  | 3.31738000  | -0.00051400 |
| H  | 2.32827000  | -1.43591100 | 0.00065100  |
| H  | 4.05685600  | 0.26504900  | 0.00045900  |
| C  | -1.04401200 | 1.82469400  | -0.00023400 |
| H  | -1.12776800 | 2.91900400  | -0.00064400 |
| Se | -0.67425100 | -1.41692200 | 0.00003100  |
| C  | 0.47059800  | -2.99525500 | -0.00037500 |
| H  | 1.08586900  | -3.03878900 | 0.89466600  |
| H  | -0.22245300 | -3.83399700 | -0.00061100 |
| H  | 1.08589300  | -3.03818500 | -0.89542600 |
| N  | -2.07141600 | 1.09035200  | 0.00017400  |
| C  | -3.36893300 | 1.73192600  | 0.00013800  |
| H  | -3.92882100 | 1.40697600  | 0.87829100  |
| H  | -3.30451100 | 2.82513400  | -0.00041400 |
| H  | -3.92937200 | 1.40596400  | -0.87725000 |

**2(SeMe)-conformer 2 (acetonitrile)**

Imaginary frequency: 0

G = -2805.722910 hartree

|    |             |             |             |
|----|-------------|-------------|-------------|
| C  | -0.77255100 | 3.01109000  | -0.00604100 |
| C  | -1.53217900 | 1.85584500  | -0.04778700 |
| C  | -0.93394800 | 0.59562000  | -0.04889800 |
| C  | 0.46632900  | 0.50248500  | -0.00853700 |
| C  | 1.22750300  | 1.66859100  | 0.03501900  |
| C  | 0.61241400  | 2.91194700  | 0.03433500  |
| H  | -1.25290100 | 3.98030900  | -0.00985400 |
| H  | -2.61248600 | 1.90408000  | -0.08696000 |
| H  | 2.30594100  | 1.62262900  | 0.07284500  |
| H  | 1.22343800  | 3.80491800  | 0.06501800  |
| C  | -1.78560400 | -0.61033100 | -0.10482100 |
| H  | -1.29155000 | -1.55339200 | -0.36743400 |
| Se | 1.29818600  | -1.23010300 | 0.01993000  |
| C  | 3.16944100  | -0.71335000 | -0.03835600 |
| H  | 3.44471500  | -0.16127100 | 0.85569900  |
| H  | 3.71857900  | -1.65102700 | -0.07137900 |
| H  | 3.37697200  | -0.13659000 | -0.93534600 |
| N  | -3.02730100 | -0.57669200 | 0.12167800  |
| C  | -3.76856200 | -1.81560800 | 0.01407700  |
| H  | -3.14053700 | -2.67218900 | -0.25207100 |
| H  | -4.26594300 | -2.01686300 | 0.96400300  |
| H  | -4.55052200 | -1.69798400 | -0.73783400 |

**2(SeMe)-conformer 3 (acetonitrile)**

Imaginary frequency: 0

G = -2805.722202 hartree

|   |            |            |             |
|---|------------|------------|-------------|
| C | 0.03620400 | 3.14956000 | 0.19583100  |
| C | 0.99006100 | 2.15388500 | 0.07670600  |
| C | 0.62041700 | 0.81903600 | -0.09780500 |

|    |             |             |             |
|----|-------------|-------------|-------------|
| C  | -0.74132300 | 0.49123100  | -0.12678600 |
| C  | -1.69729000 | 1.49687200  | -0.00513600 |
| C  | -1.31317300 | 2.82109400  | 0.14560500  |
| H  | 0.34210400  | 4.17994700  | 0.32073100  |
| H  | 2.04528100  | 2.39292400  | 0.09903500  |
| H  | -2.74740200 | 1.23611100  | -0.01771200 |
| H  | -2.06751500 | 3.59210400  | 0.23371800  |
| C  | 1.67308800  | -0.20315600 | -0.28140500 |
| H  | 1.36904700  | -1.12182700 | -0.79591900 |
| Se | -1.37097600 | -1.31935400 | -0.32675900 |
| C  | -0.59083100 | -2.07216700 | 1.29824200  |
| H  | -0.92121200 | -1.49443700 | 2.15630900  |
| H  | -0.96313100 | -3.09121200 | 1.37017800  |
| H  | 0.49393900  | -2.08111800 | 1.23460700  |
| N  | 2.85935300  | -0.02704900 | 0.11346800  |
| C  | 3.81898900  | -1.07953600 | -0.14918600 |
| H  | 3.38298000  | -1.94047200 | -0.66661500 |
| H  | 4.63447800  | -0.67537900 | -0.75110100 |
| H  | 4.25230400  | -1.41017200 | 0.79588700  |

2(TeMe)-conformer 1 (acetonitrile)

Imaginary frequency: 0

G = -672.089842 hartree

|    |             |             |             |
|----|-------------|-------------|-------------|
| C  | 3.56551900  | -0.48711000 | 0.00007400  |
| C  | 2.89337700  | 0.72217400  | 0.00028000  |
| C  | 1.49813600  | 0.77470400  | 0.00013900  |
| C  | 0.75140400  | -0.41646700 | -0.00014200 |
| C  | 1.44098000  | -1.62801100 | -0.00038100 |
| C  | 2.82930900  | -1.66443500 | -0.00028800 |
| H  | 4.64682600  | -0.51310600 | 0.00018200  |
| H  | 3.44822000  | 1.65344700  | 0.00055800  |
| H  | 0.90309200  | -2.56505200 | -0.00066800 |
| H  | 3.33388200  | -2.62229500 | -0.00048100 |
| C  | 0.87006100  | 2.09866900  | 0.00030500  |
| H  | 1.54969700  | 2.95880000  | 0.00088000  |
| Te | -1.36365700 | -0.39306200 | -0.00006800 |
| C  | -1.58057400 | -2.53280700 | 0.00056600  |
| H  | -1.14738100 | -2.97506700 | 0.89432200  |
| H  | -2.65539100 | -2.70859500 | 0.00096200  |
| H  | -1.14800200 | -2.97554200 | -0.89325800 |
| N  | -0.38484800 | 2.24546500  | -0.00022000 |
| C  | -0.93769600 | 3.58247000  | -0.00008800 |
| H  | -1.57257500 | 3.70736100  | 0.87798700  |
| H  | -0.16565200 | 4.35800500  | 0.00050400  |
| H  | -1.57172700 | 3.70789600  | -0.87870500 |

2(TeMe)-conformer 2 (acetonitrile)

Imaginary frequency: 0

G = -672.083981 hartree

|   |             |            |             |
|---|-------------|------------|-------------|
| C | -1.77412100 | 2.91622100 | -0.00301400 |
|---|-------------|------------|-------------|

|    |             |             |             |
|----|-------------|-------------|-------------|
| C  | -2.24094000 | 1.61519700  | -0.04241700 |
| C  | -1.35993500 | 0.53187800  | -0.04585600 |
| C  | 0.02184900  | 0.76837400  | -0.01048800 |
| C  | 0.48483800  | 2.08251900  | 0.03298400  |
| C  | -0.40428700 | 3.14743300  | 0.03440400  |
| H  | -2.46958100 | 3.74494000  | -0.00477400 |
| H  | -3.30257800 | 1.40824400  | -0.07620300 |
| H  | 1.54470400  | 2.29271400  | 0.06795700  |
| H  | -0.02174700 | 4.15970300  | 0.06417200  |
| C  | -1.90498000 | -0.84048500 | -0.09346600 |
| H  | -1.19562600 | -1.64710400 | -0.32133600 |
| Te | 1.40746800  | -0.84156500 | 0.01306300  |
| C  | 3.17746400  | 0.34417400  | -0.04191000 |
| H  | 3.25627400  | 0.95141200  | 0.85475800  |
| H  | 3.99964100  | -0.36708900 | -0.07604500 |
| H  | 3.18875500  | 0.95980200  | -0.93658200 |
| N  | -3.12408100 | -1.10164700 | 0.10182300  |
| C  | -3.54582700 | -2.48357600 | 0.01231300  |
| H  | -2.72446300 | -3.17130900 | -0.21448300 |
| H  | -4.00871000 | -2.77637000 | 0.95581800  |
| H  | -4.31080600 | -2.57244400 | -0.76064000 |

2(TeMe)-conformer 3 (acetonitrile)

Imaginary frequency: 0

G = -672.083727 hartree

|    |             |             |             |
|----|-------------|-------------|-------------|
| C  | 2.49429700  | 2.38740800  | 0.18568000  |
| C  | 2.53244900  | 1.01168500  | 0.04287600  |
| C  | 1.35774200  | 0.27035000  | -0.10333900 |
| C  | 0.12323500  | 0.93218600  | -0.07750700 |
| C  | 0.09377700  | 2.31843500  | 0.07180900  |
| C  | 1.26986600  | 3.04481700  | 0.18991700  |
| H  | 3.41461200  | 2.94744800  | 0.28746200  |
| H  | 3.47677500  | 0.48318700  | 0.02438600  |
| H  | -0.85705000 | 2.83466800  | 0.10969500  |
| H  | 1.22754900  | 4.12098400  | 0.29766900  |
| C  | 1.45605700  | -1.18988800 | -0.31444500 |
| H  | 0.62319900  | -1.65552700 | -0.85530800 |
| Te | -1.74221600 | -0.07382800 | -0.22123300 |
| C  | -1.40032300 | -1.45663800 | 1.37646600  |
| H  | -0.99151400 | -0.91390000 | 2.22370700  |
| H  | -2.36972900 | -1.87419000 | 1.63779000  |
| H  | -0.72675500 | -2.24911800 | 1.06431700  |
| N  | 2.44474500  | -1.86701900 | 0.08250200  |
| C  | 2.44997700  | -3.28553300 | -0.21047900 |
| H  | 1.55489300  | -3.61729800 | -0.74730700 |
| H  | 3.33291000  | -3.52326000 | -0.80592000 |
| H  | 2.53469800  | -3.84176600 | 0.72423900  |

**5 (acetonitrile)**

Imaginary frequency: 0

G = -345.481128 hartree

|   |             |             |             |
|---|-------------|-------------|-------------|
| C | 0.52882200  | 0.20448400  | -0.00005500 |
| C | 0.03960800  | -1.10161300 | -0.00007100 |
| C | -1.32613300 | -1.32205000 | -0.00003700 |
| C | -2.20465800 | -0.24043300 | 0.00002900  |
| C | -1.72022500 | 1.06097600  | 0.00006400  |
| C | -0.35031100 | 1.28324500  | 0.00001400  |
| H | -1.71357000 | -2.33224600 | -0.00003500 |
| H | -3.27262500 | -0.41661900 | 0.00002900  |
| H | -2.40695300 | 1.89679100  | 0.00020200  |
| C | 1.98230900  | 0.46543000  | -0.00011000 |
| O | 2.83106200  | -0.39352400 | 0.00018700  |
| H | 2.26533300  | 1.53311400  | -0.00060100 |
| H | 0.74043600  | -1.92664100 | -0.00010300 |
| H | 0.04240700  | 2.29356400  | -0.00000200 |

**6 (acetonitrile)**

Imaginary frequency: 0

G = -364.861195 hartree

|   |             |             |             |
|---|-------------|-------------|-------------|
| C | 0.03684100  | 0.20378700  | 0.00003400  |
| C | 0.53592600  | -1.09969400 | 0.00000900  |
| C | 1.90239200  | -1.32135800 | -0.00002500 |
| C | 2.78642800  | -0.24508500 | -0.00004400 |
| C | 2.29711800  | 1.05351800  | 0.00000700  |
| C | 0.92599100  | 1.27557500  | -0.00001100 |
| H | 2.28492000  | -2.33389300 | -0.00003300 |
| H | 3.85421100  | -0.42202500 | -0.00007800 |
| H | 2.98076000  | 1.89238200  | 0.00000500  |
| C | -1.41267200 | 0.47719800  | 0.00003800  |
| H | -1.69239200 | 1.53879200  | -0.00003300 |
| H | -0.16112200 | -1.92730500 | -0.00001500 |
| N | -2.28690400 | -0.43350800 | 0.00020100  |
| C | -3.67868100 | -0.03421800 | -0.00009700 |
| H | -4.17102300 | -0.45534300 | -0.87812200 |
| H | -4.17199800 | -0.45706600 | 0.87652500  |
| H | -3.81445900 | 1.05247600  | 0.00083500  |
| H | 0.53937500  | 2.28820400  | 0.00003900  |

## 7. References

- S1. Frisch, M. J.; Trucks, G. W.; Schlegel, H. B.; Scuseria, G. E.; Robb, M. A.; Cheeseman, J. R.; Scalmani, G.; Barone, V.; Mennucci, B.; Petersson, G. A.; Nakatsuji, H.; Caricato, M.; Li, X.; Hratchian, H. P.; Izmaylov, A. F.; Bloino, J.; Zheng, G.; Sonnenberg, J. L.; Hada, M.; Ehara, M.; Toyota, K.; Fukuda, R.; Hasegawa, J.; Ishida, M.; Nakajima, T.; Honda, Y.; Kitao, O.; Nakai, H.; Vreven, T.; Montgomery, J. A., Jr.; Peralta, J. E.; Ogliaro, F.; Bearpark, M.; Heyd, J. J.; Brothers, E.; Kudin, K. N.; Staroverov, V. N.; Kobayashi, R.; Normand, J.; Raghavachari, K.; Rendell, A.; Burant, J. C.; Iyengar, S. S.; Tomasi, J.; Cossi, M.; Rega, N.; Millam, J. M.; Klene, M.; Knox, J. E.; Cross, J. B.; Bakken, V.; Adamo, C.; Jaramillo, J.; Gomperts, R.; Stratmann, R. E.; Yazyev, O.; Austin, A. J.; Cammi, R.; Pomelli, C.; Ochterski, J. W.; Martin, R. L.; Morokuma, K.; Zakrzewski, V. G.; Voth, G. A.; Salvador, P.; Dannenberg, J. J.; Dapprich, S.; Daniels, A. D.; Farkas, Ö .; Foresman, J. B.; Ortiz, J. V.; Cioslowski, J.; Fox, D. J. *Gaussian 09*, revision D.01; Gaussian, Inc.: Wallingford, CT, **2010**.
- S2. Tang, Z.; Song, Y.; Zhang, S.; Wang, W.; Xu, Y.; Wu, D.; Su, P. *J. Comput. Chem.* **2021**, *42*, 2341-2351.
- S3. Glendening, E. D.; Landis, C. R.; Weinhold, F. Natural bond orbital methods. *Wiley Interdiscip. Rev.: Comput. Mol. Sci.* **2012**, *2*, 1-42.
- S4. Johnson, E. R.; Keinan, S.; Mori-Sánchez, P.; Contreras-García, J. A.; Cohen, J.; Yang, W. *J. Am. Chem. Soc.* **2010**, *132*, 6498-6506.
- S5. Lu, T.; Chen, F. *J. Comput. Chem.* **2012**, *33*, 580-592.
- S6. Humphrey, W.; Dalke, A.; Schulten, K. *J. Mol. Graphics* **1996**, *14*, 33-38.
- S7. Prajapati, A.; Kumar, M.; Thakuria, R.; Basak, A. K. *Tetrahedron Lett.* **2019**, *60*, 150955
- S8. Liu, S.R.; Wu, S.P. *Org. Lett.* **2013**, *15*, 878-881.
- S9. Yu, F.; Li, P.; Wang, B.; Han, K. *J. Am. Chem. Soc.* **2013**, *135*, 7674-7680.
- S10. Cloonan, S. M.; Keating, J. J.; Butler, S. G.; Knox, A. J.; Jorgensen, A. M.; Peters, G. H.; Rai, D.; Corrigan, D.; Lloyd, D. G.; Williams, D. C.; Meegan, M. J. *Eur. J. Med. Chem.* **2009**, *44*, 4862-4888.
- S11. Yu, F.; Li, P.; Li, G.; Zhao, G.; Chu, T.; Han, K. *J. Am. Chem. Soc.* **2011**, *133*, 11030-11033.
- S12. Bieszczad, B.; Barbasiwicz, M. *Chem. Eur. J.* **2015**, *21*, 10322-10325.
